# Supplementary material for: Synthesis, unambiguous chemical characterization, and reactivity of 2,3,4,5-tetrahydro-1,5-benzoxazepines-3-ol
Source: Royal Society of Chemistry journal article supplement (doi:10.1039/c2ra21706f), 2012-01-01

**RSC.Advances: Supplementary information**

**Synthesis, unambiguous chemical characterization, and reactivity of 2,3,4,5-tetrahydro-1,5-benzoxazepines-3-ol**

M. Eugenia García-Rubiño, María C. Núñez, Miguel A. Gallo, Joaquín M. Campos\*

Departamento de Química Farmacéutica y Orgánica, Facultad de Farmacia, c/ Campus de Cartuja s/n 18071 Granada, Spain. Fax: +34 958

243845; Tel: +34-958-243850; E-mail: [jmcampos@ugr.es](mailto:jmcampos@ugr.es)

**Table of Contents**

|                                                 |     |
|-------------------------------------------------|-----|
| <sup>1</sup> H NMR spectrum of <b>4a</b> .....  | S2  |
| <sup>13</sup> C NMR spectrum of <b>4a</b> ..... | S3  |
| DEPT spectrum of <b>4a</b> .....                | S4  |
| HSQC spectrum of <b>4a</b> .....                | S5  |
| HMBC spectrum of <b>4a</b> .....                | S6  |
| <sup>1</sup> H NMR spectrum of <b>4d</b> .....  | S7  |
| <sup>13</sup> C NMR spectrum of <b>4d</b> ..... | S8  |
| DEPT spectrum of <b>4d</b> .....                | S9  |
| HSQC spectrum of <b>4d</b> .....                | S10 |
| HMBC spectrum of <b>4d</b> .....                | S11 |
| <sup>1</sup> H NMR spectrum of <b>4e</b> .....  | S12 |
| <sup>13</sup> C NMR spectrum of <b>4e</b> ..... | S13 |
| DEPT spectrum of <b>4e</b> .....                | S14 |
| HSQC spectrum of <b>4e</b> .....                | S15 |
| HMBC spectrum of <b>4e</b> .....                | S16 |
| <sup>1</sup> H NMR spectrum of <b>4f</b> .....  | S17 |
| <sup>13</sup> C NMR spectrum of <b>4f</b> ..... | S18 |
| DEPT spectrum of <b>4f</b> .....                | S19 |
| HSQC spectrum of <b>4f</b> .....                | S20 |
| HMBC spectrum of <b>4f</b> .....                | S21 |
| <sup>1</sup> H NMR spectrum of <b>5a</b> .....  | S22 |
| <sup>13</sup> C NMR spectrum of <b>5a</b> ..... | S23 |
| DEPT spectrum of <b>5a</b> .....                | S24 |
| HSQC spectrum of <b>5a</b> .....                | S25 |
| HMBC spectrum of <b>5a</b> .....                | S26 |
| <sup>1</sup> H NMR spectrum of <b>6</b> .....   | S27 |
| <sup>13</sup> C NMR spectrum of <b>6</b> .....  | S28 |
| DEPT spectrum of <b>6</b> .....                 | S29 |
| <sup>1</sup> H NMR spectrum of <b>7</b> .....   | S30 |
| <sup>13</sup> C NMR spectrum of <b>7</b> .....  | S31 |
| DEPT spectrum of <b>7</b> .....                 | S32 |
| <sup>1</sup> H NMR spectrum of <b>8</b> .....   | S33 |
| <sup>13</sup> C NMR spectrum of <b>8</b> .....  | S34 |
| DEPT spectrum of <b>8</b> .....                 | S35 |

S2

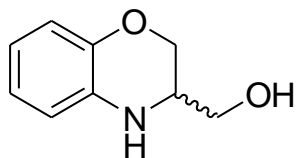

4a

500 MHz, CDCl<sub>3</sub>

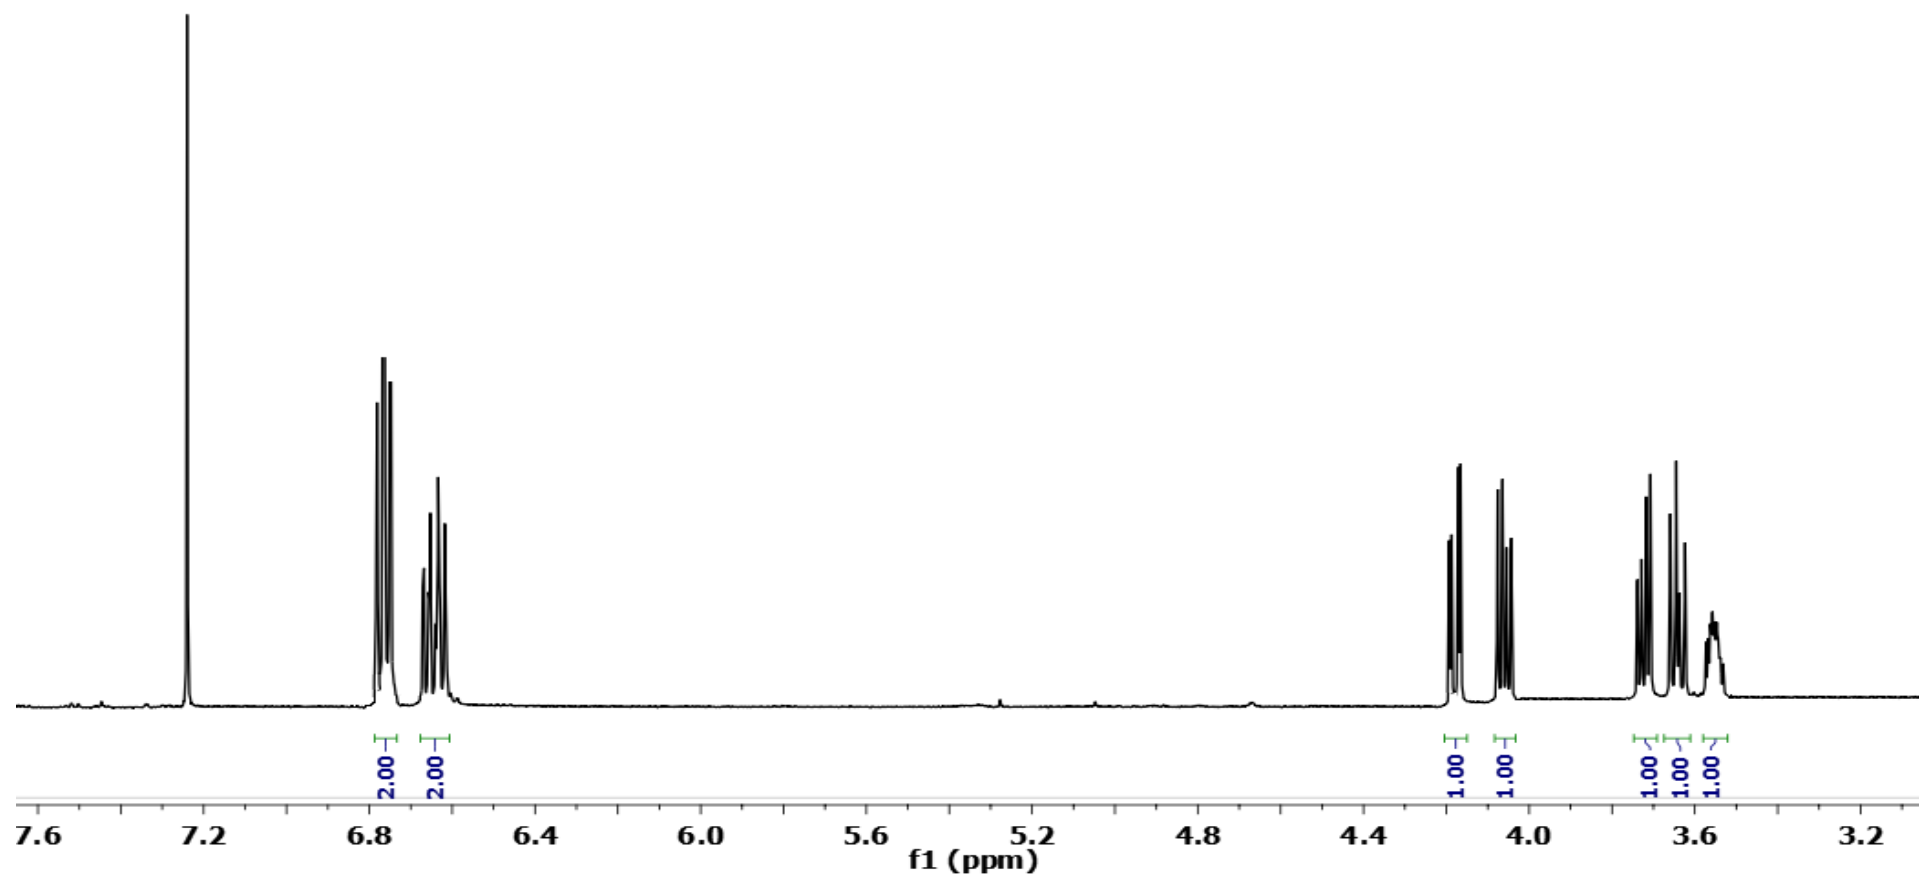

S 3

500 MHz, CDCl<sub>3</sub>

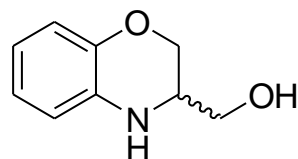

4a

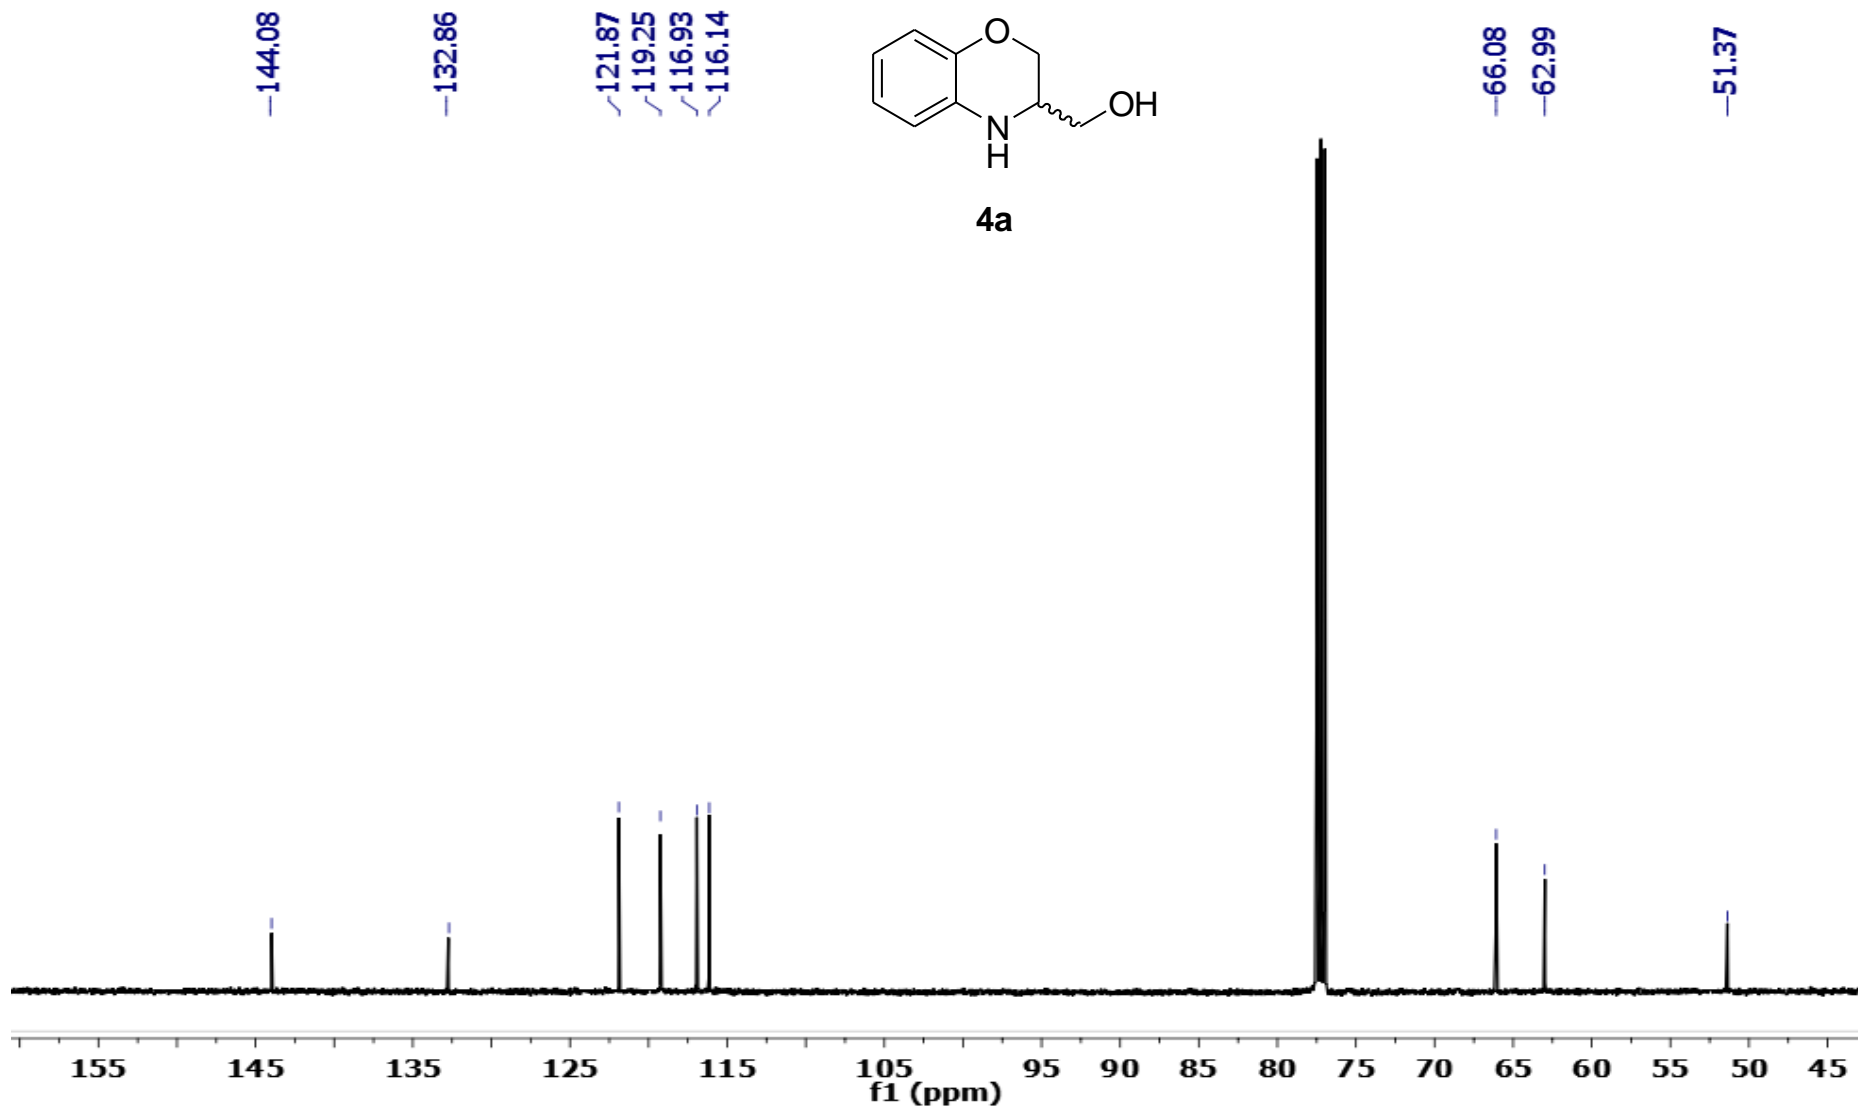

S 4

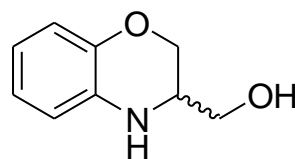

4a

500 MHz, CDCl<sub>3</sub>

121.87  
119.25  
116.93  
116.14

66.08  
62.99

51.37

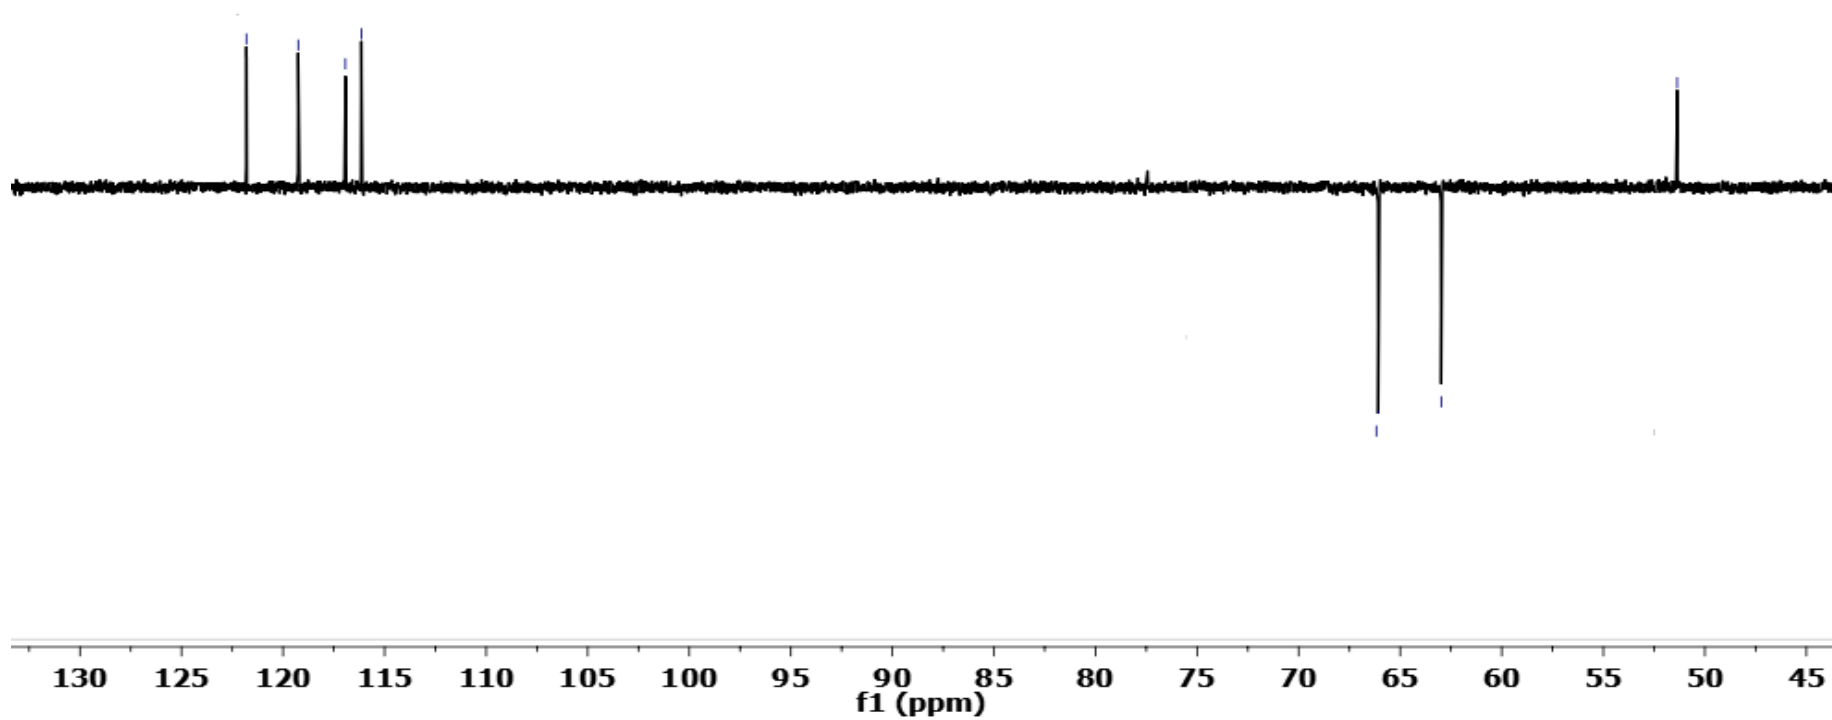

500 MHz, CDCl<sub>3</sub>

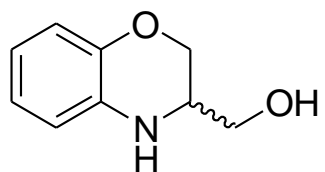

4a

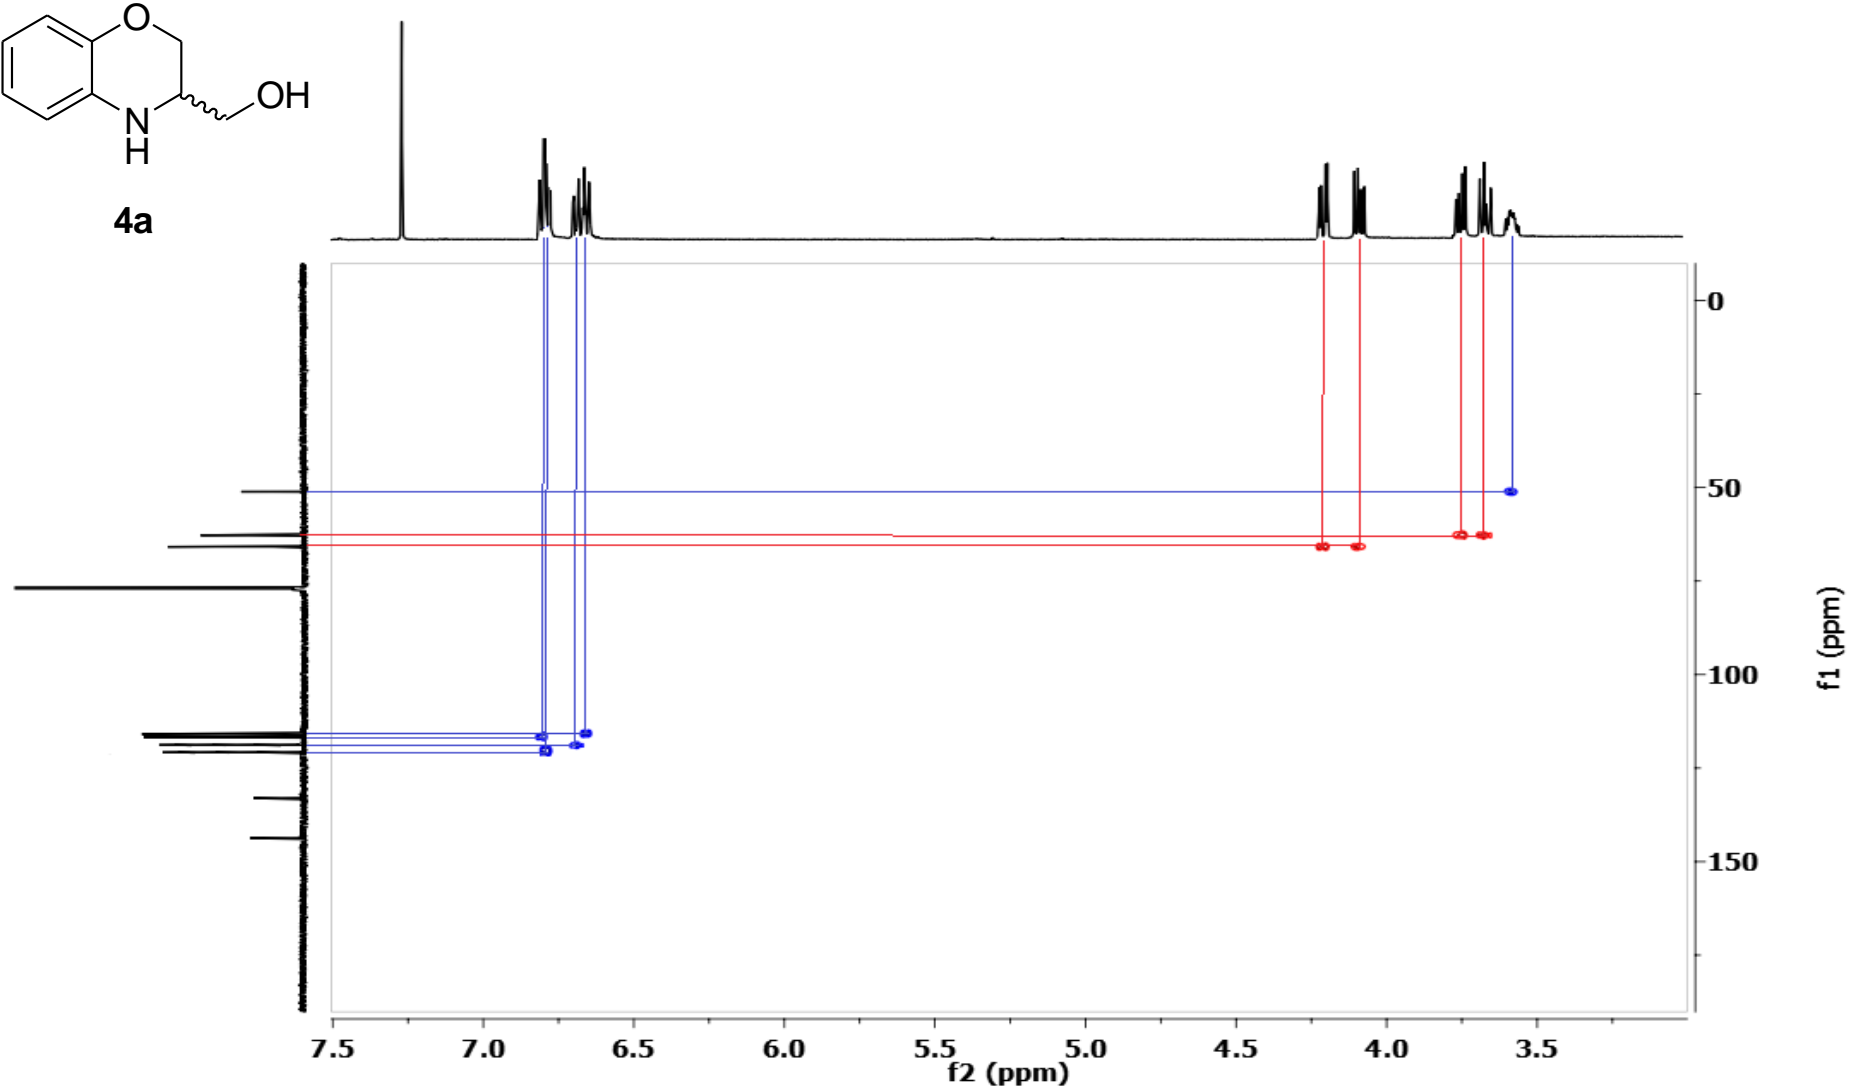

500 MHz, CDCl<sub>3</sub>

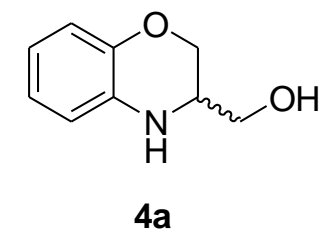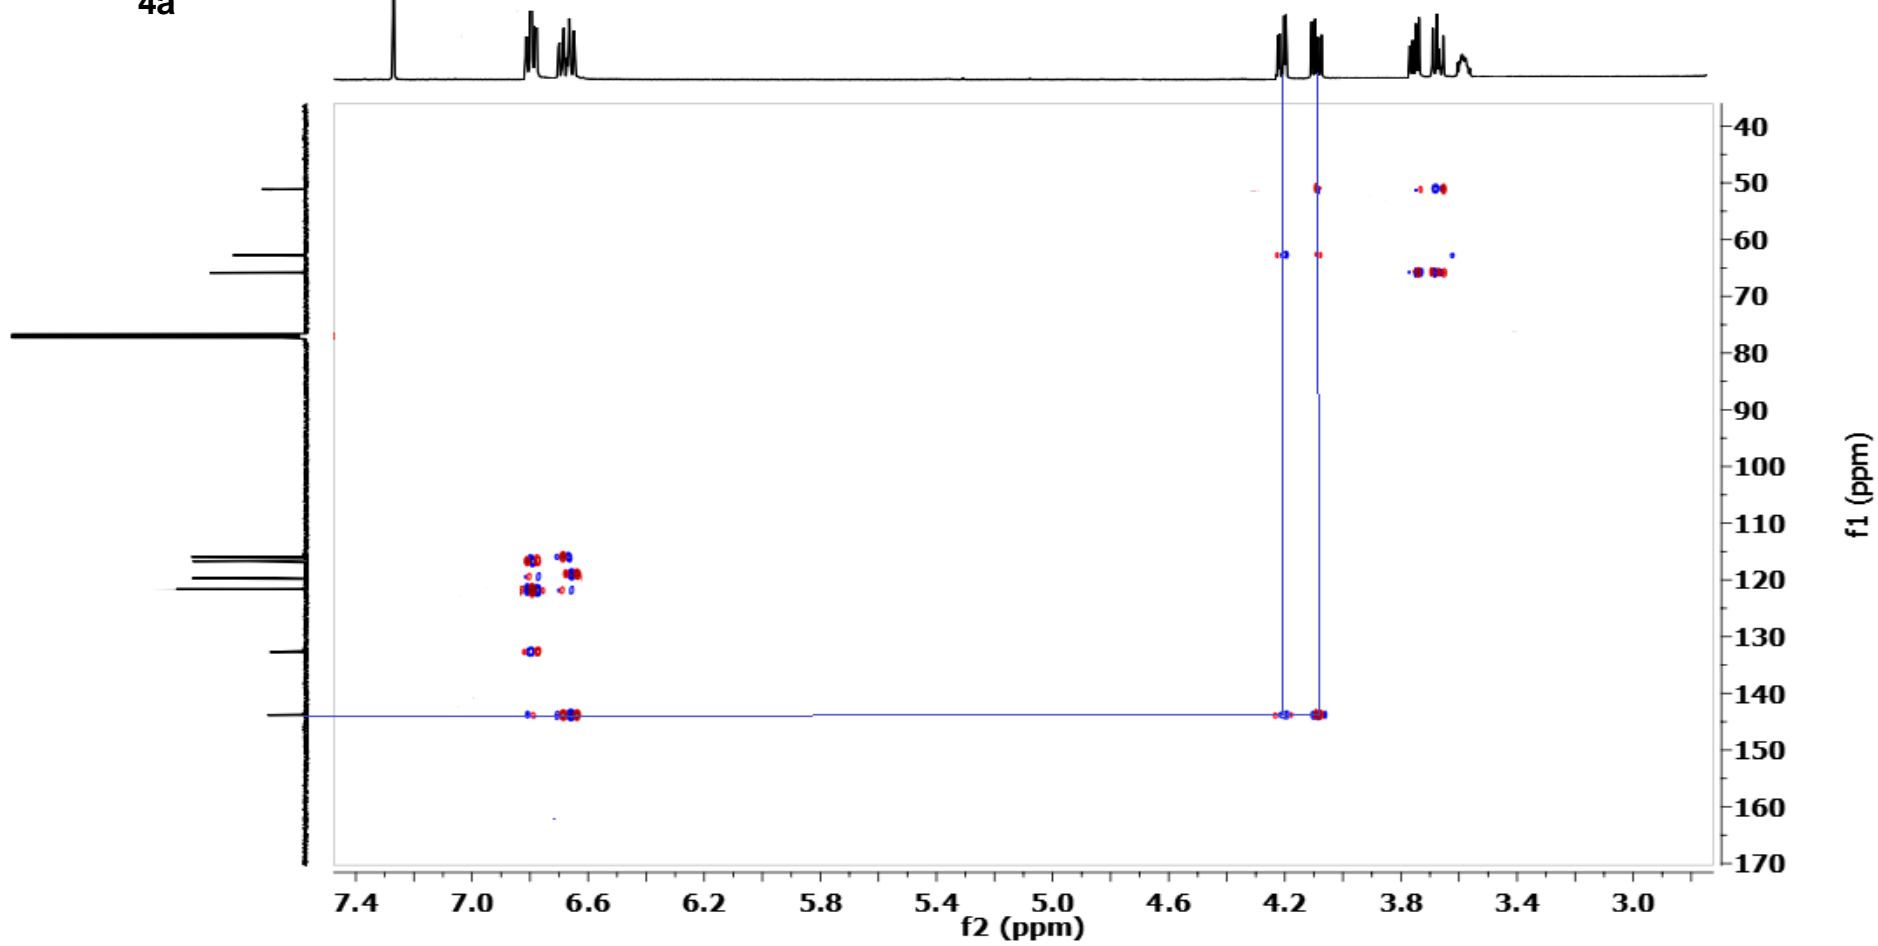

S 7

500 MHz, CDCl<sub>3</sub>

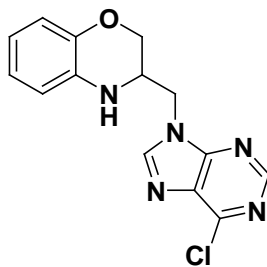

4 d

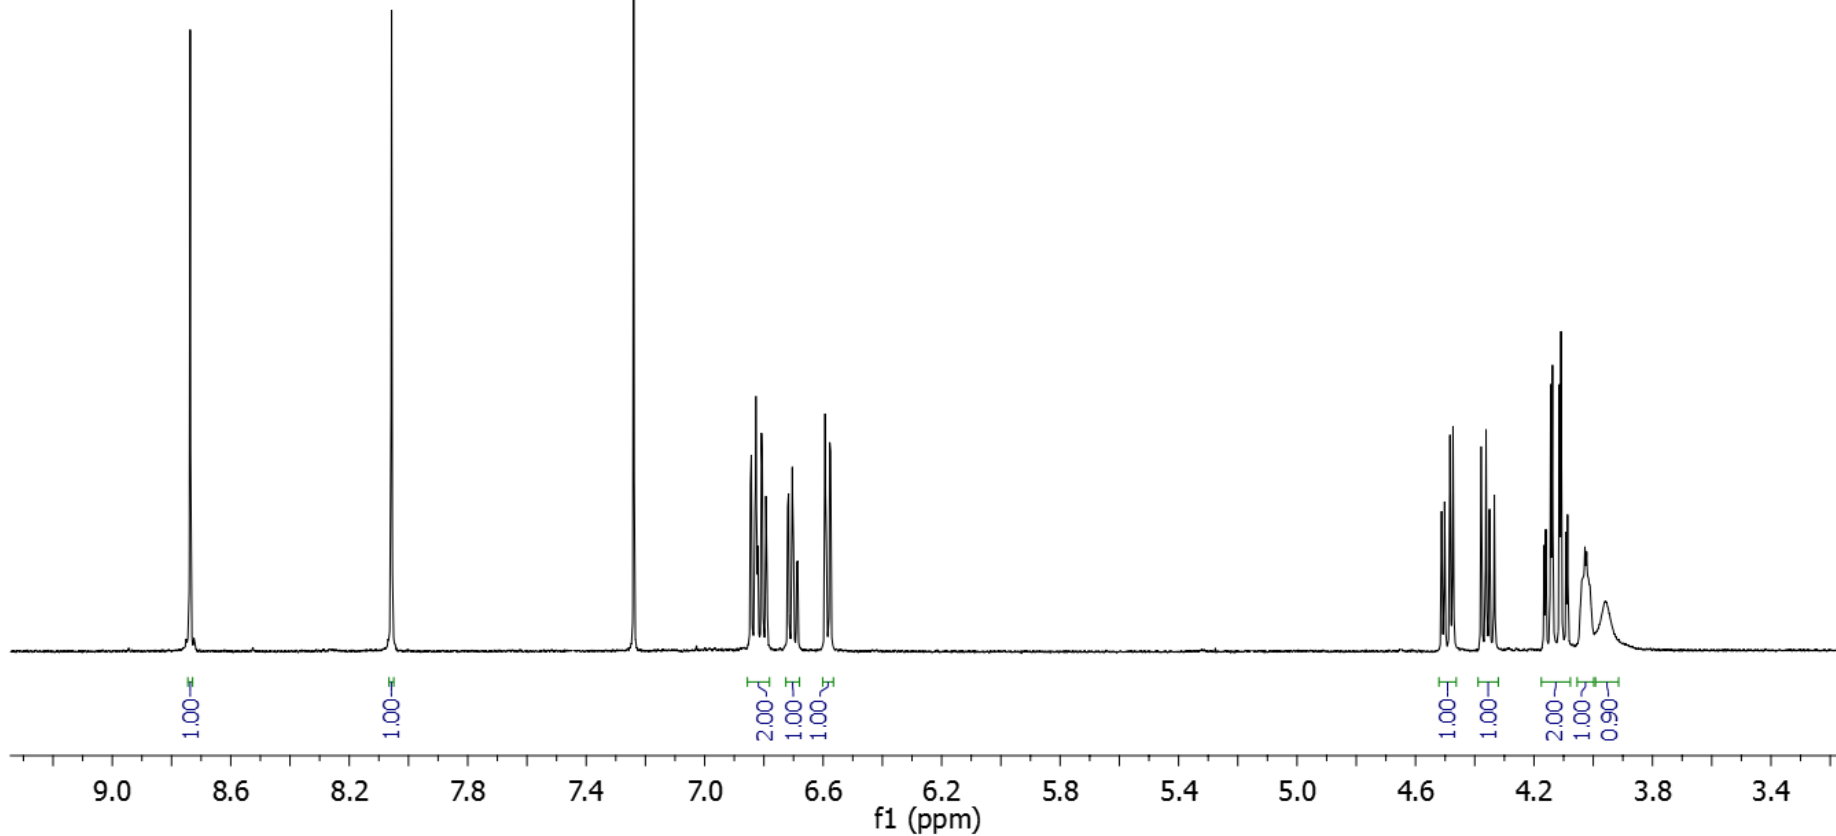

S 8

500 MHz, CDCl<sub>3</sub>

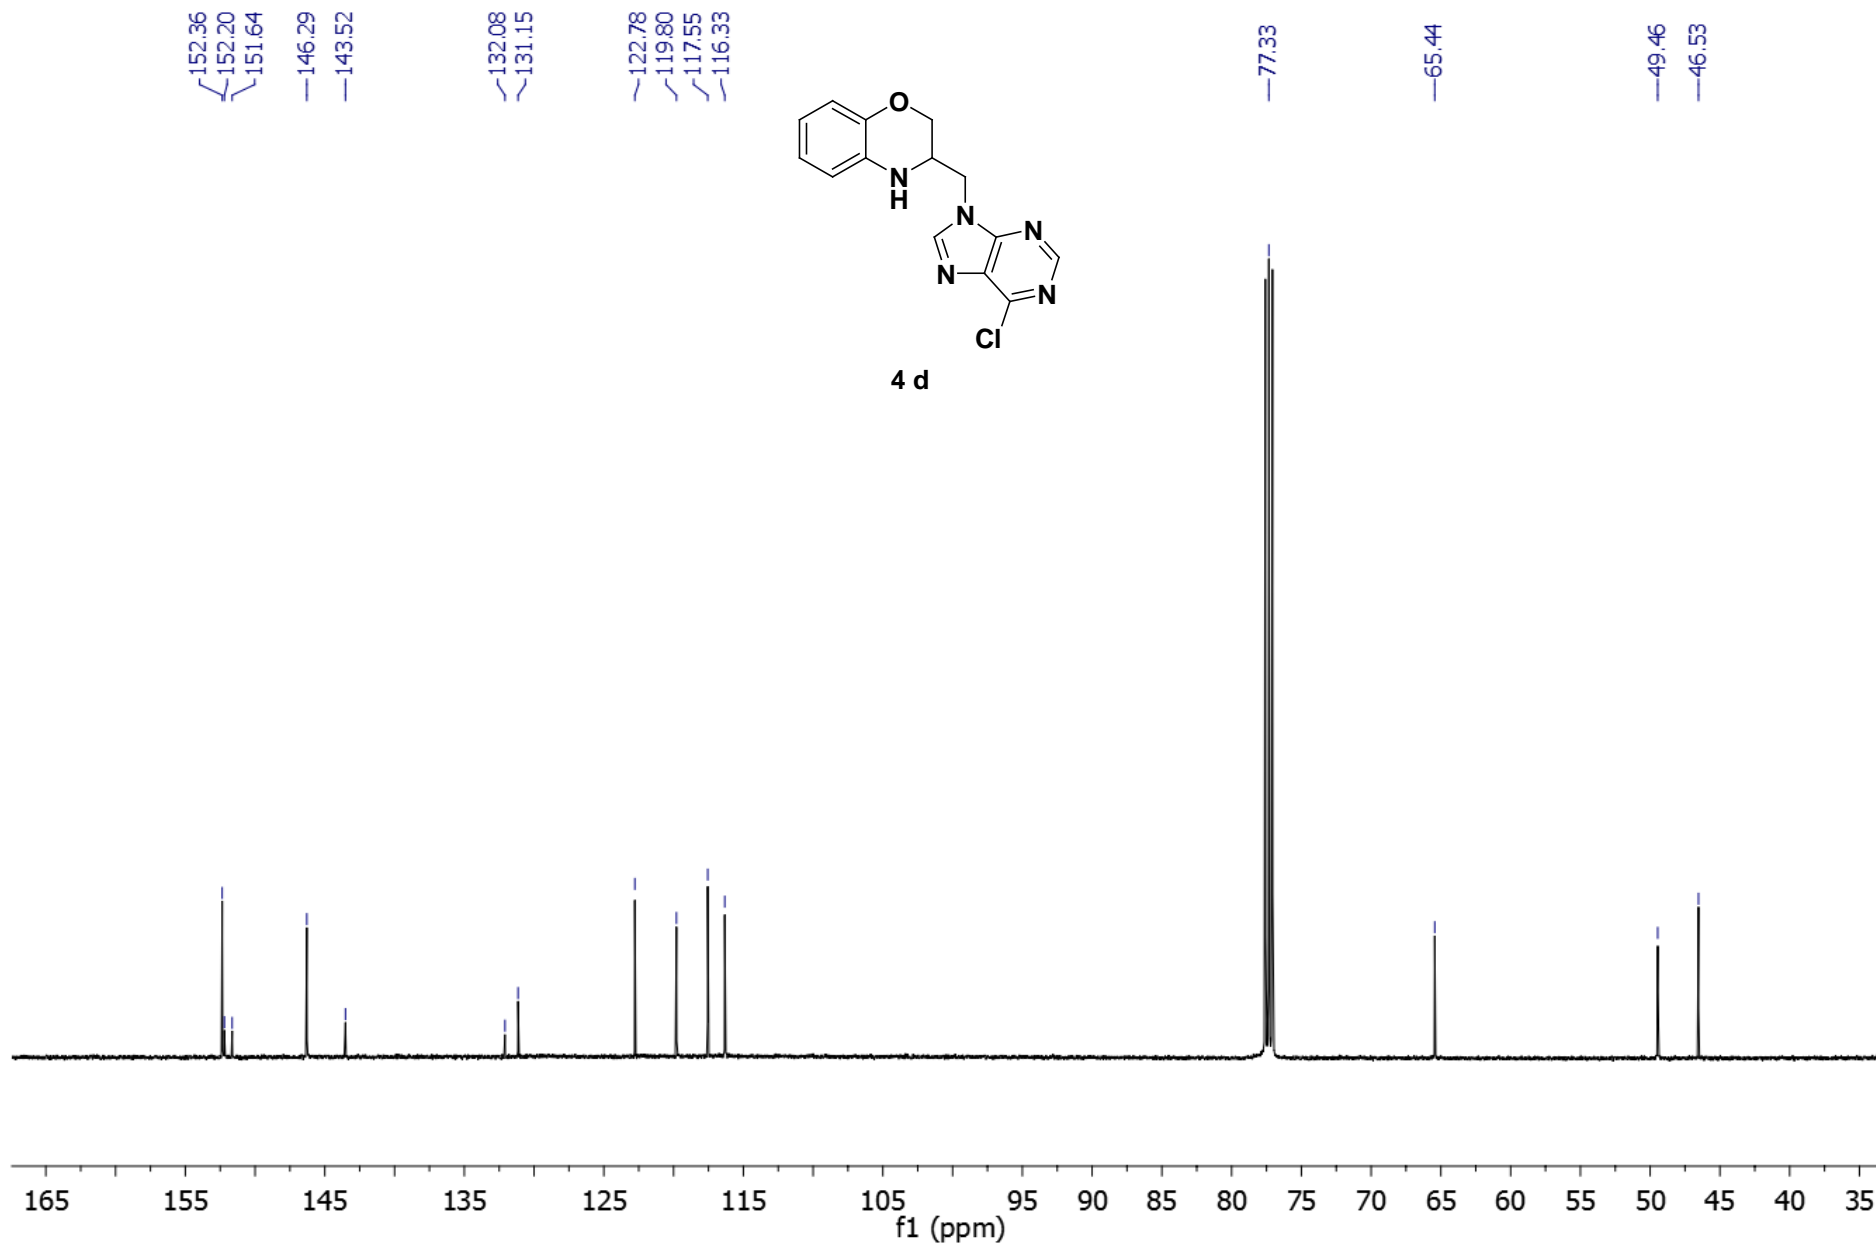



S 9

500 MHz, CDCl<sub>3</sub>

—152.36

—146.29

—122.78

—119.80

—117.55

—116.33

—65.44

—49.46

—46.53

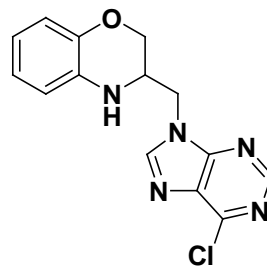

4 d

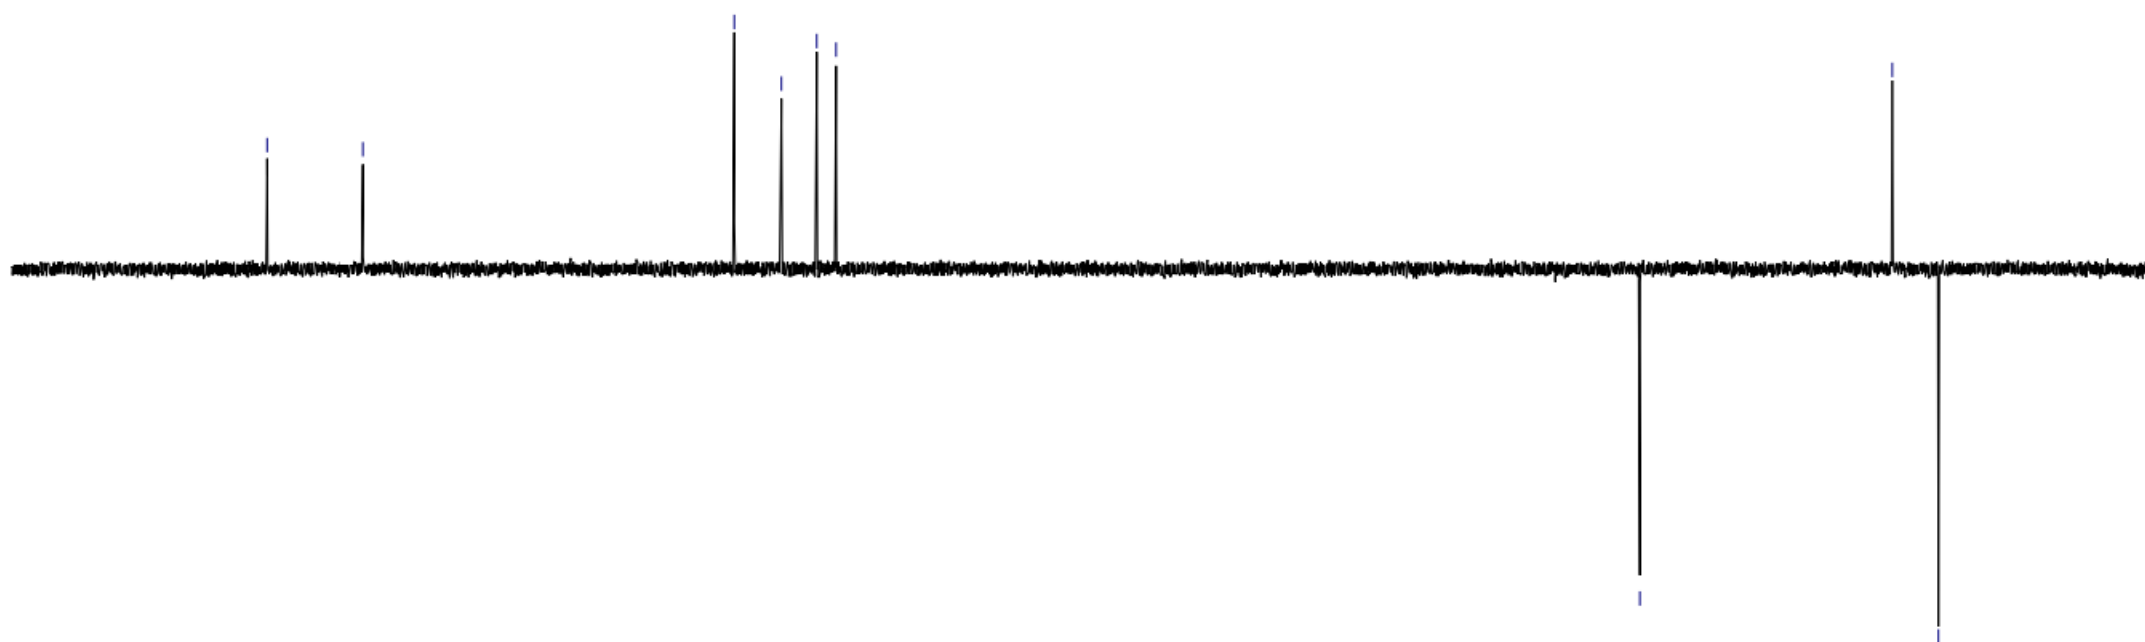

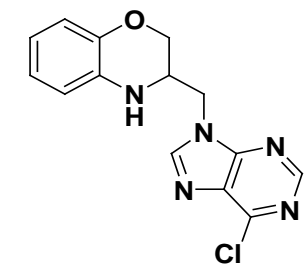

4 d

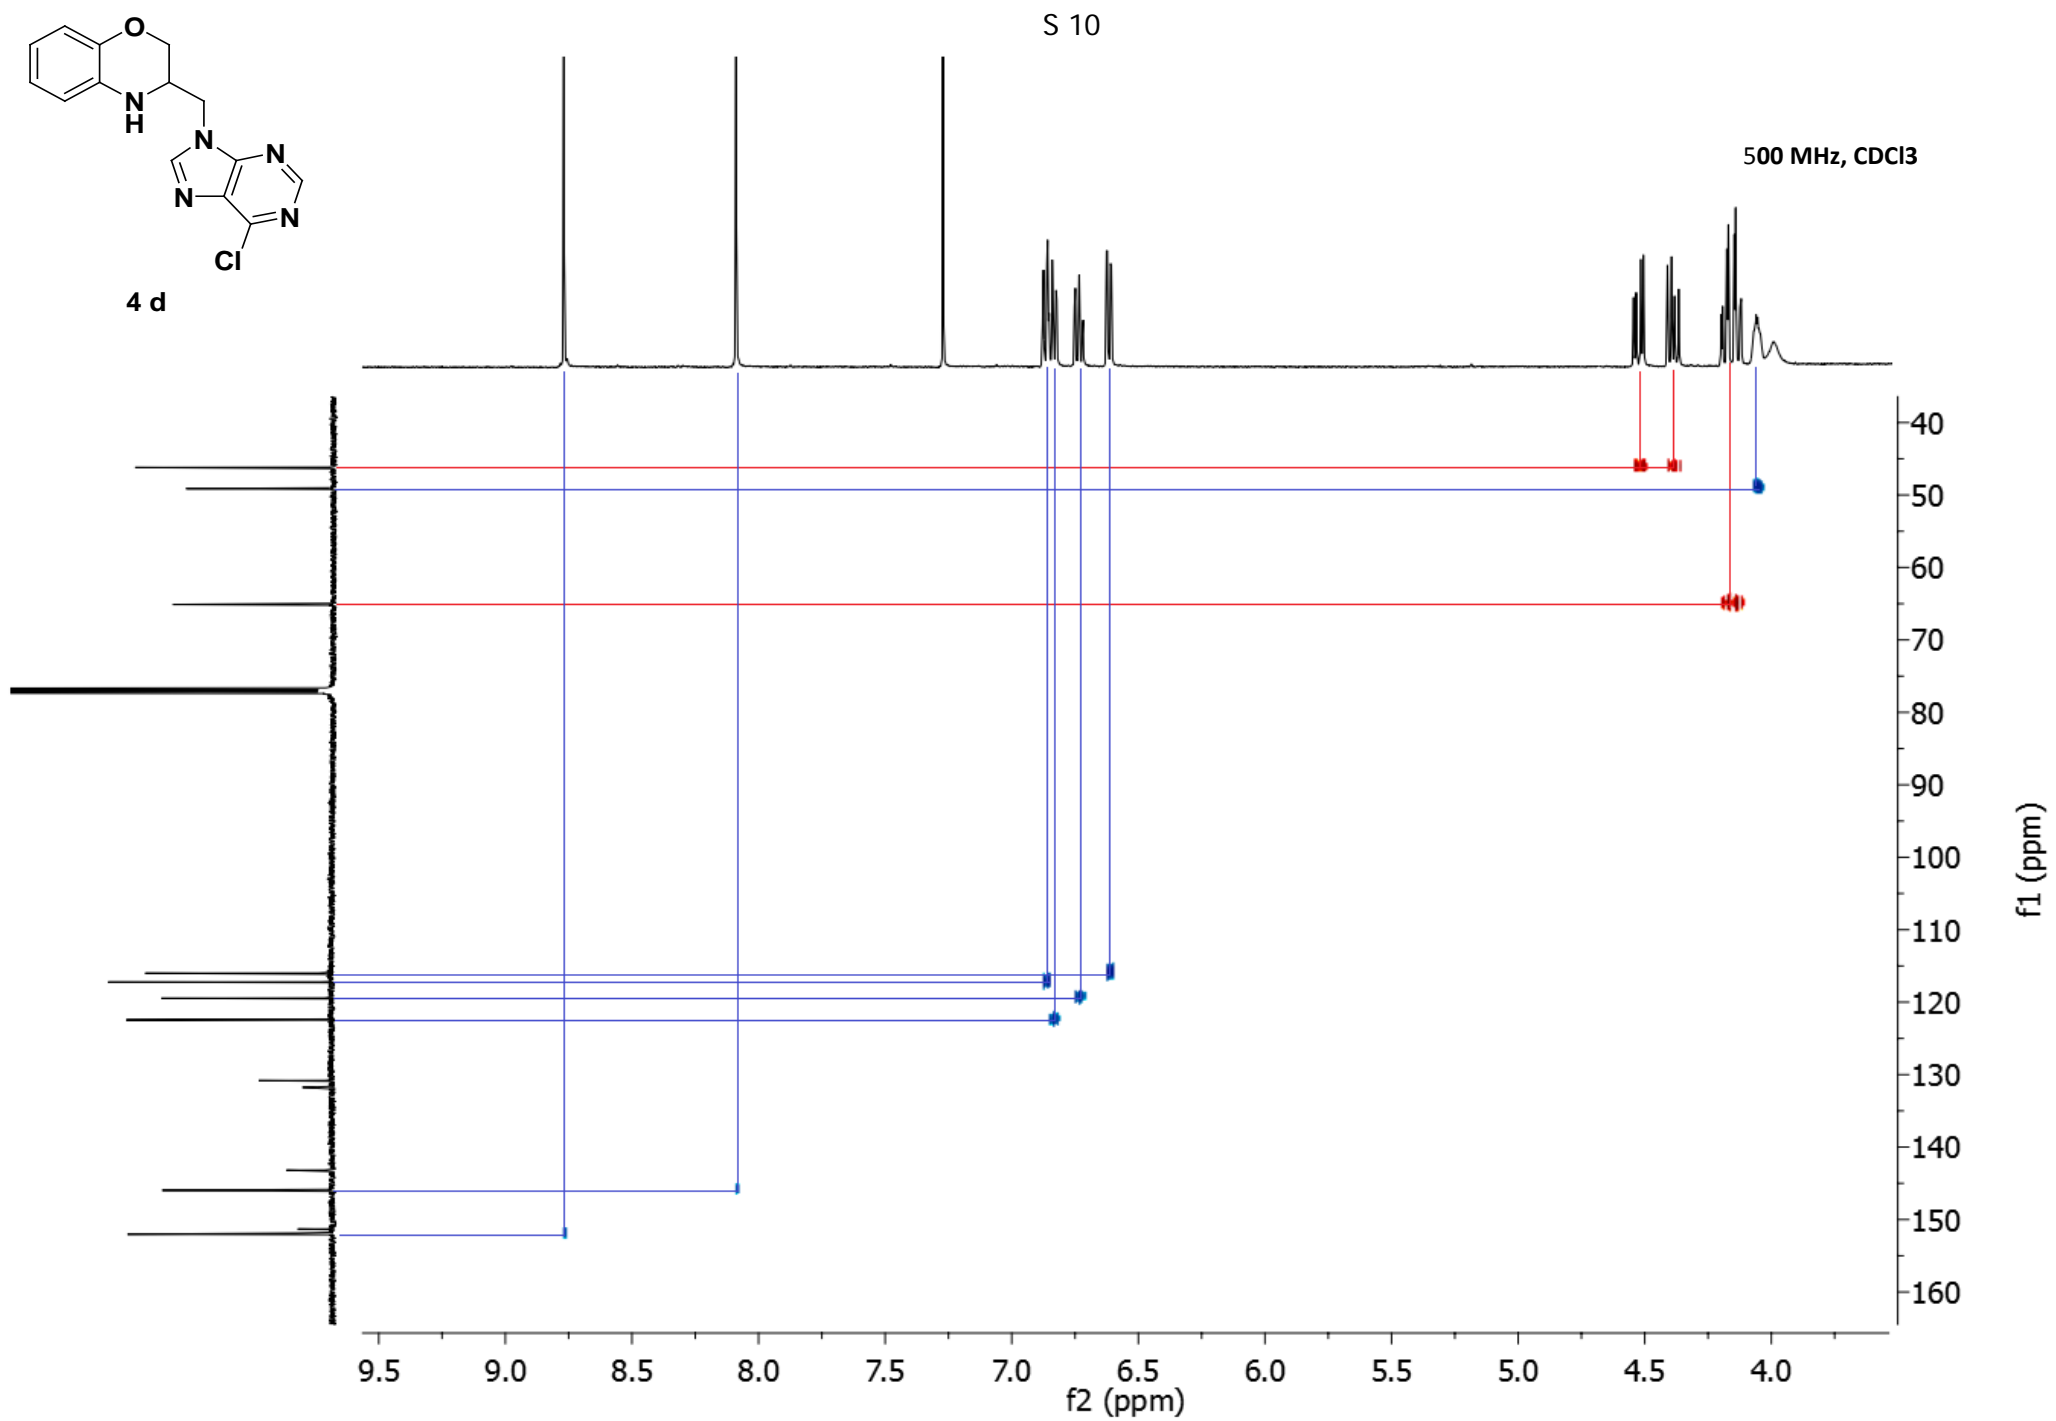

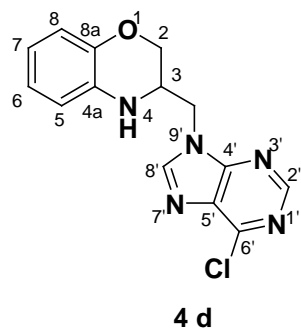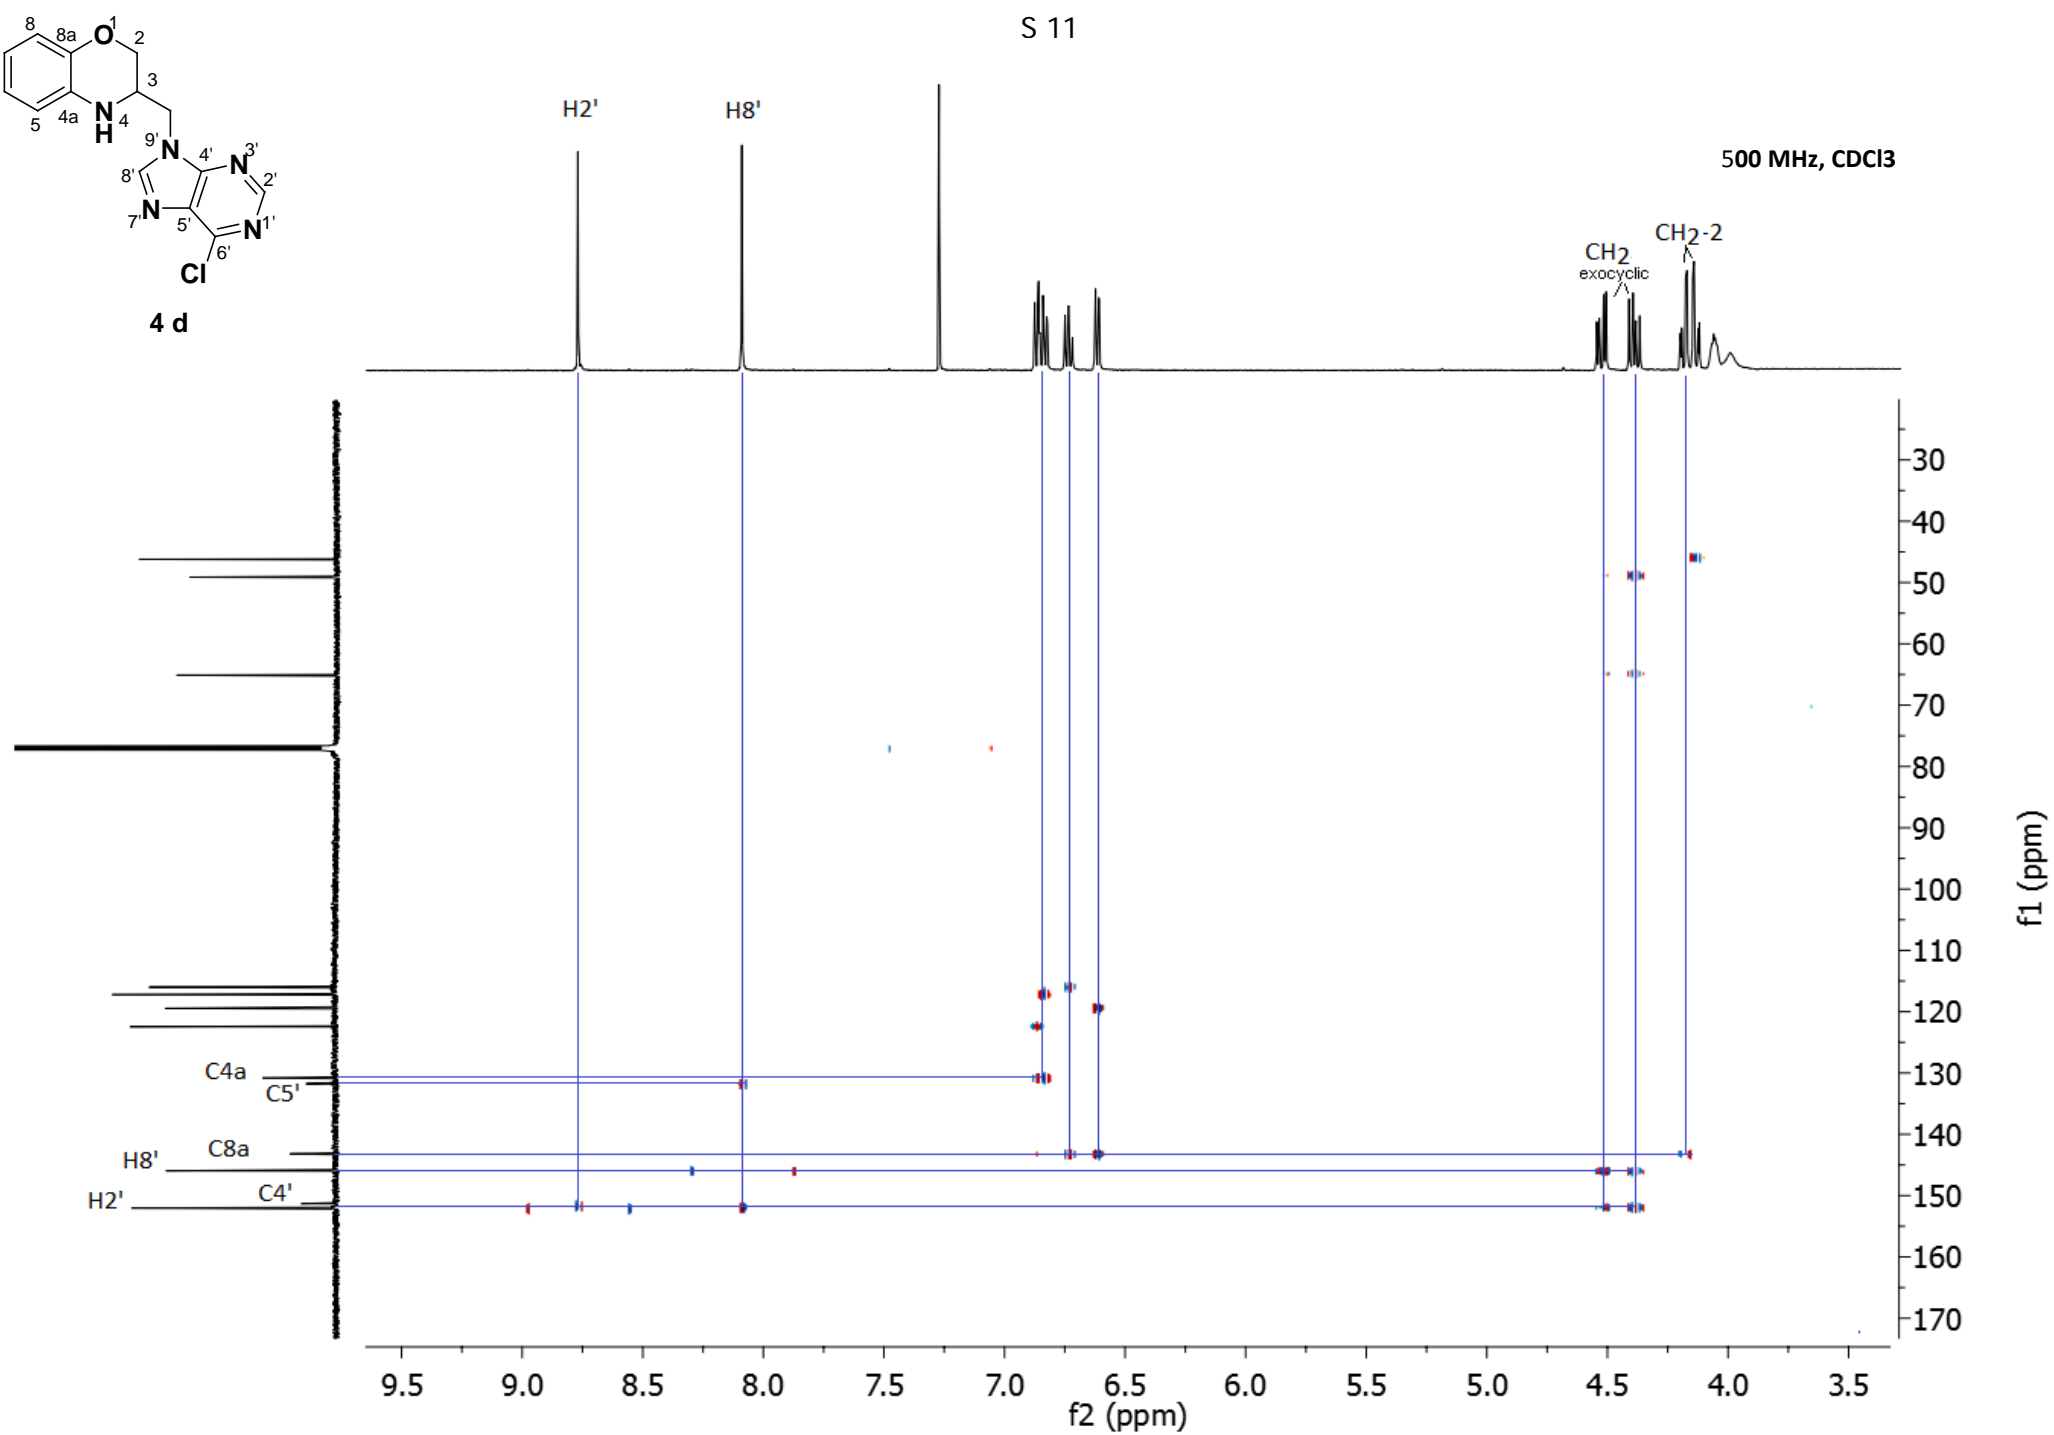

S 12

500 MHz, CDCl<sub>3</sub>

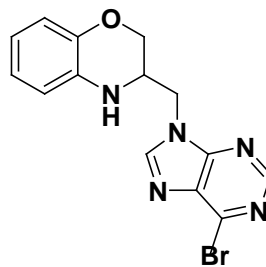

4 e

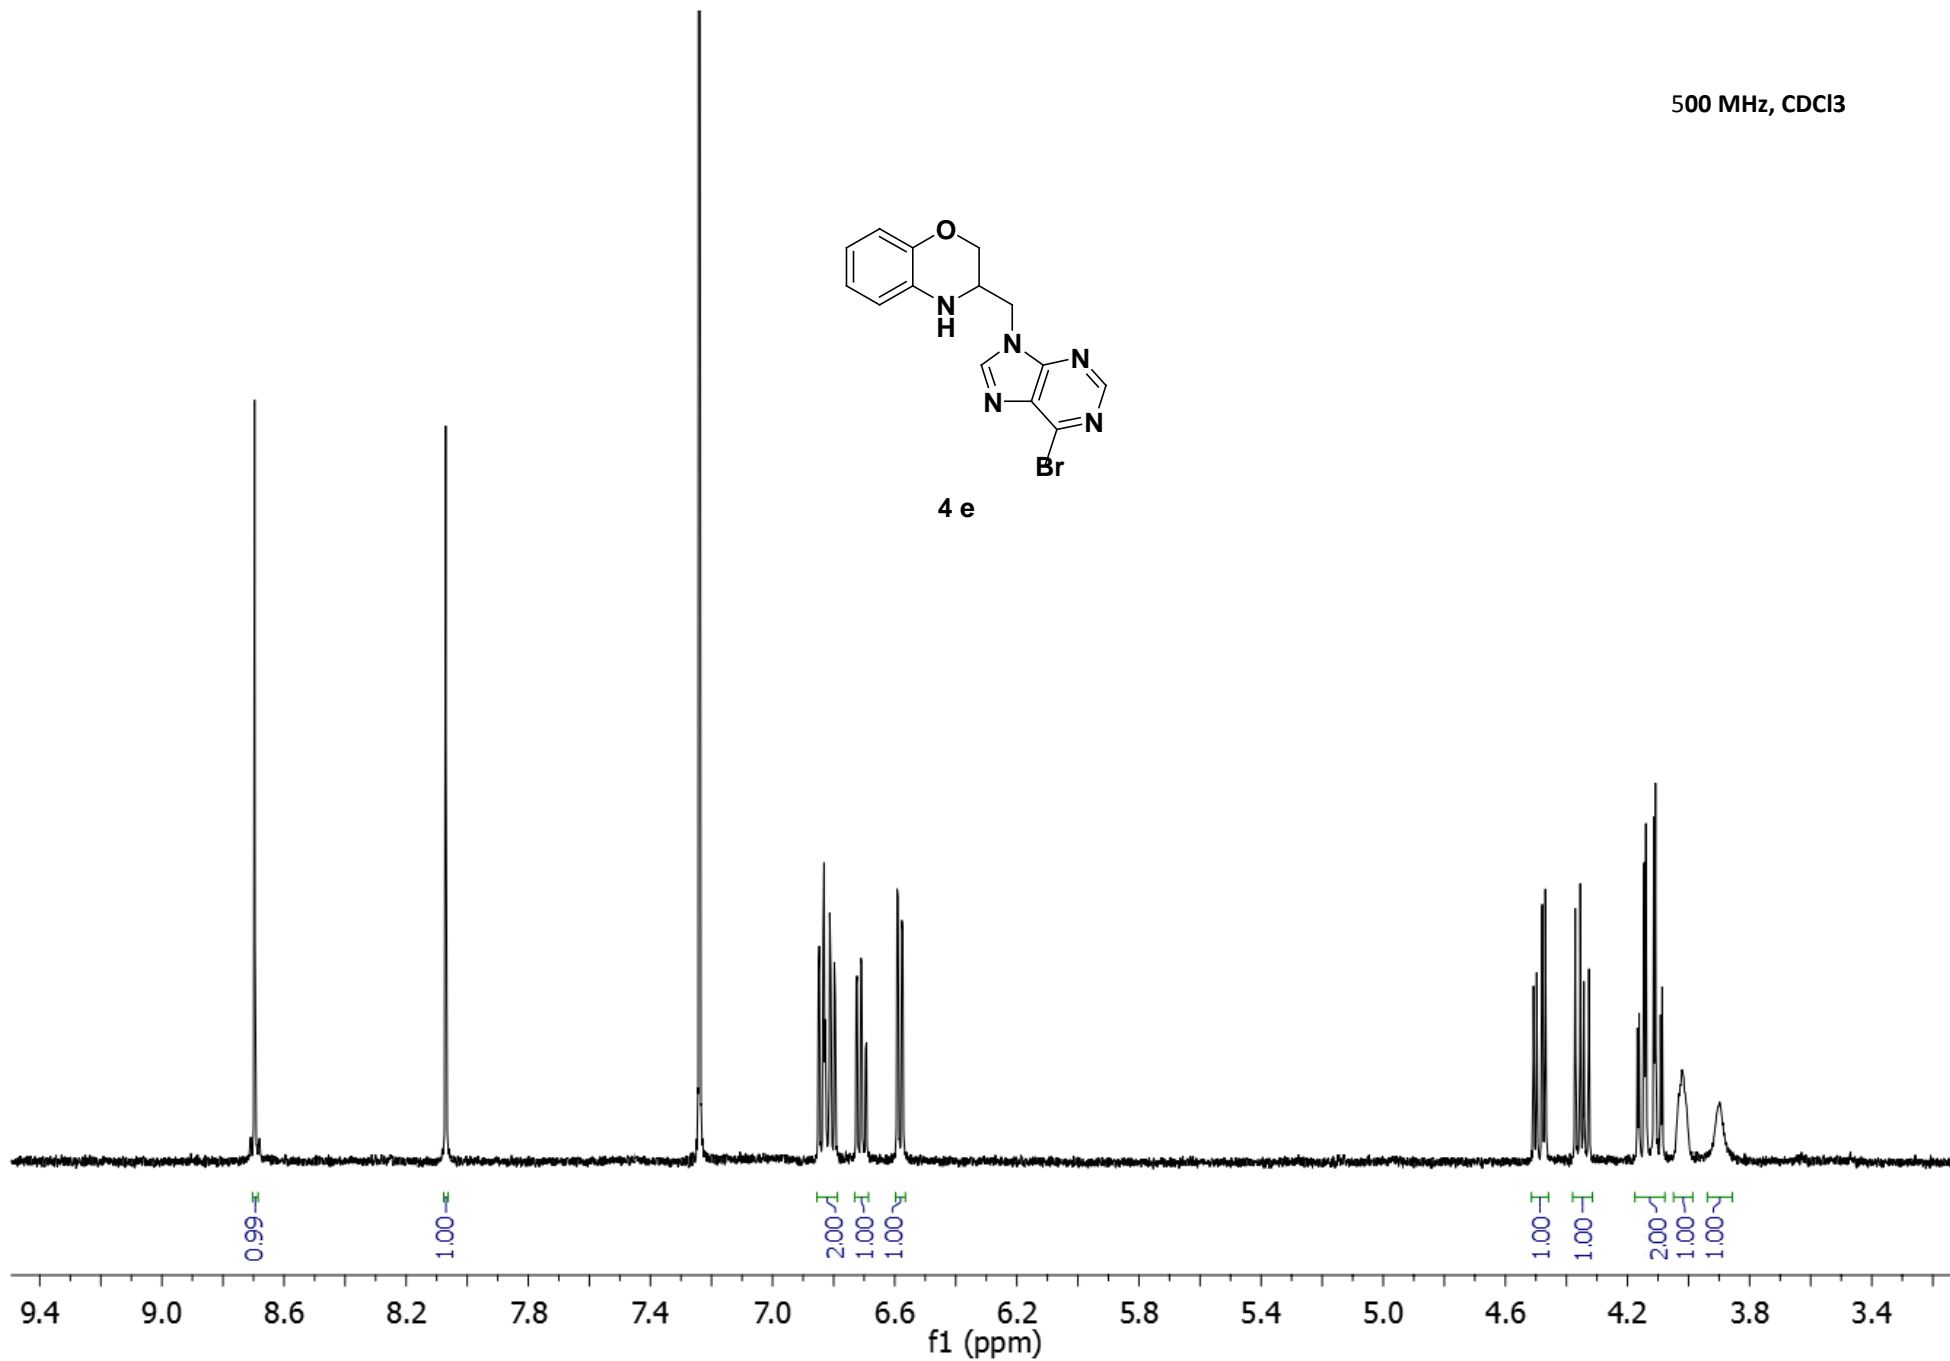

S 13

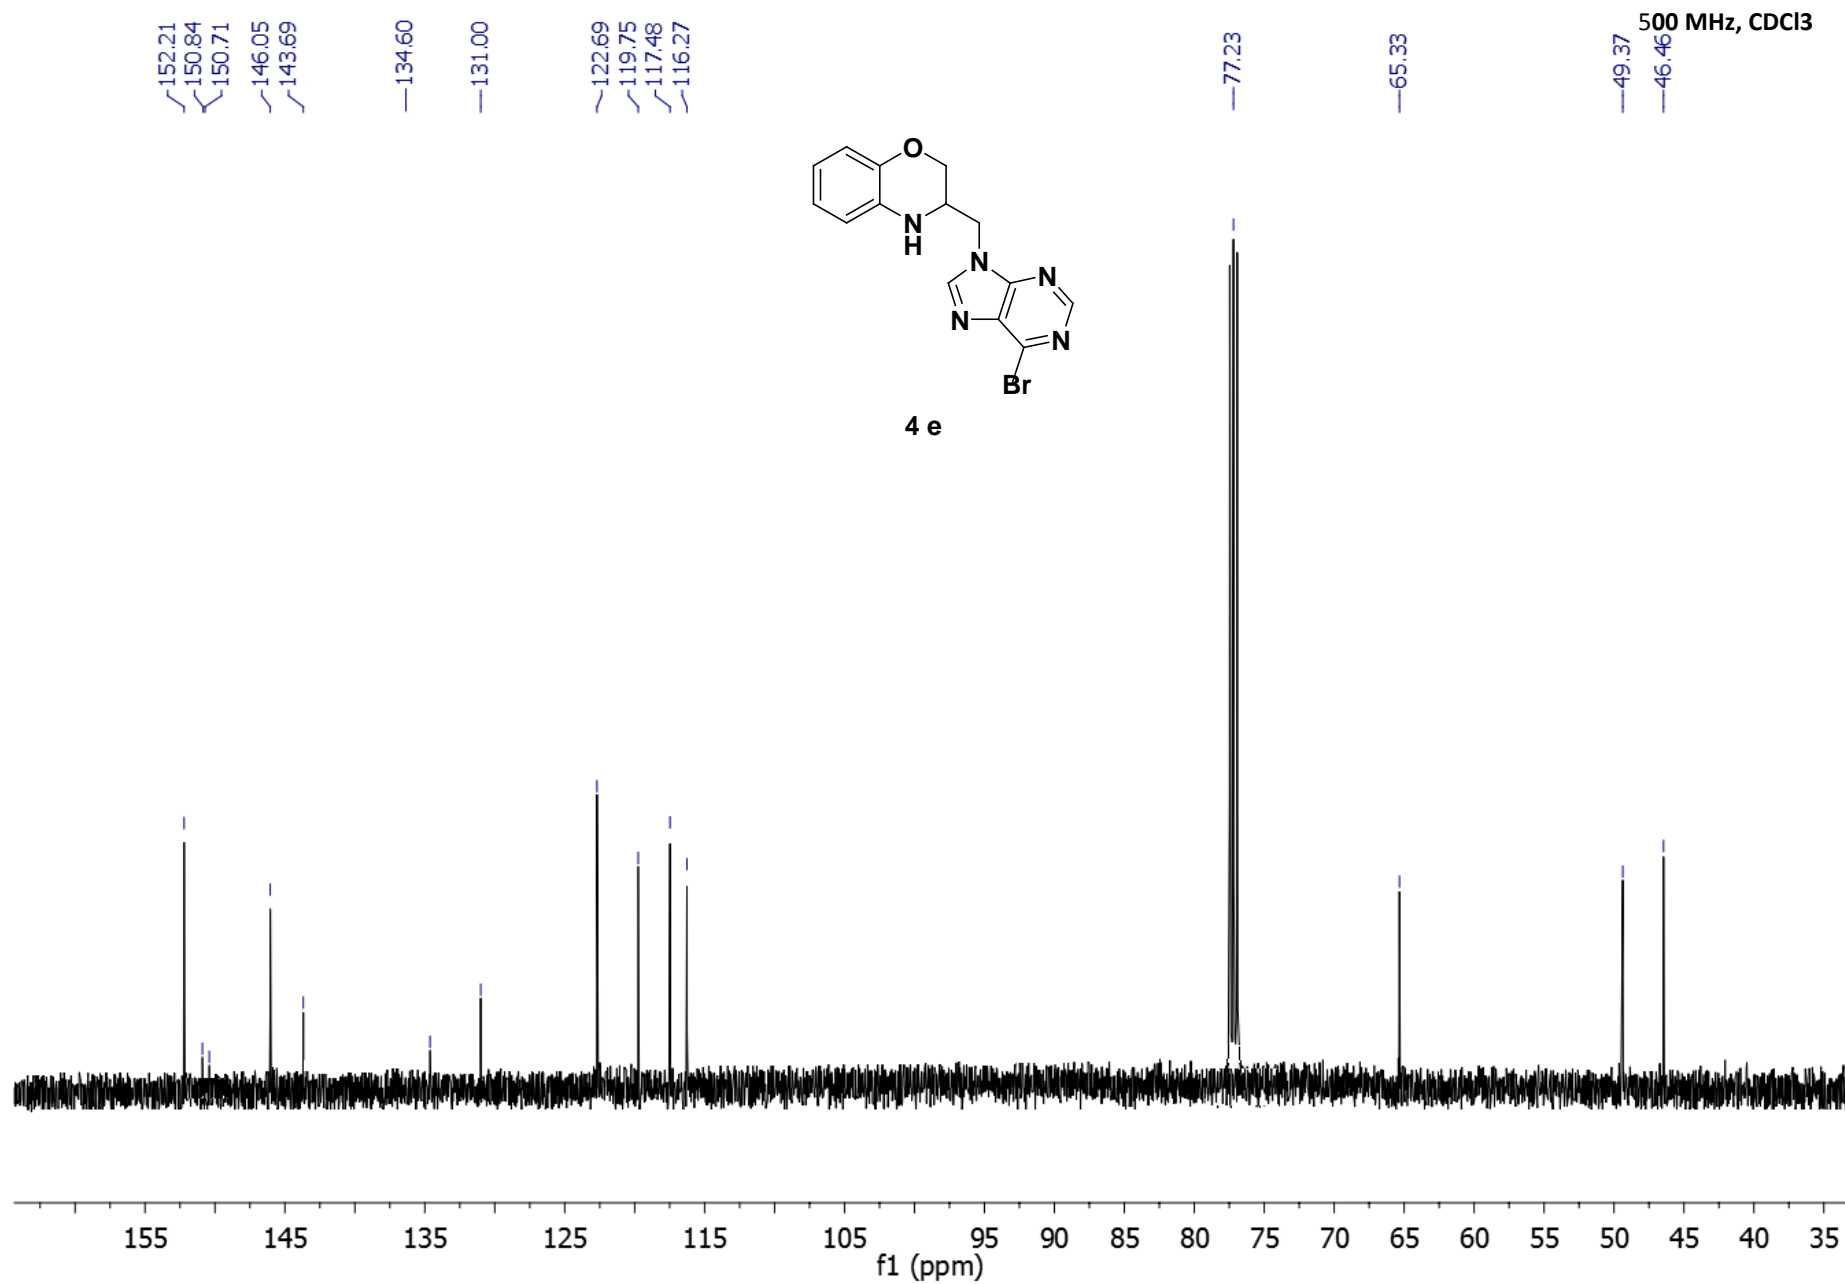

S 14

500 MHz, CDCl<sub>3</sub>

—152.21

—146.05

—122.69

—119.75

—117.48

—116.27

—65.33

—49.37

—46.46

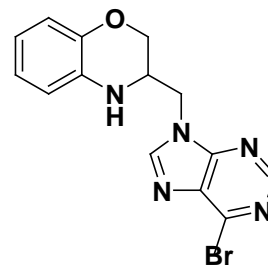

4 e

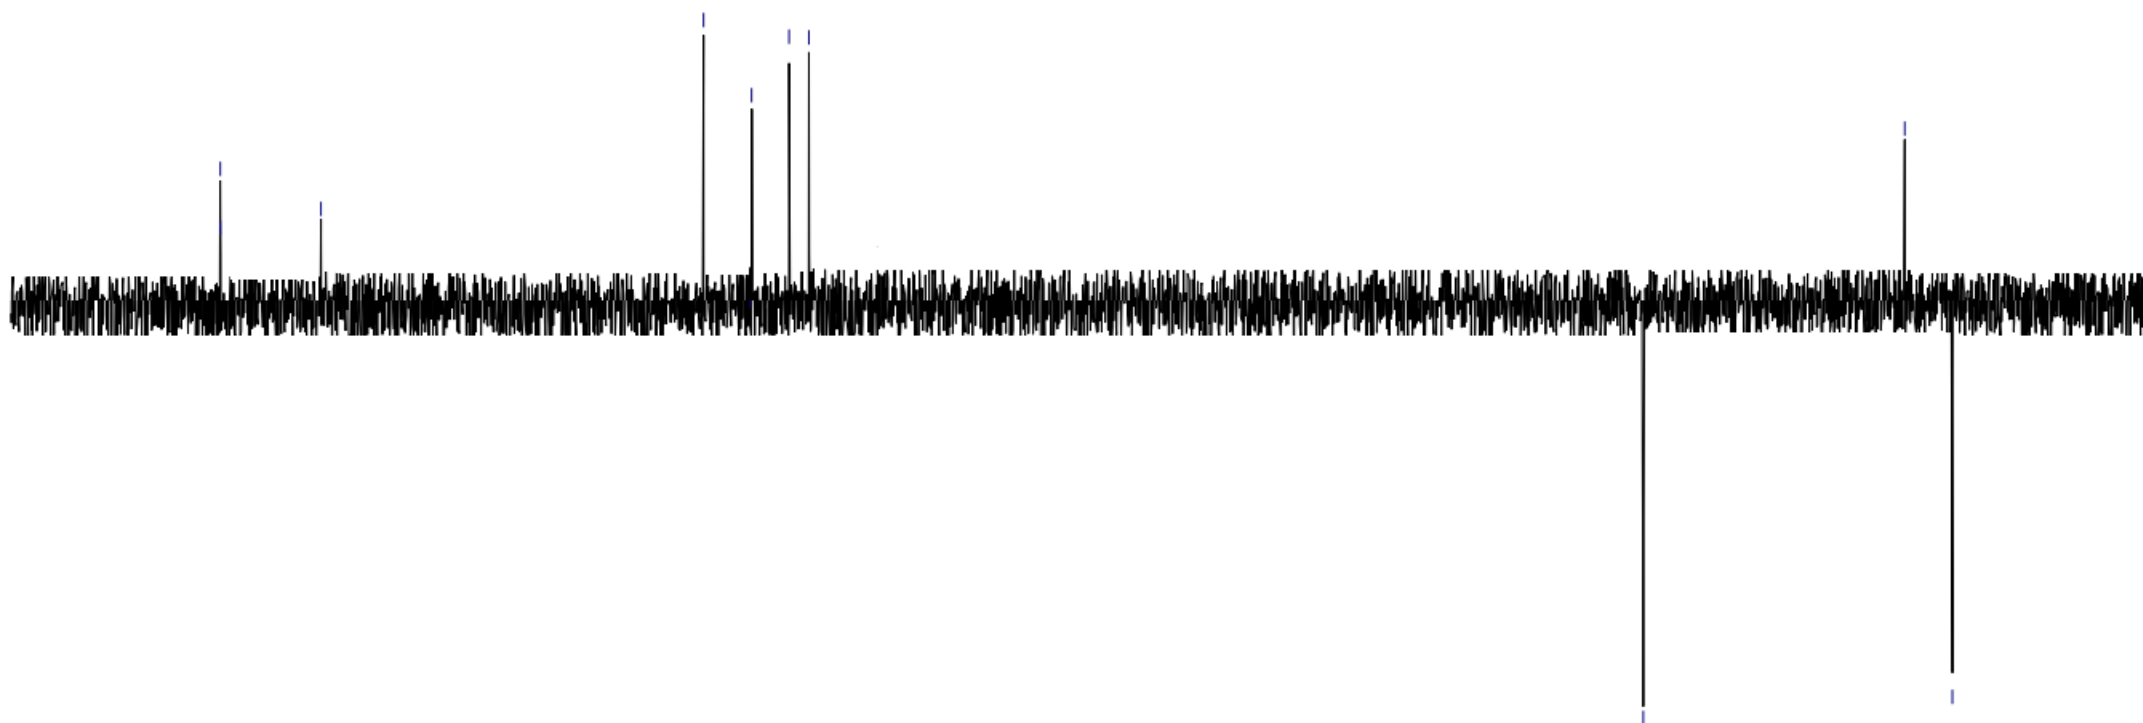

S 15

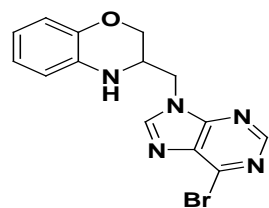

4 e

500 MHz, CDCl<sub>3</sub>

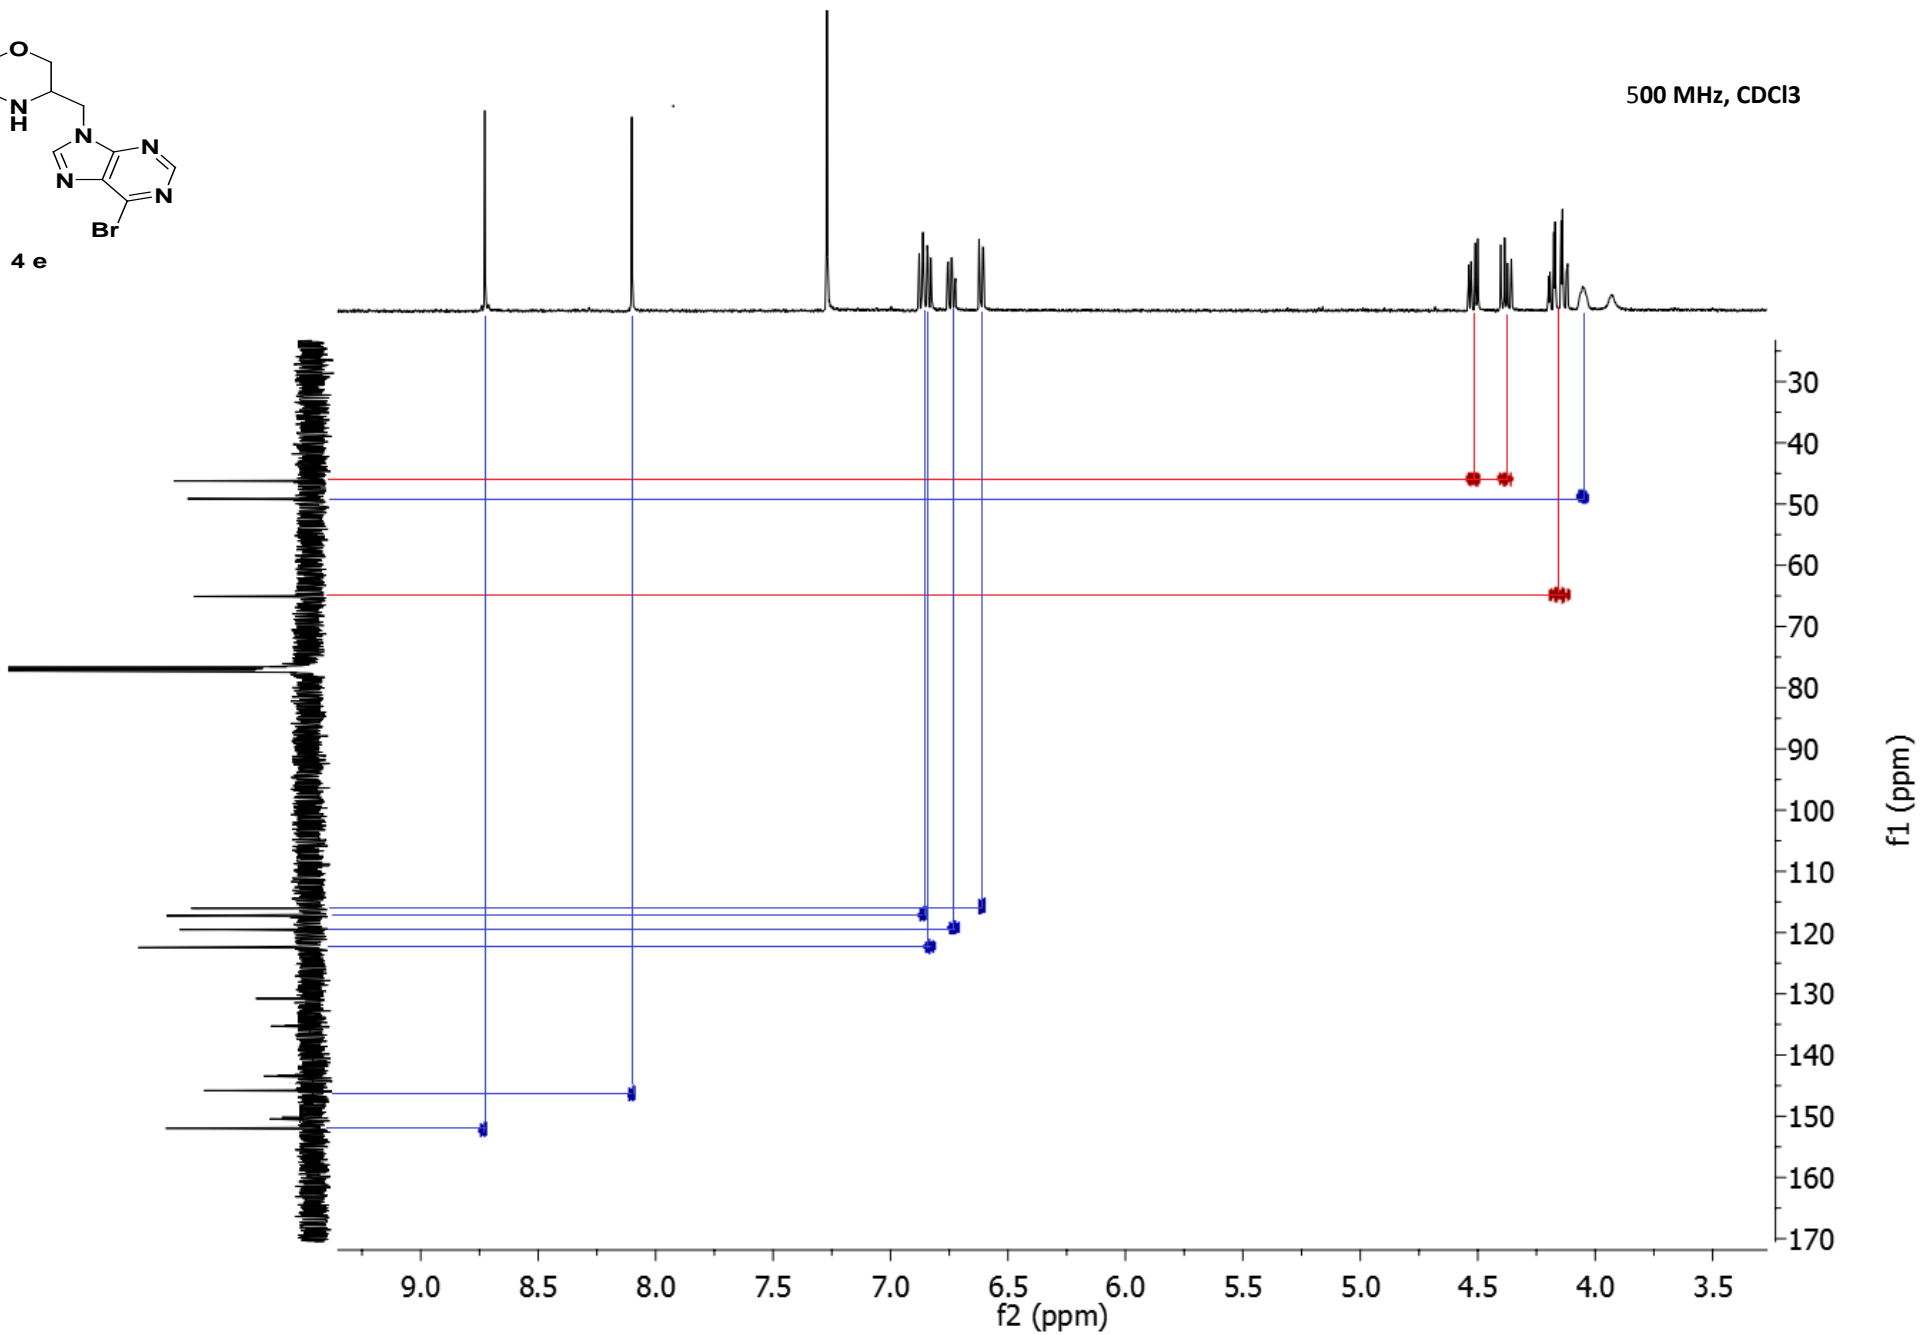

500 MHz, CDCl<sub>3</sub>

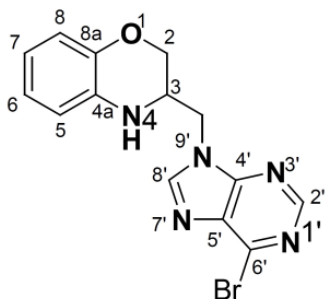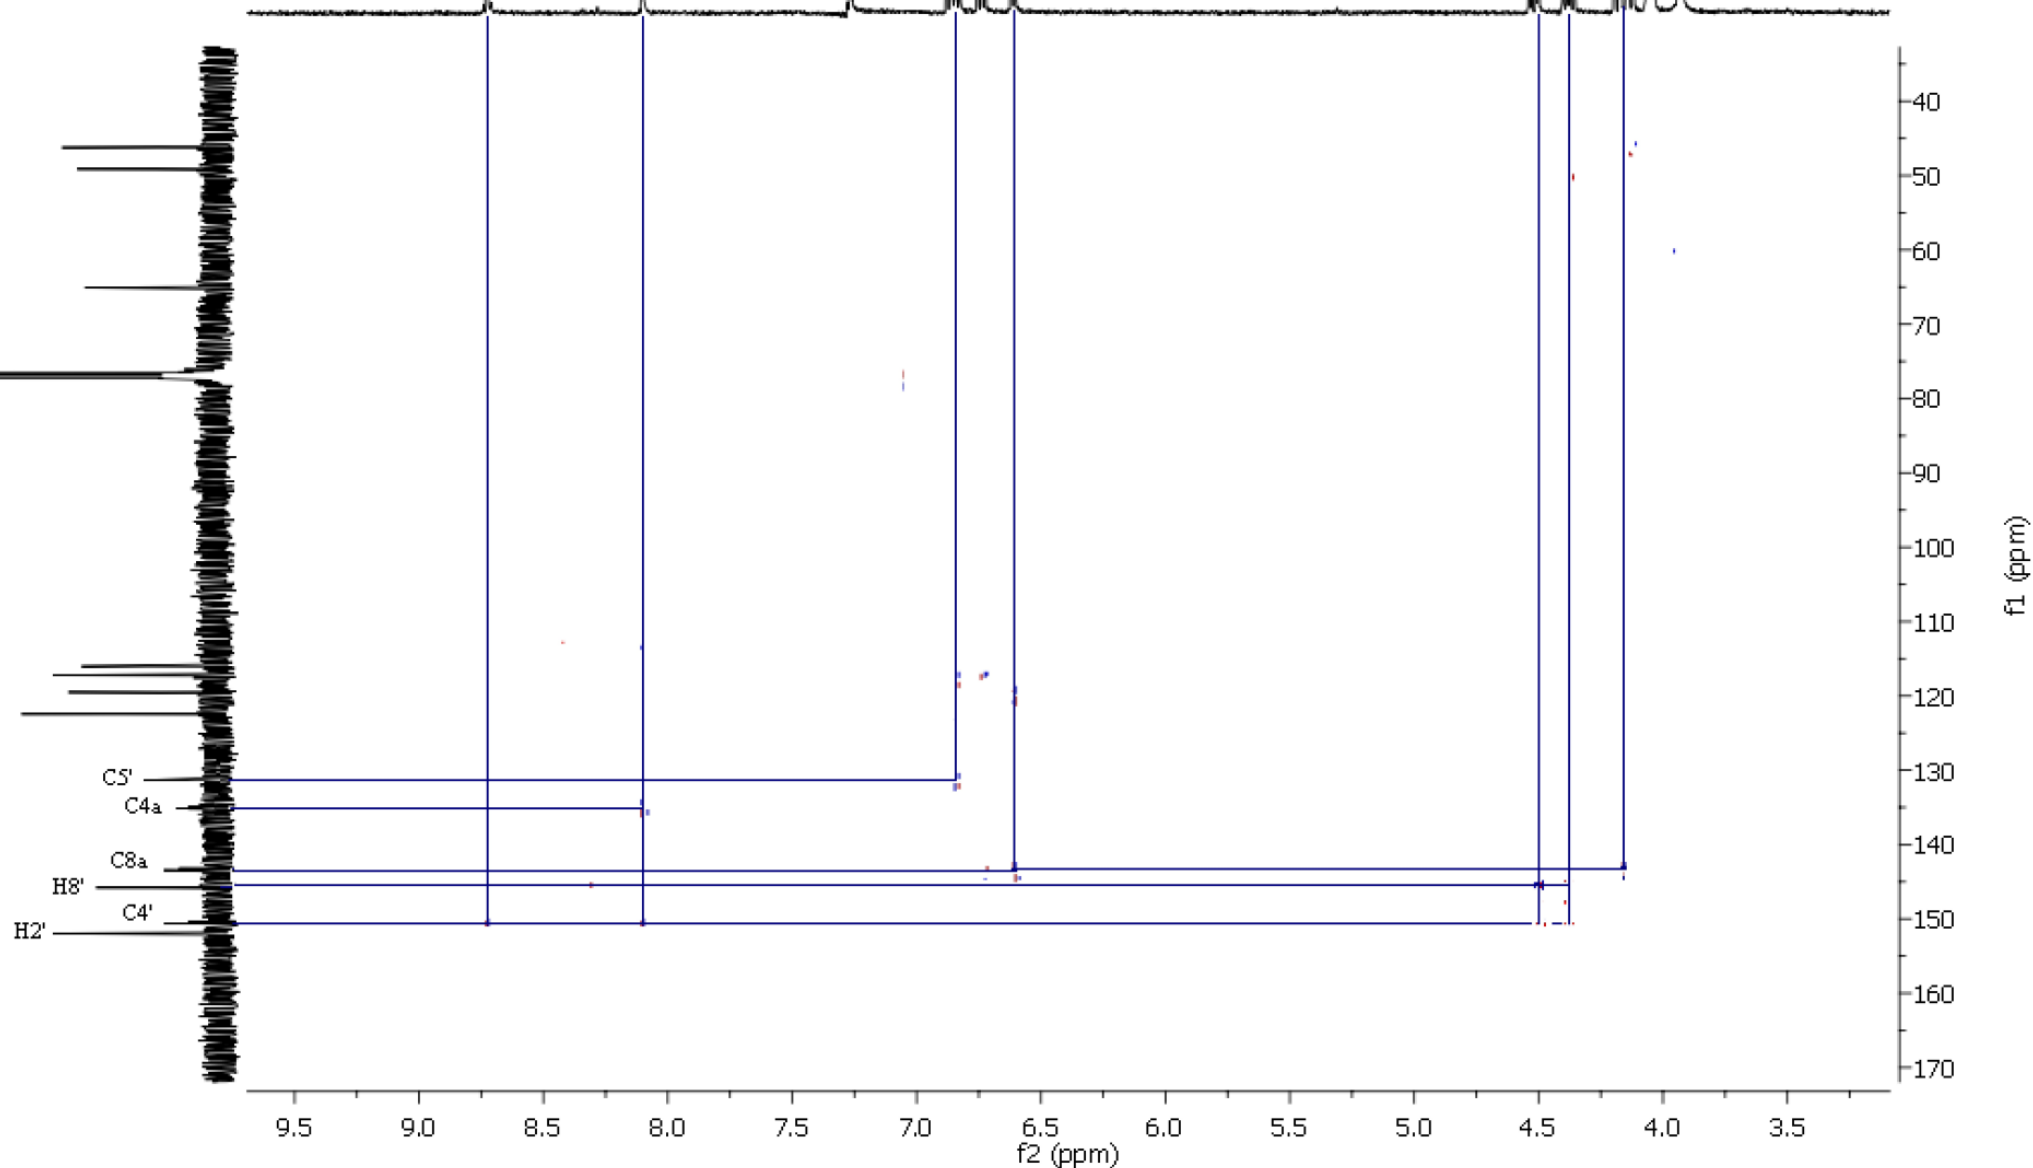



500 MHz, CDCl<sub>3</sub>

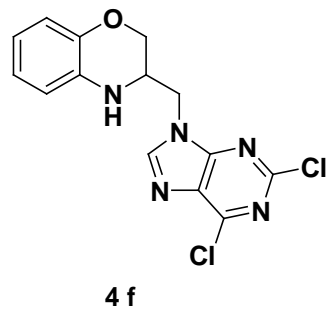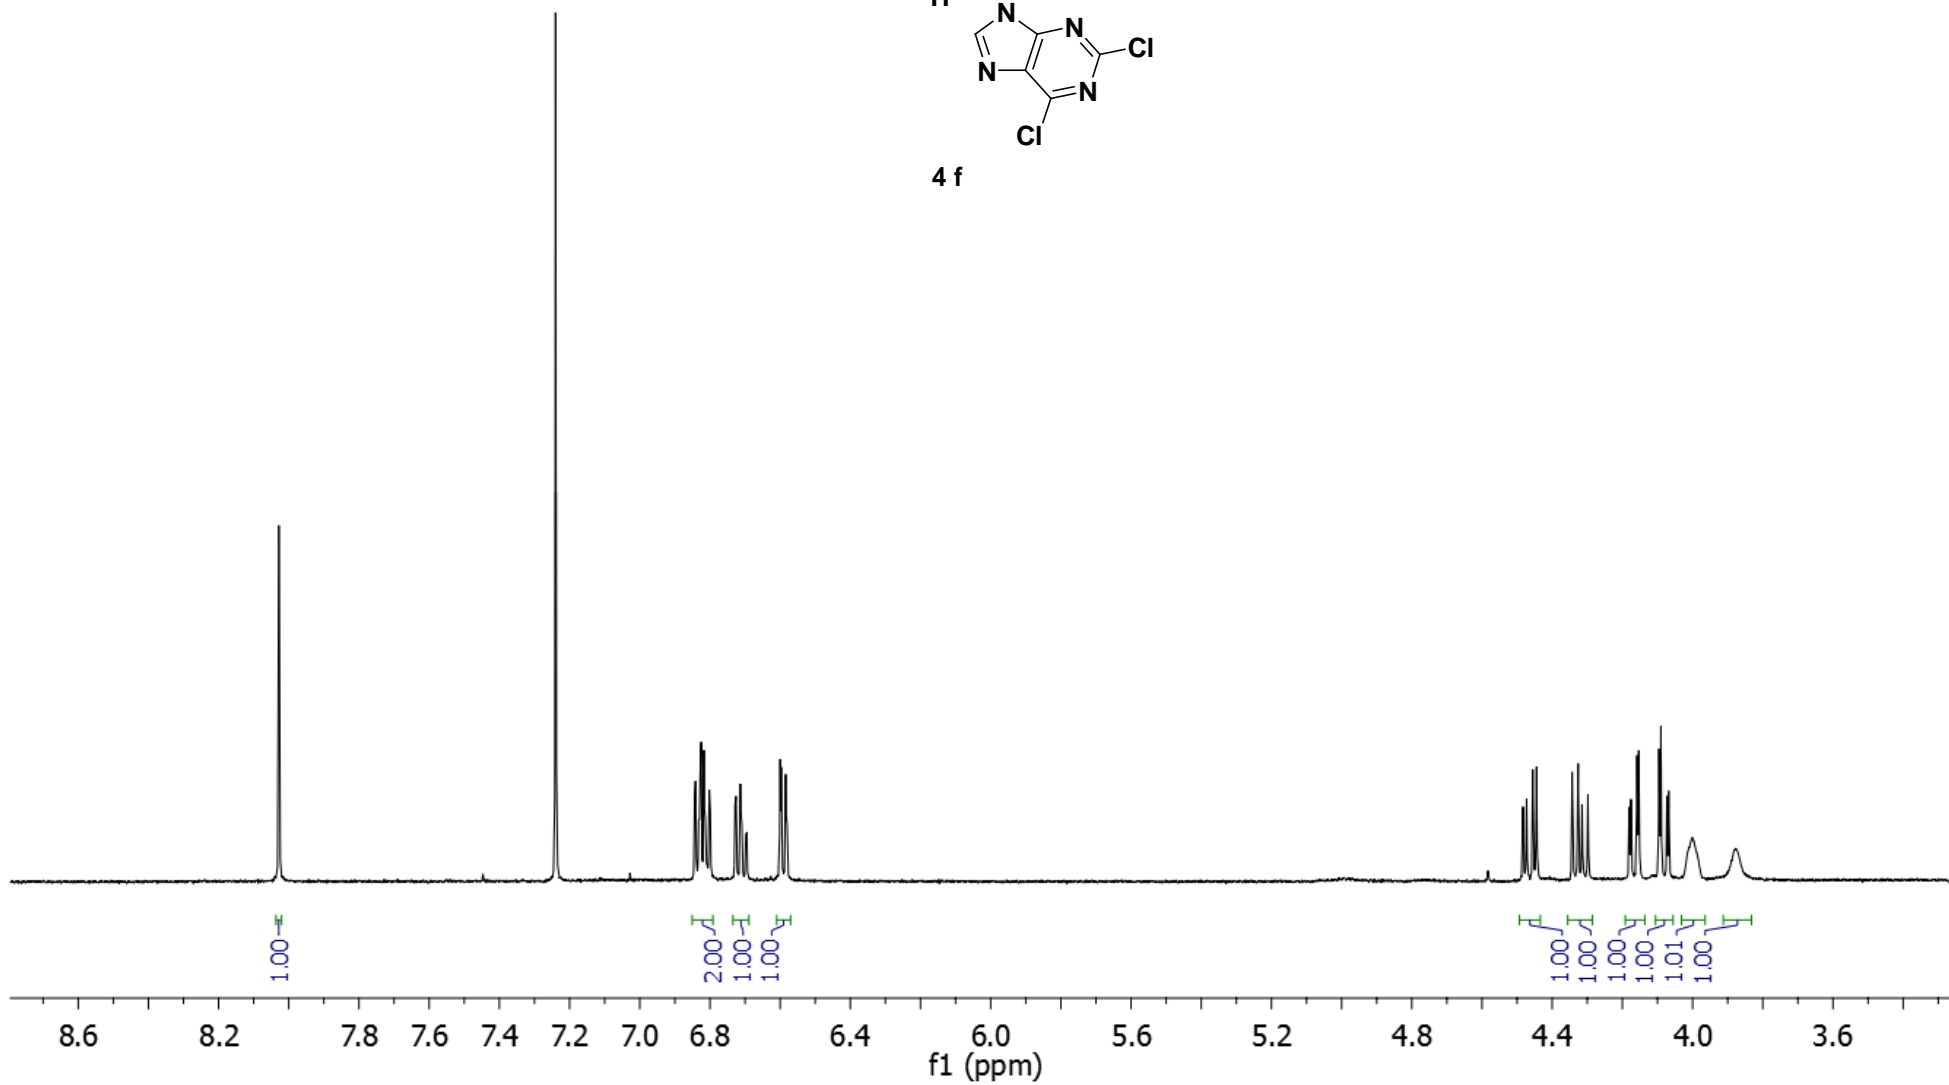

S 18

500 MHz, CDCl<sub>3</sub>

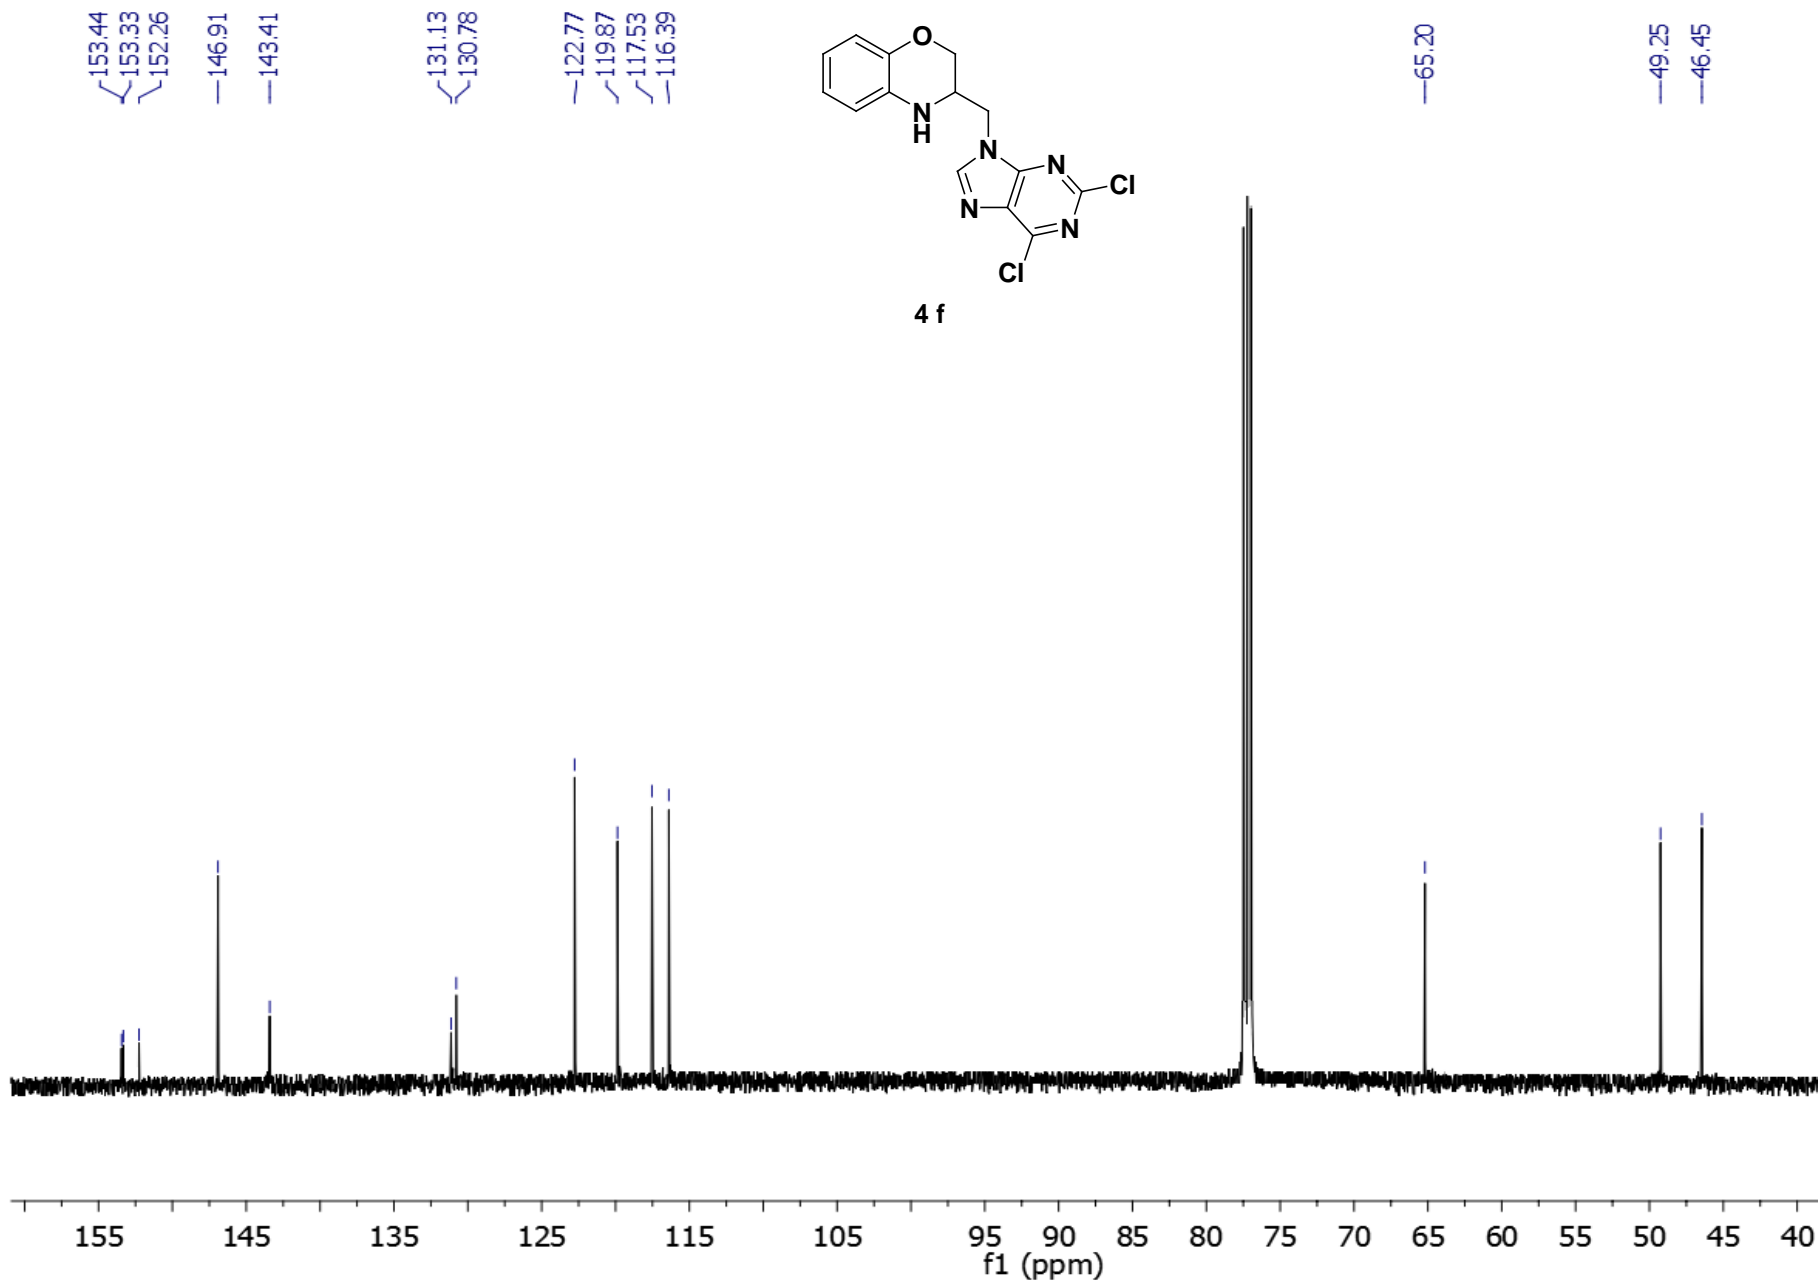

S 19

500 MHz, CDCl<sub>3</sub>

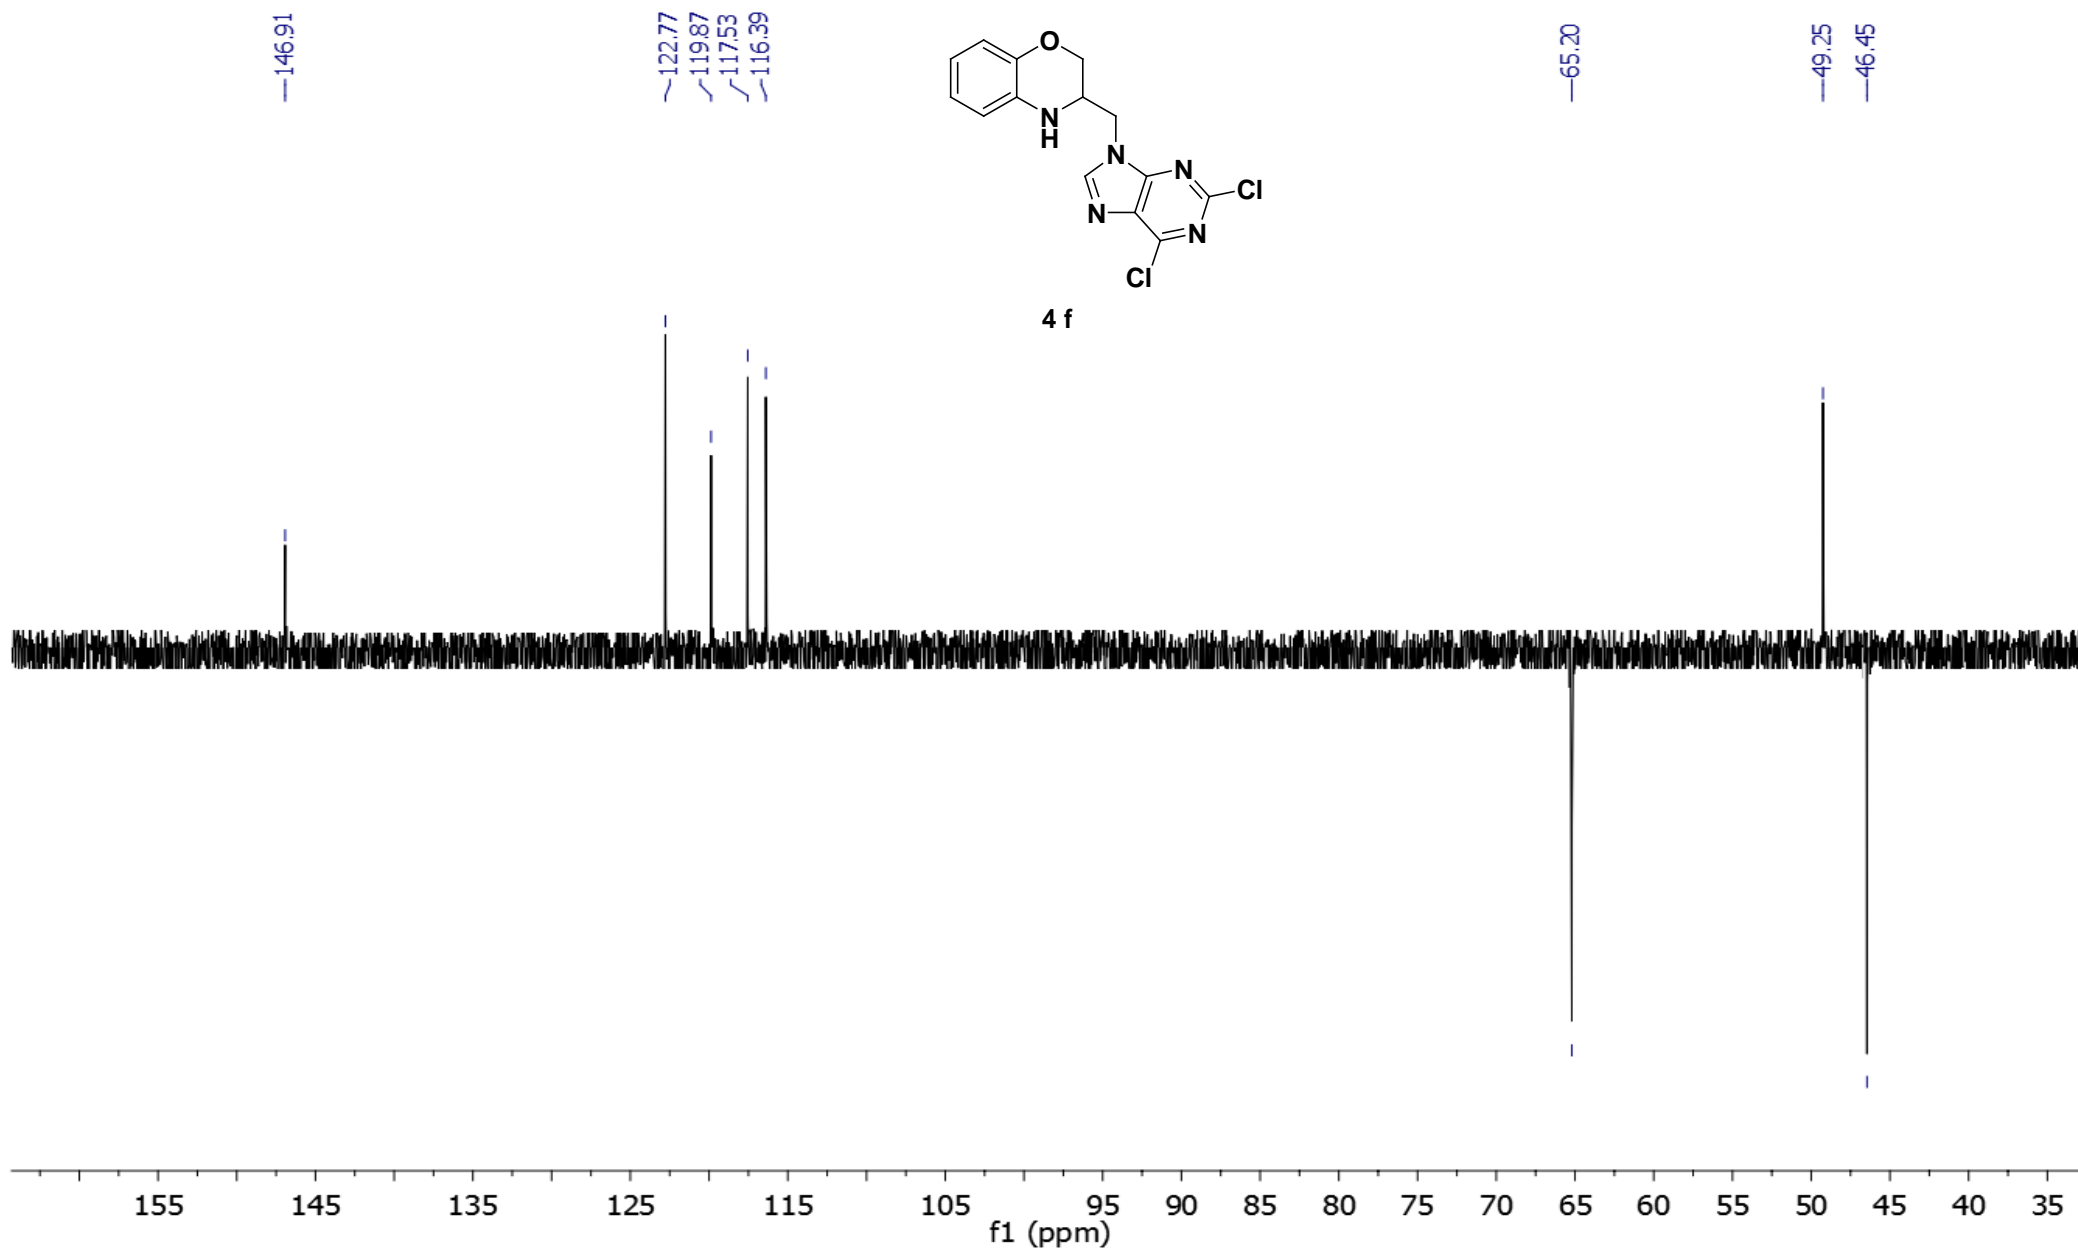

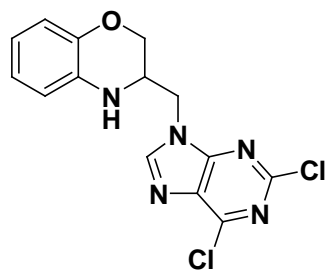

4 f

S 20

500 MHz, CDCl<sub>3</sub>

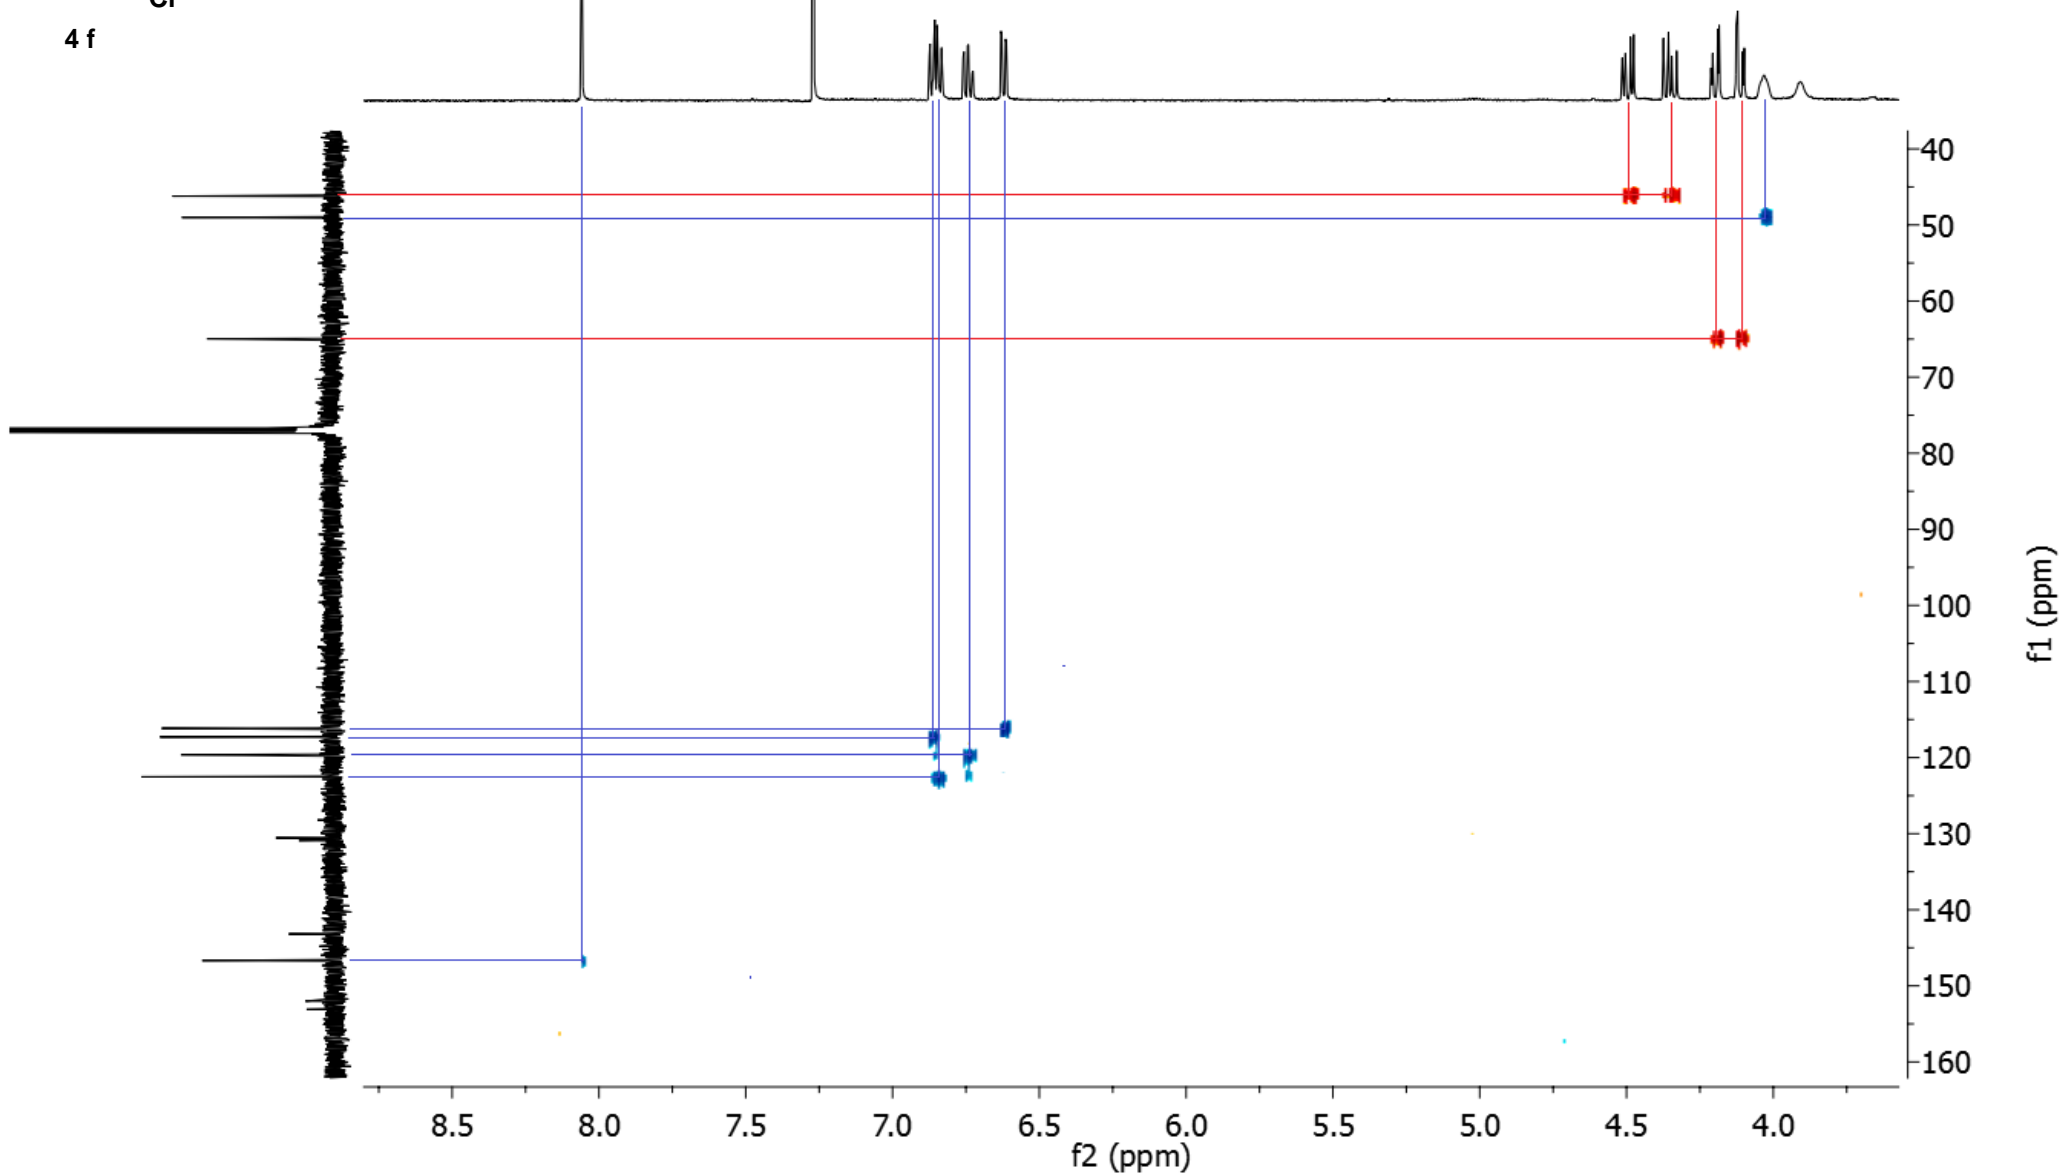

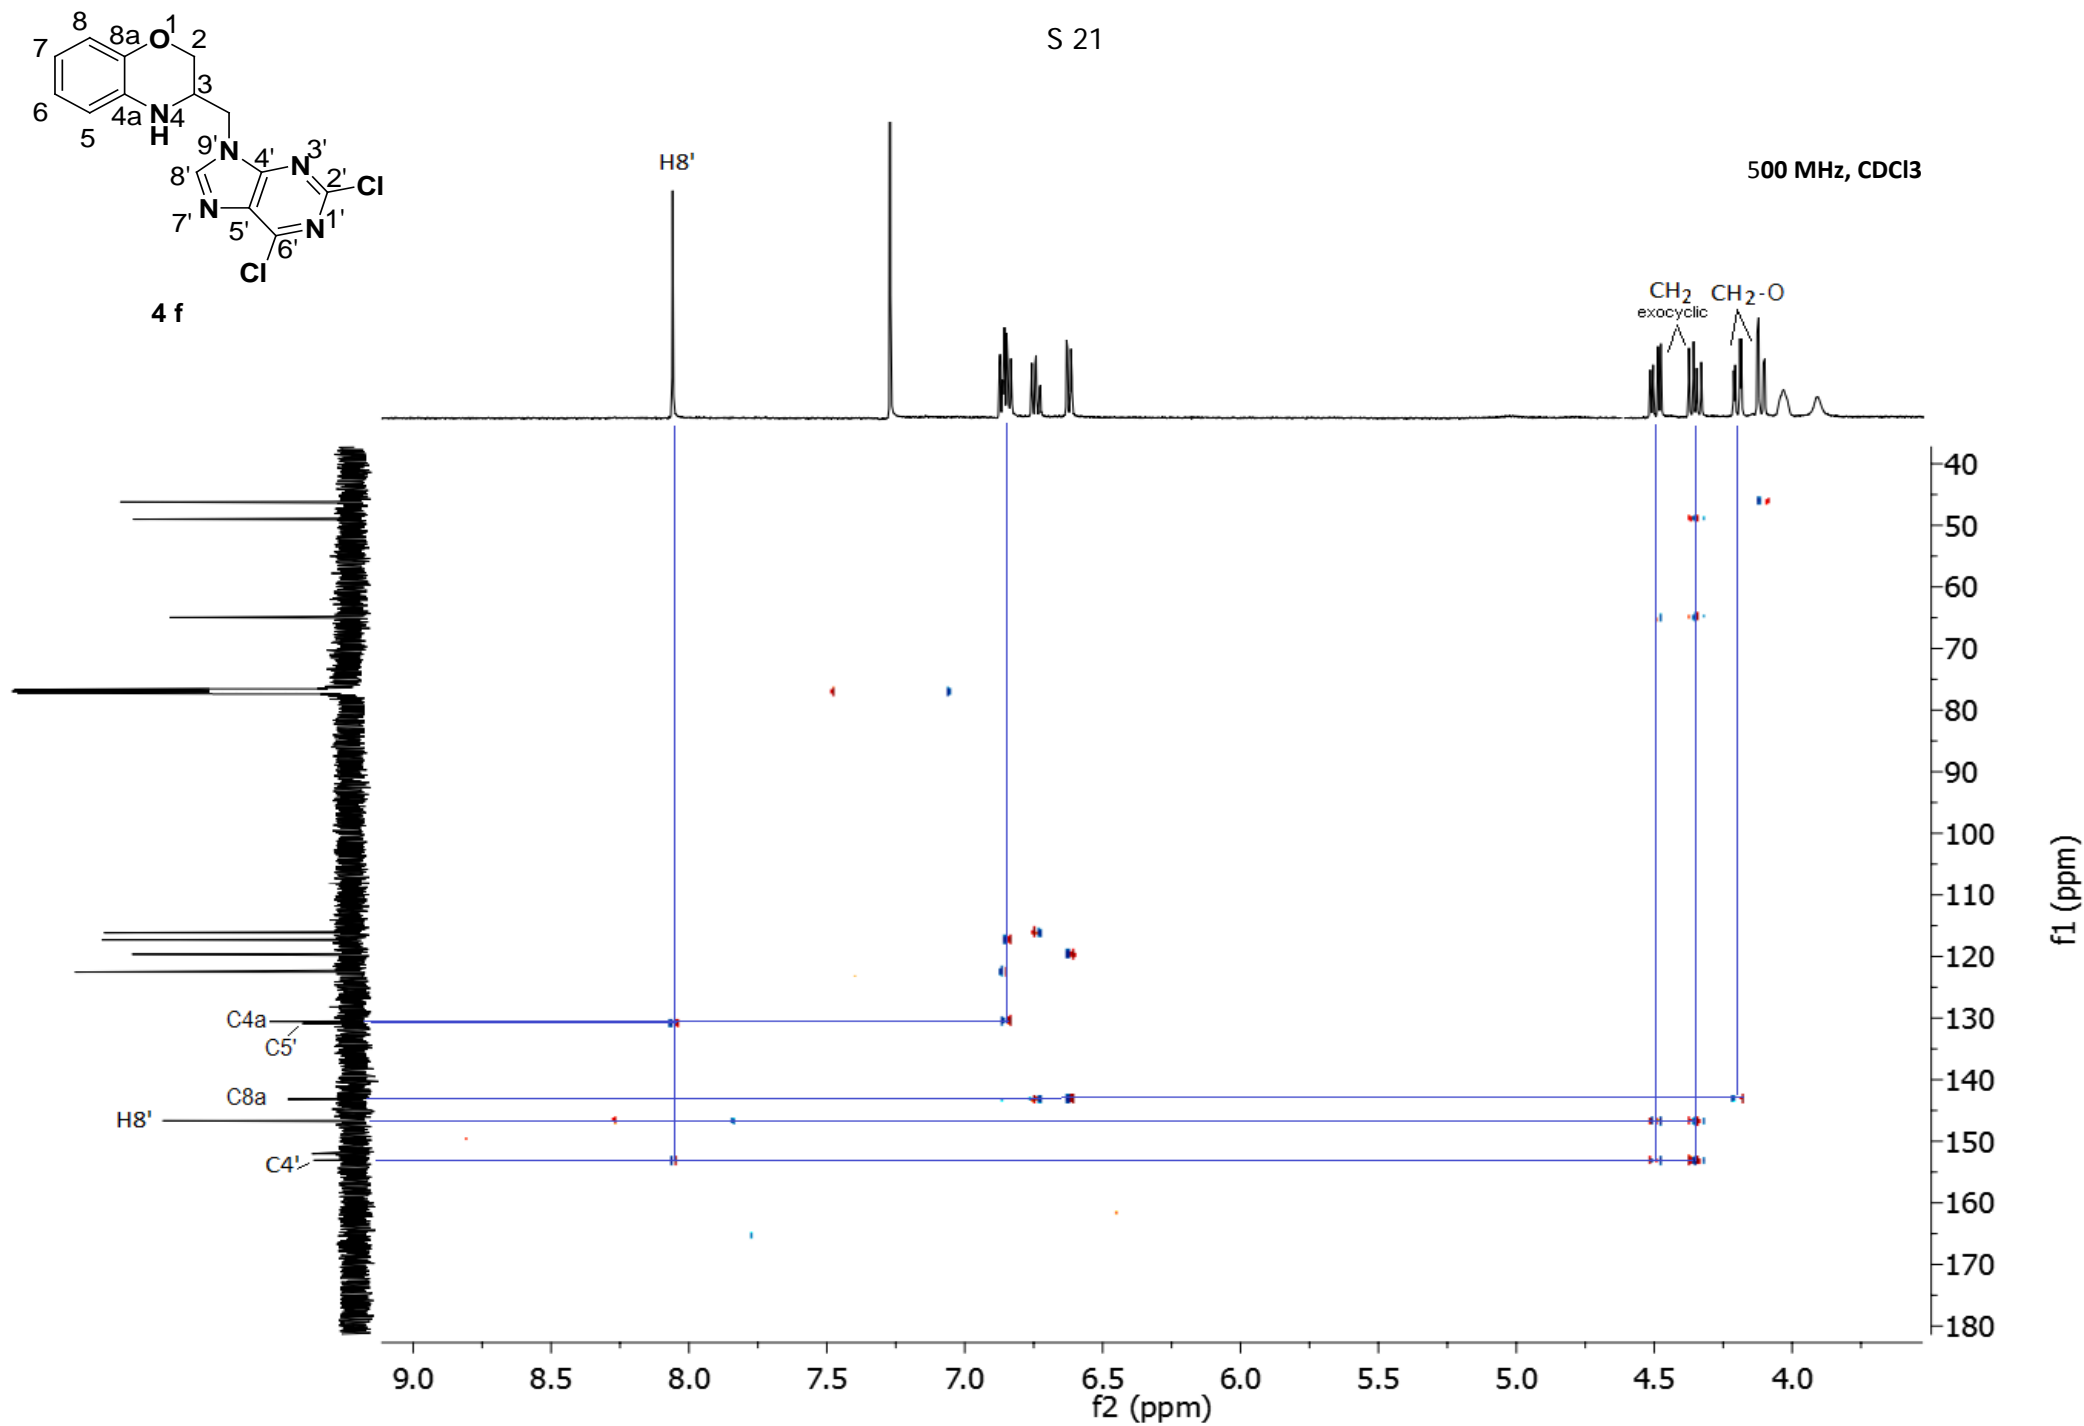

S 22

500 MHz, CDCl<sub>3</sub>

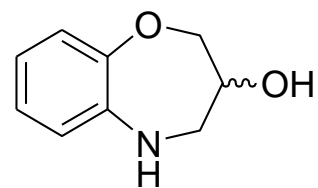

5a

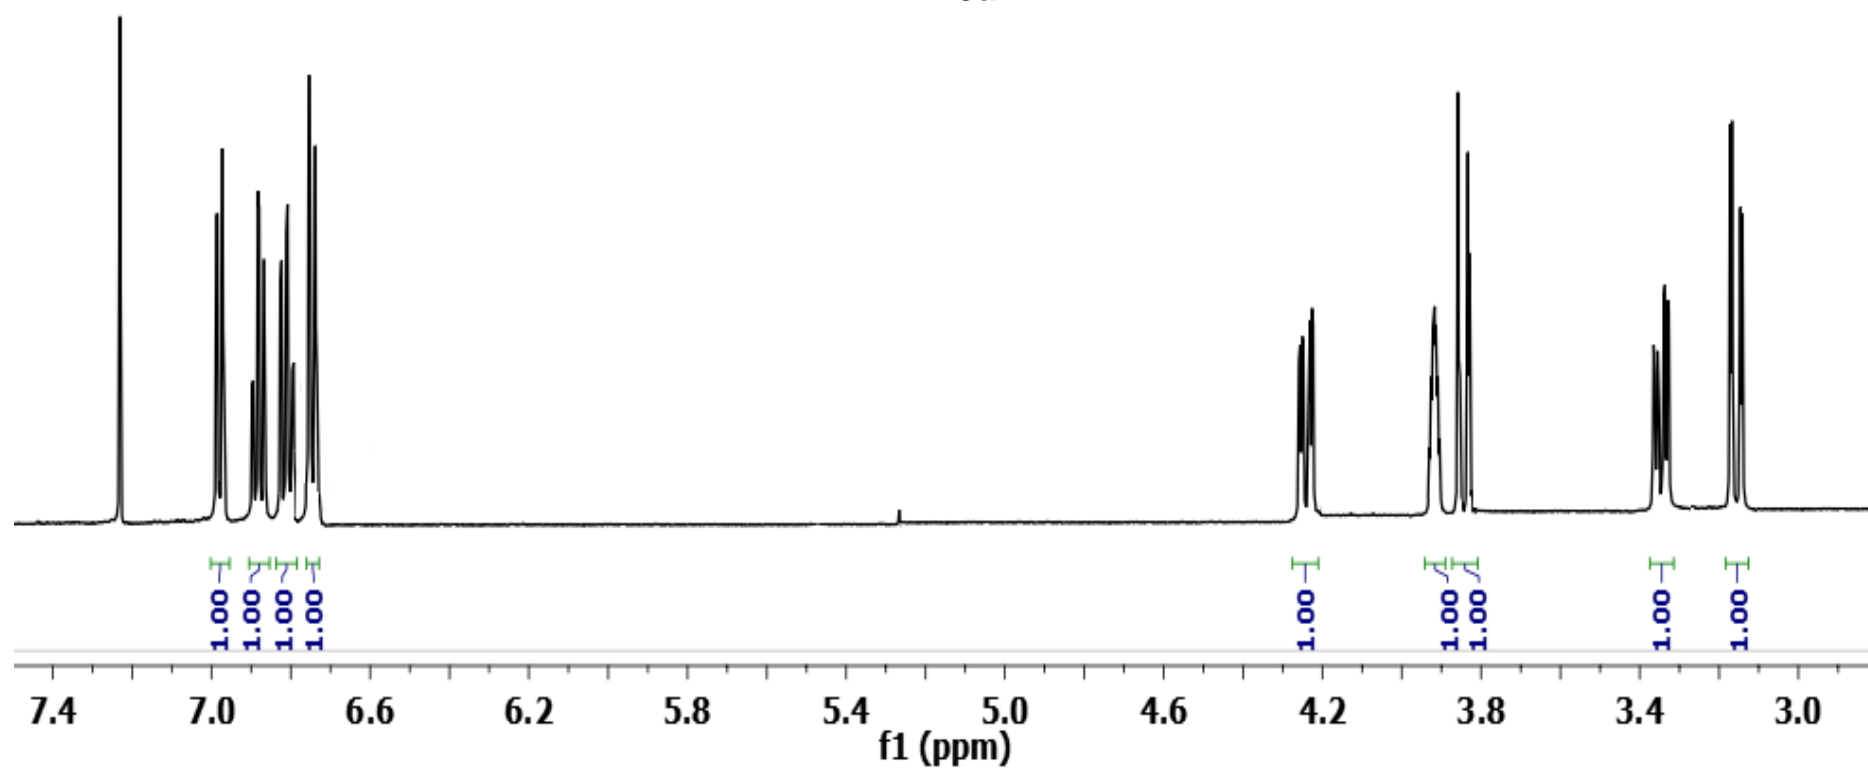

S 23

500 MHz, CDCl<sub>3</sub>

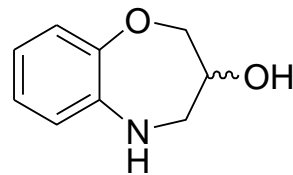

5a

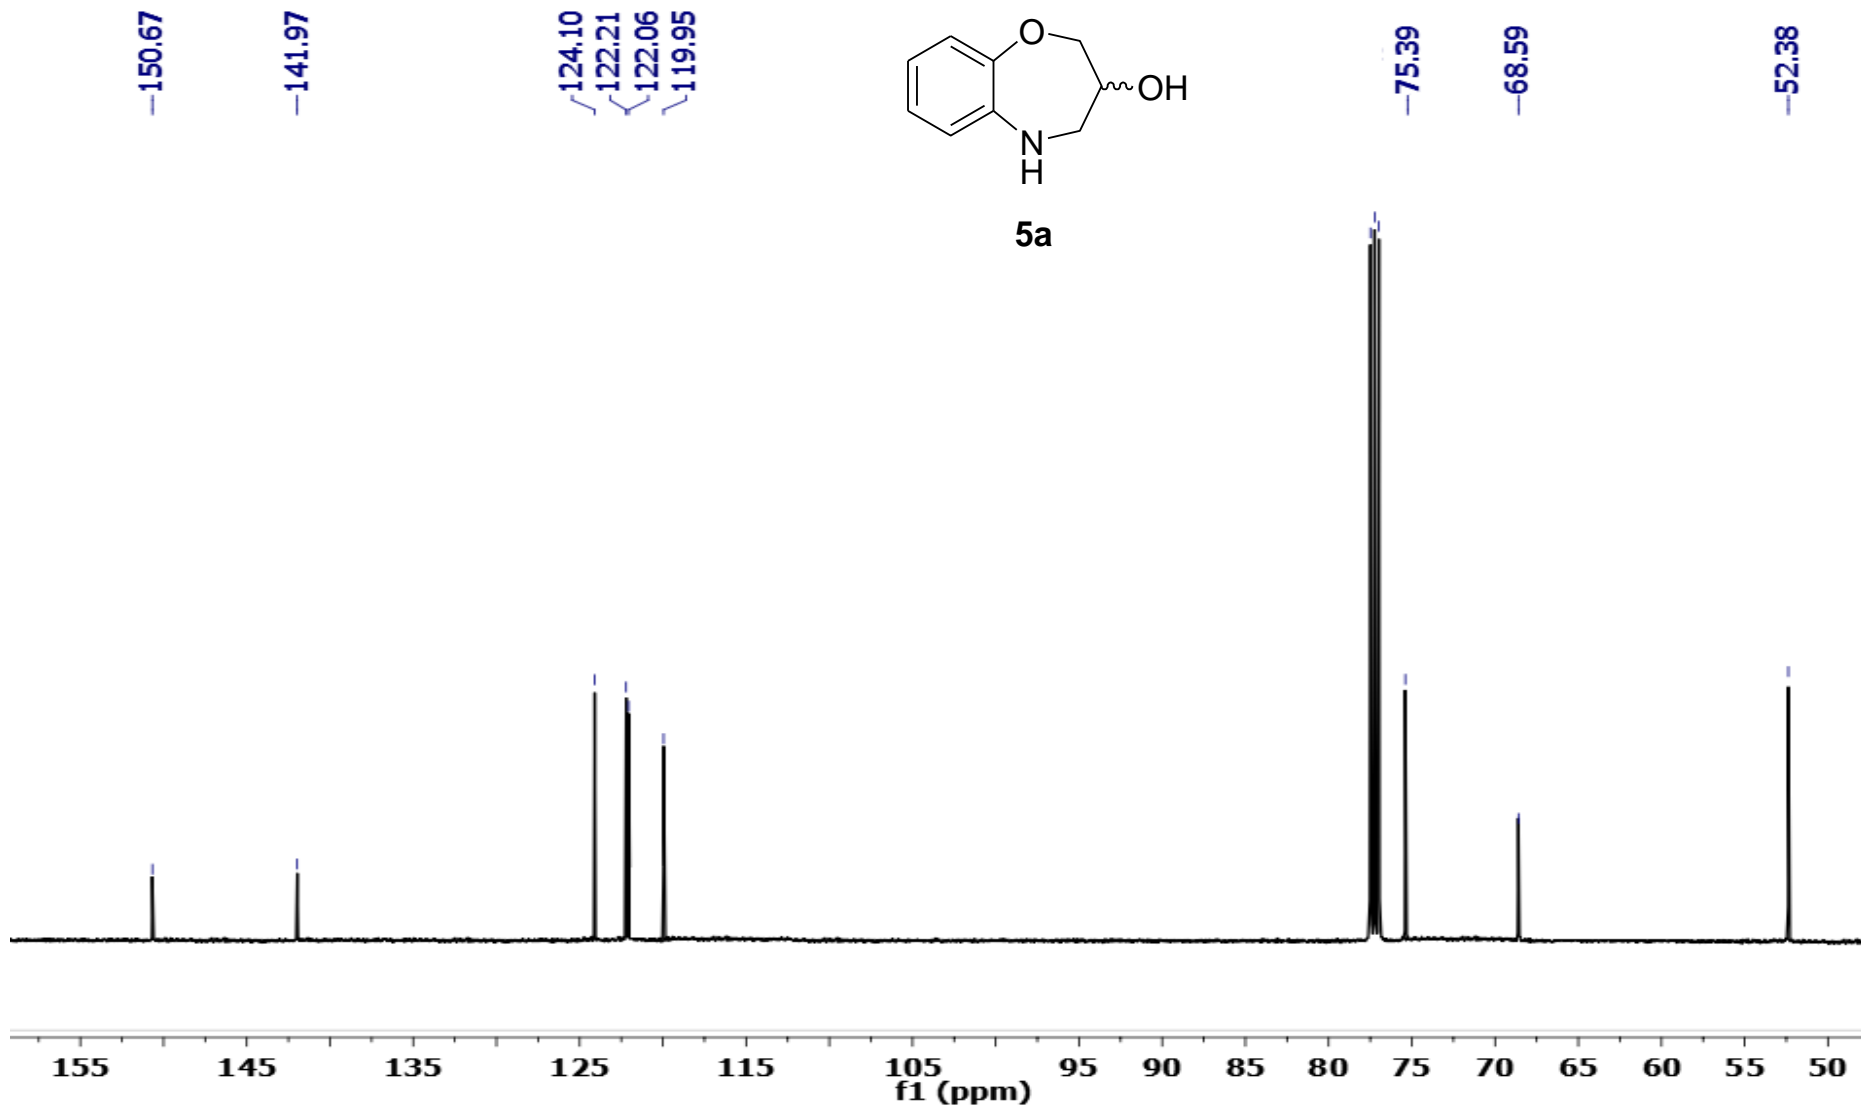

S 24

500 MHz, CDCl<sub>3</sub>

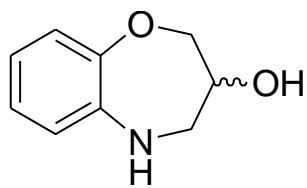

5a

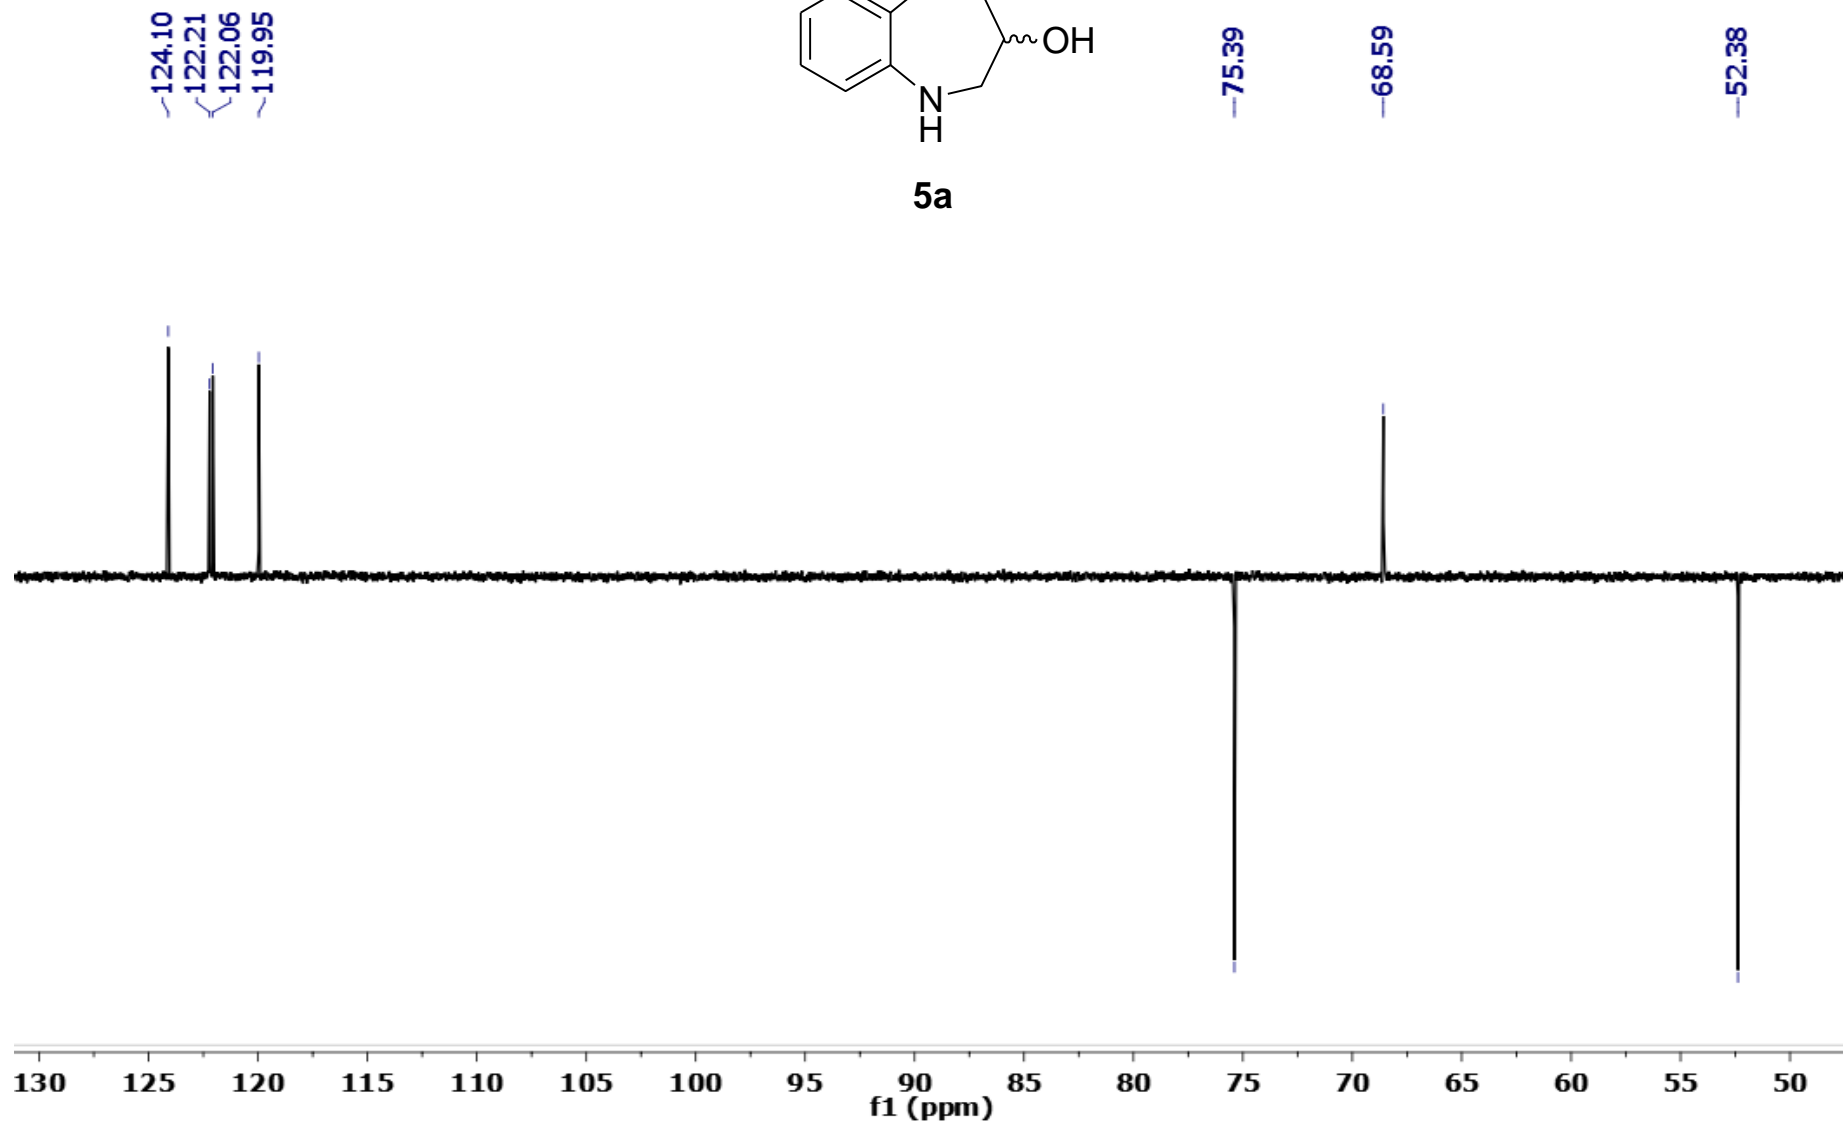



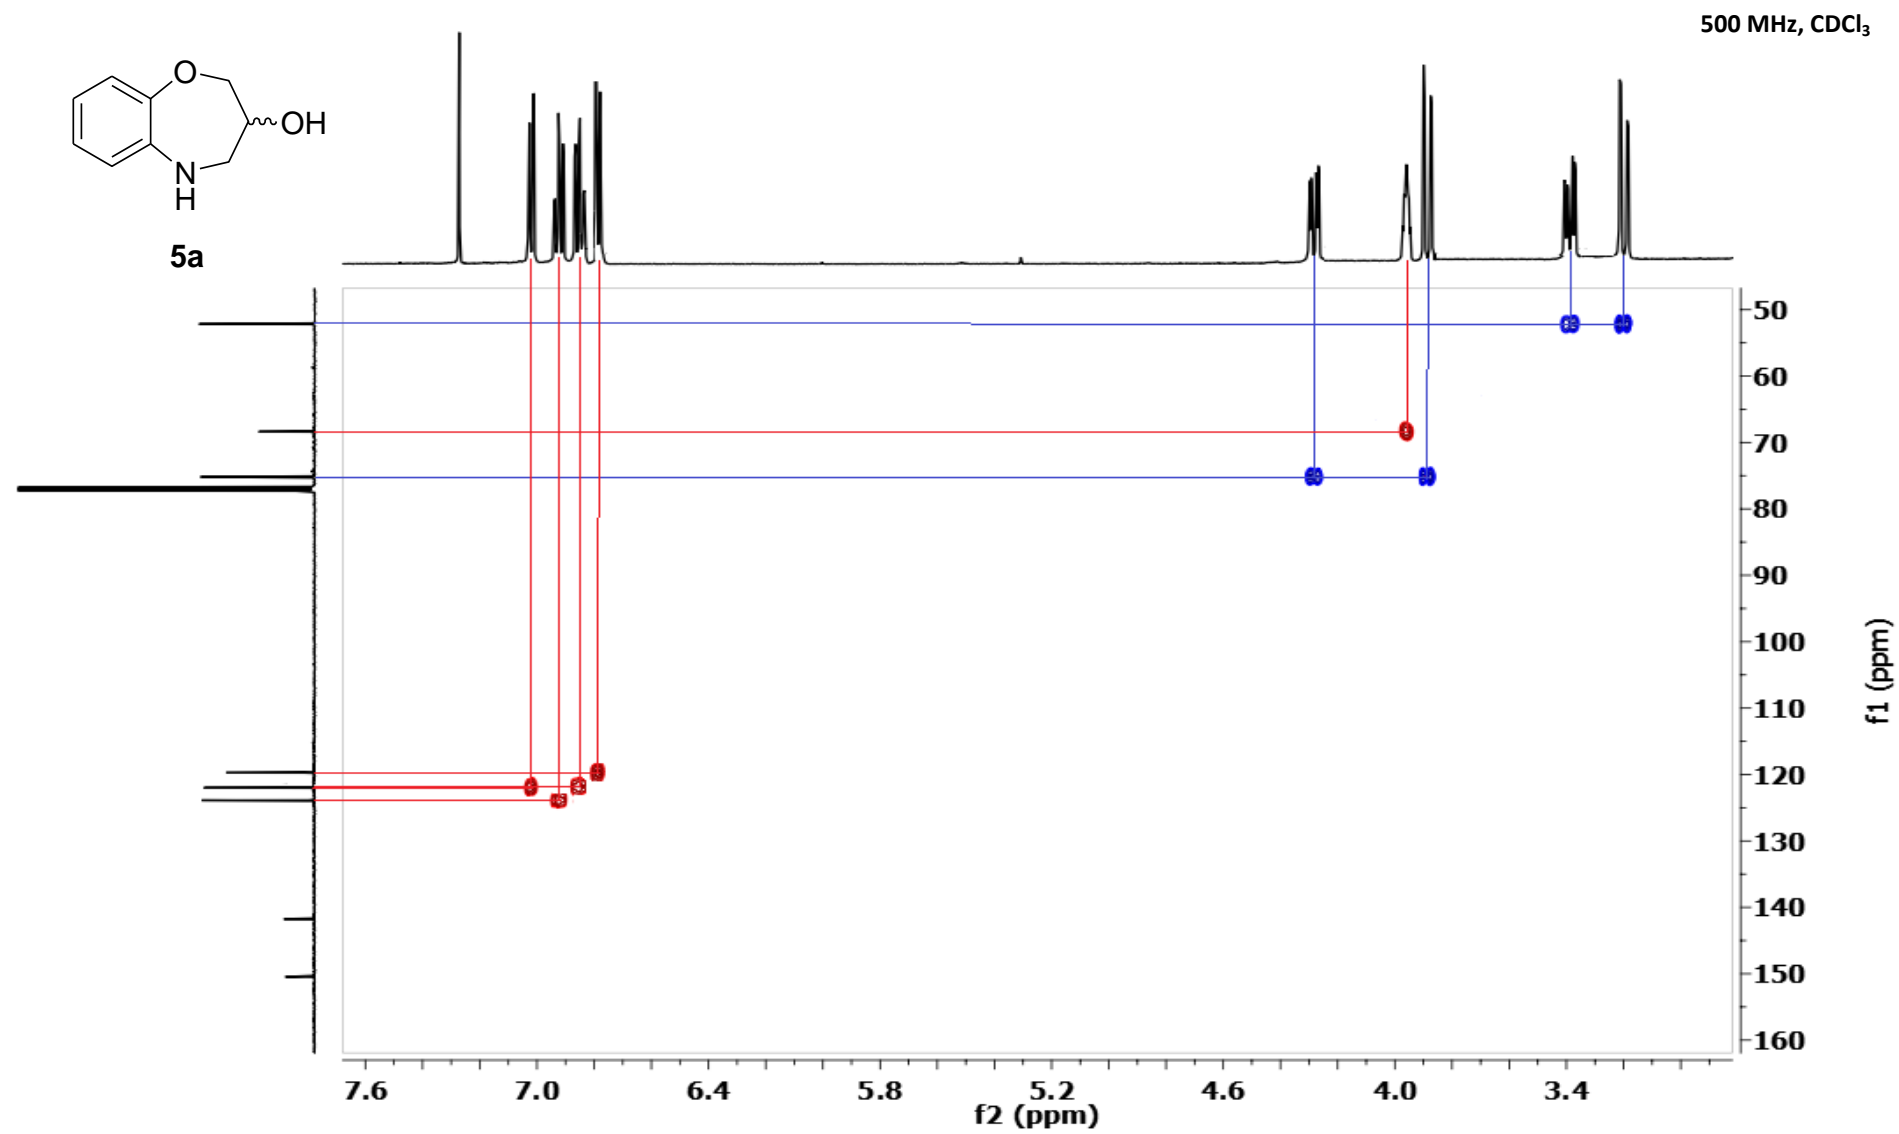

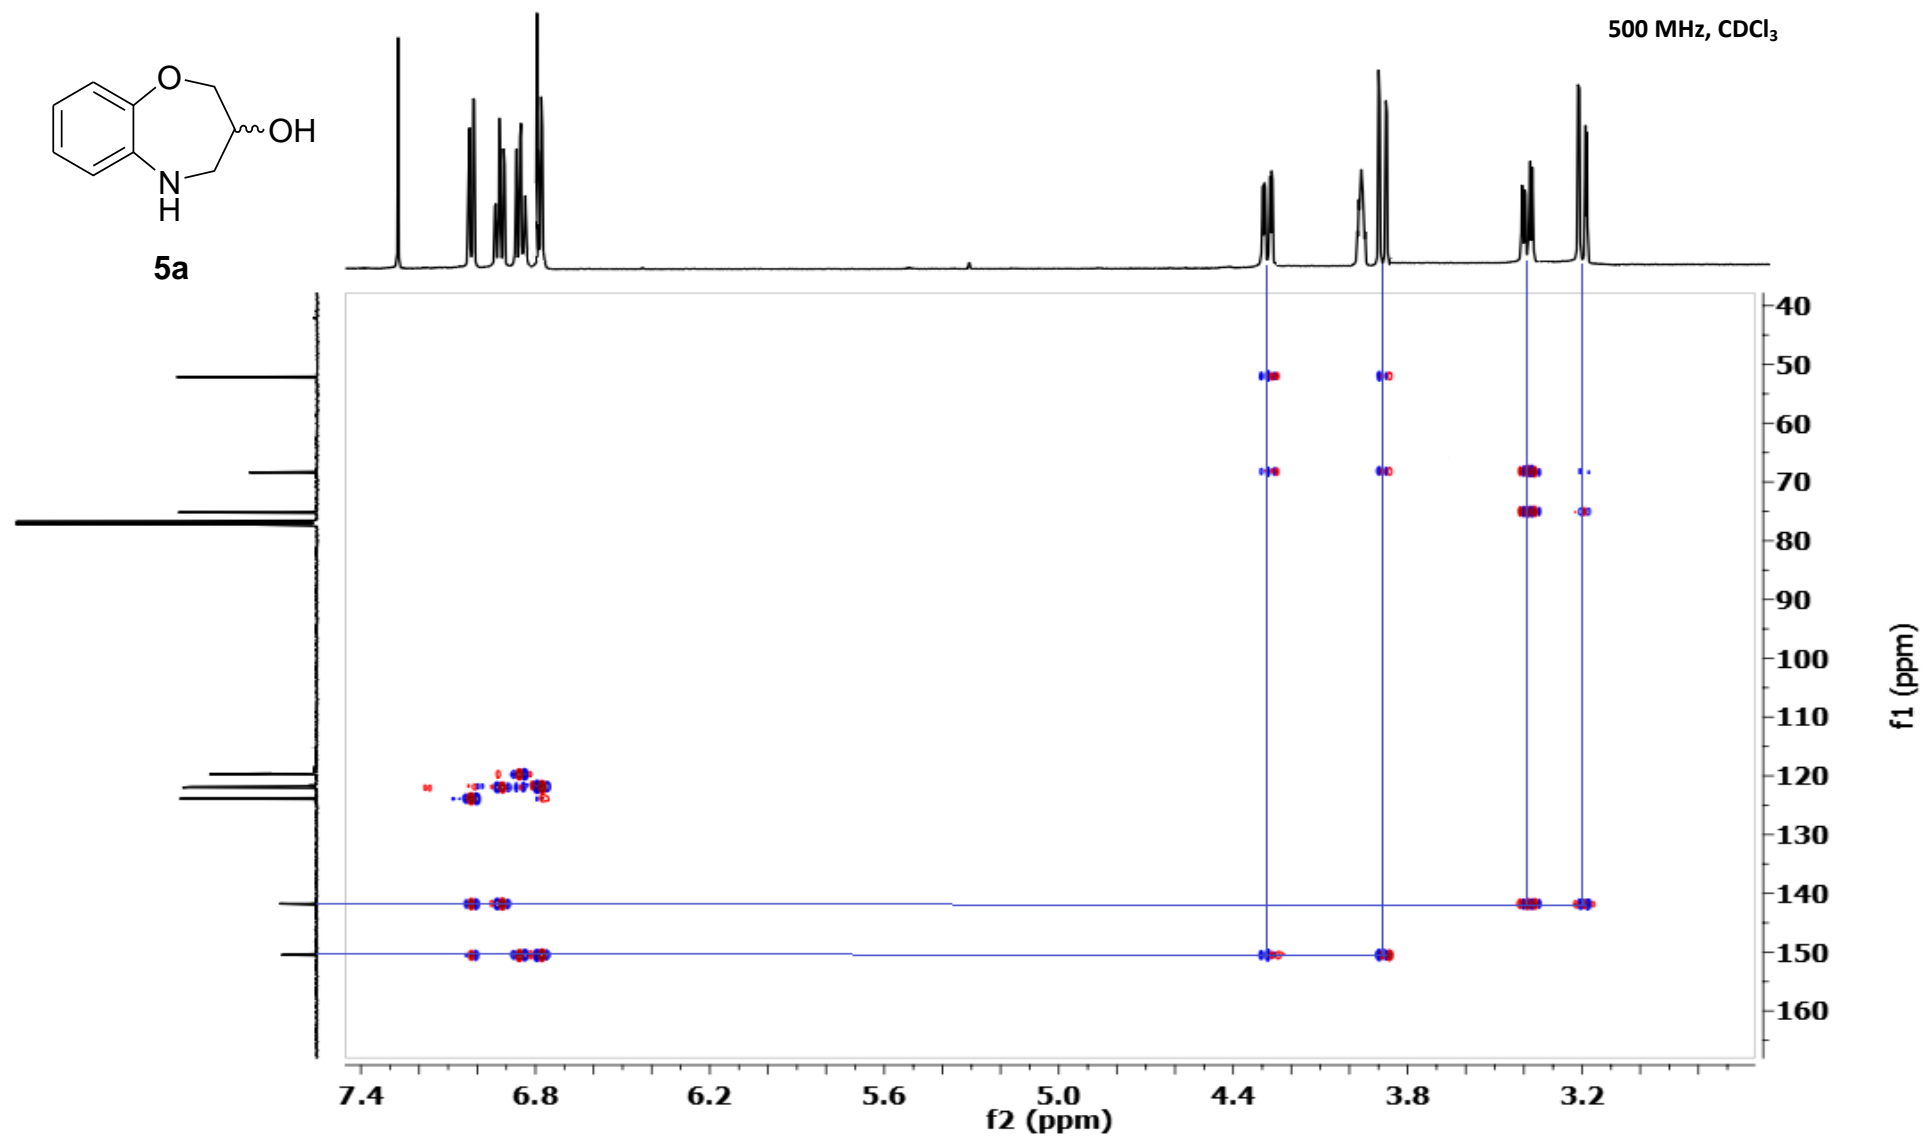

S 27

400 MHz, CDCl<sub>3</sub>

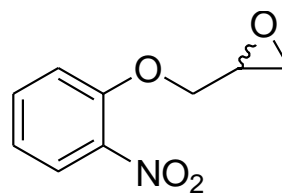

6

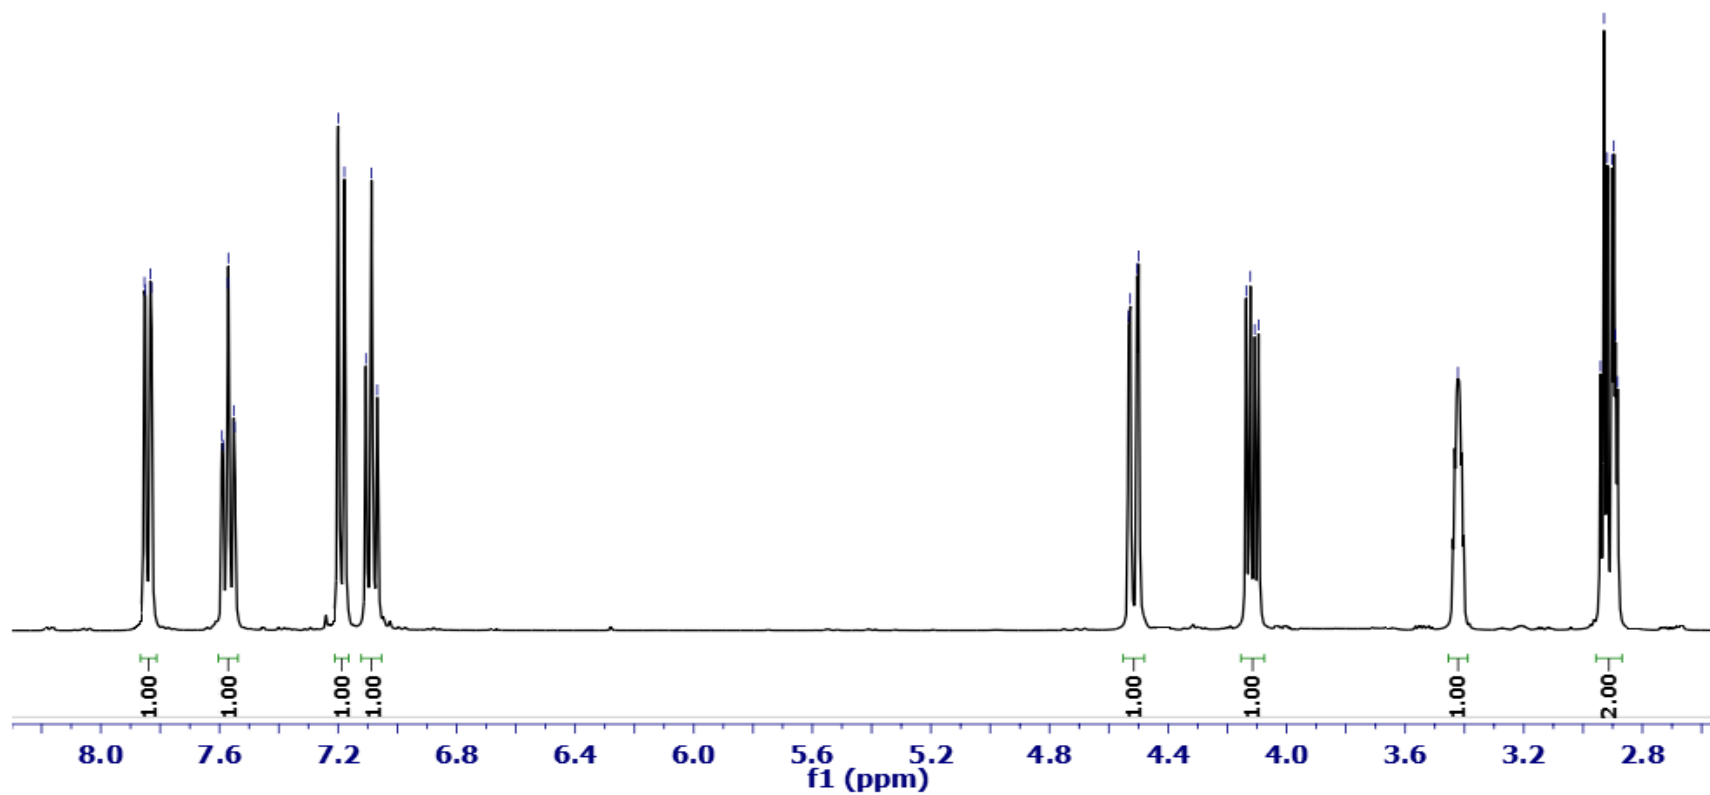

S 28

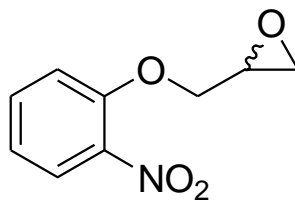

400 MHz,  $\text{CDCl}_3$

**6**

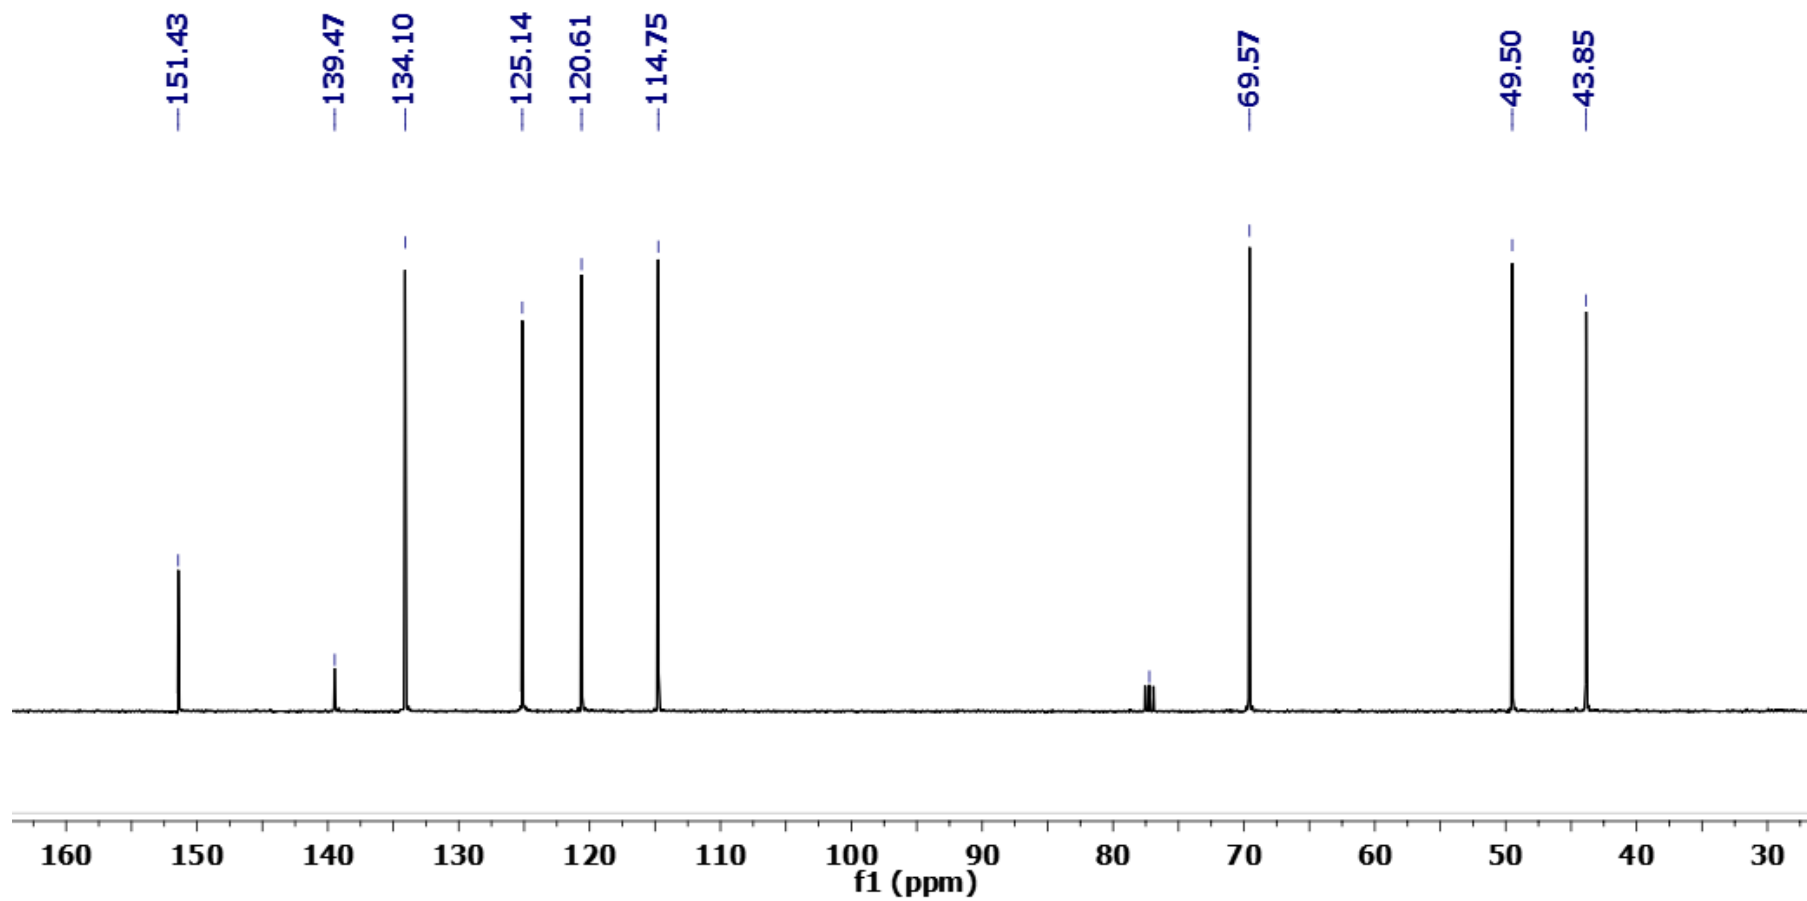

S 29

400 MHz, CDCl<sub>3</sub>

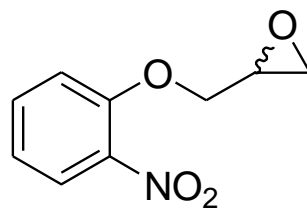

6

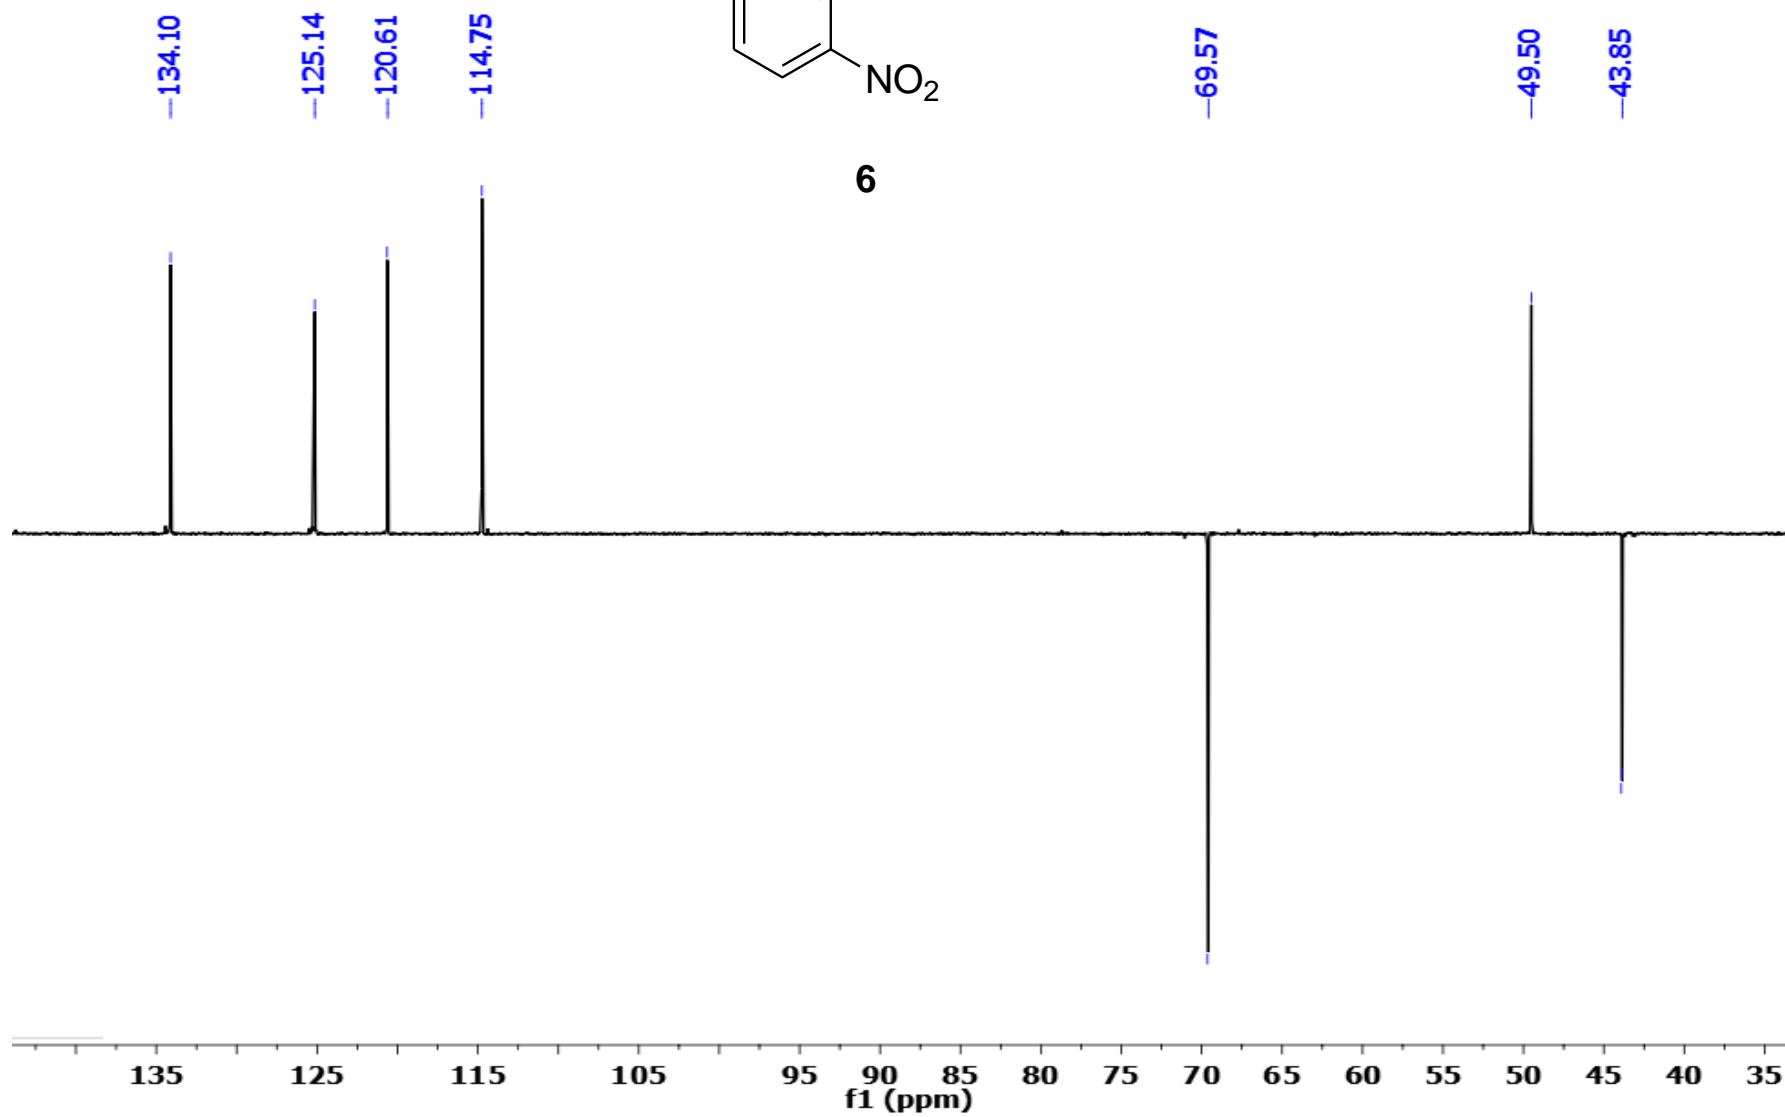

S 30

400 MHz, CDCl<sub>3</sub>

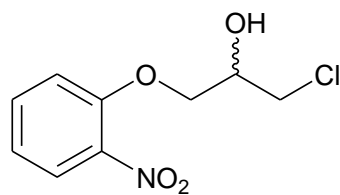

7

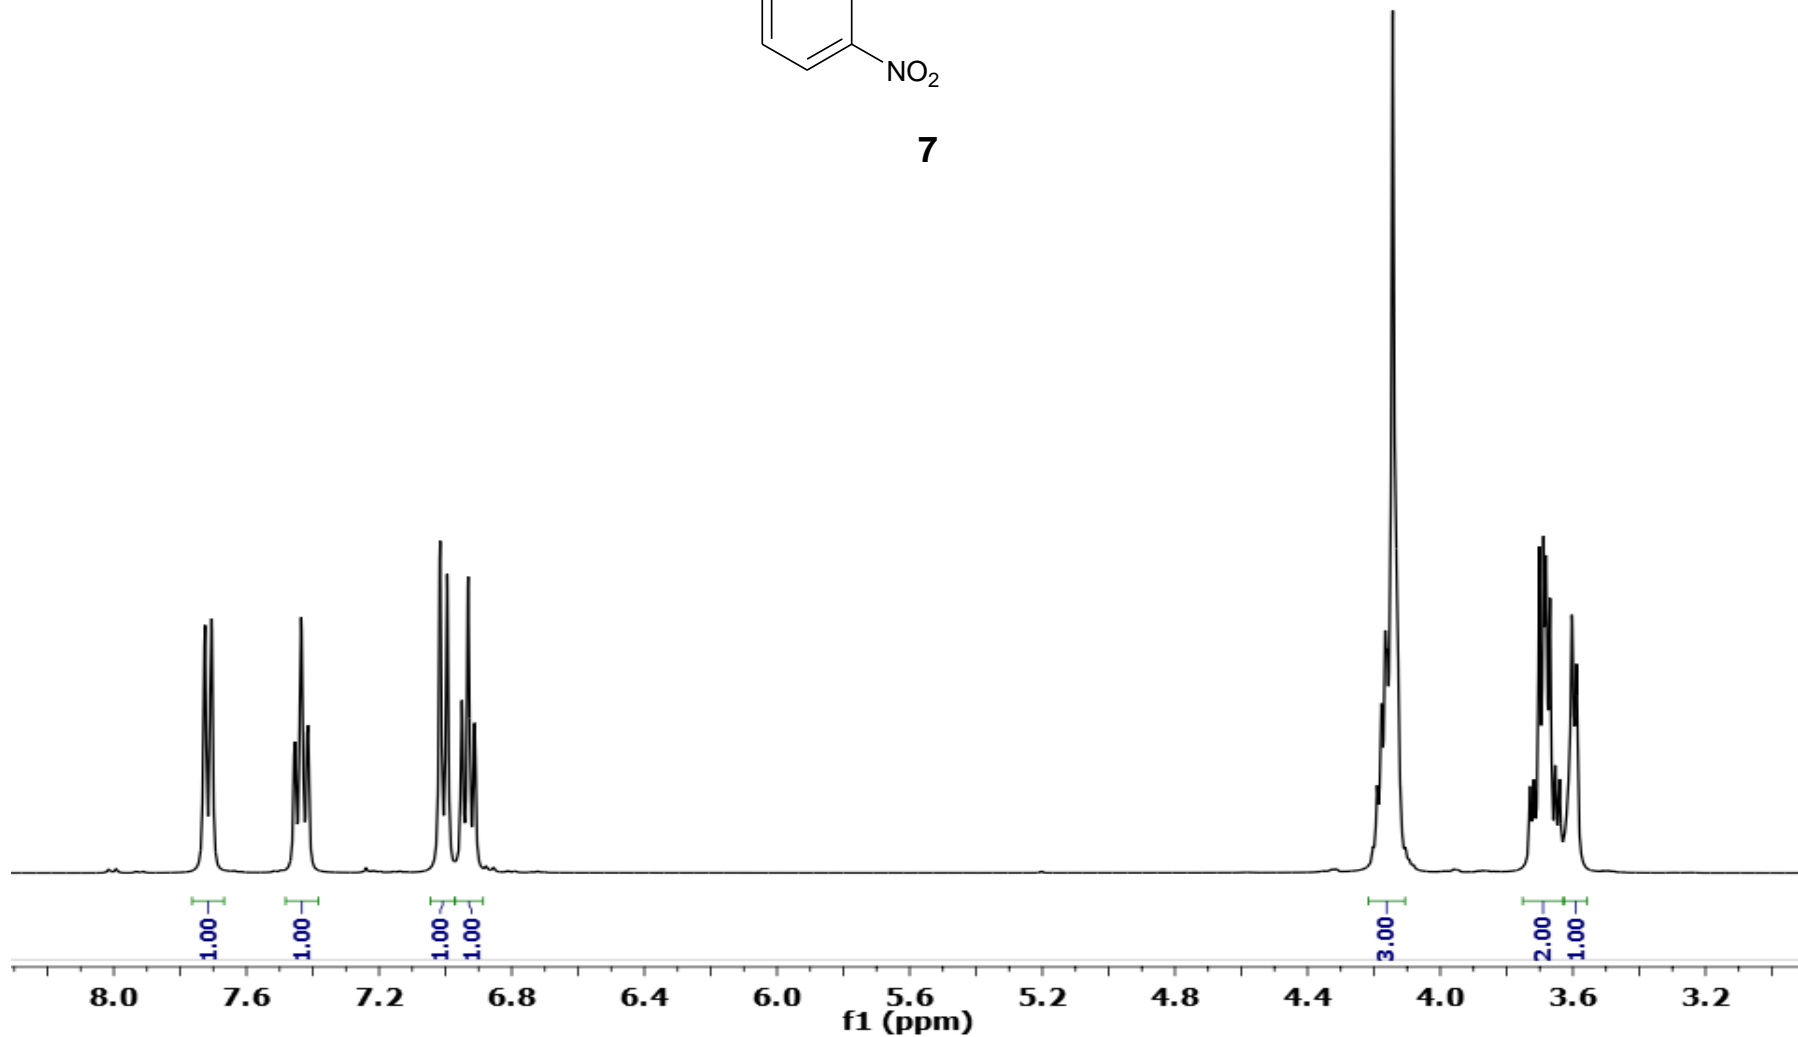

S 31

400 MHz, CDCl<sub>3</sub>

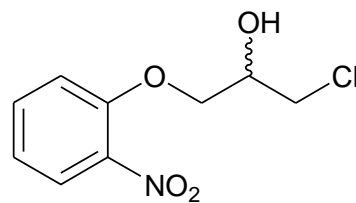

7

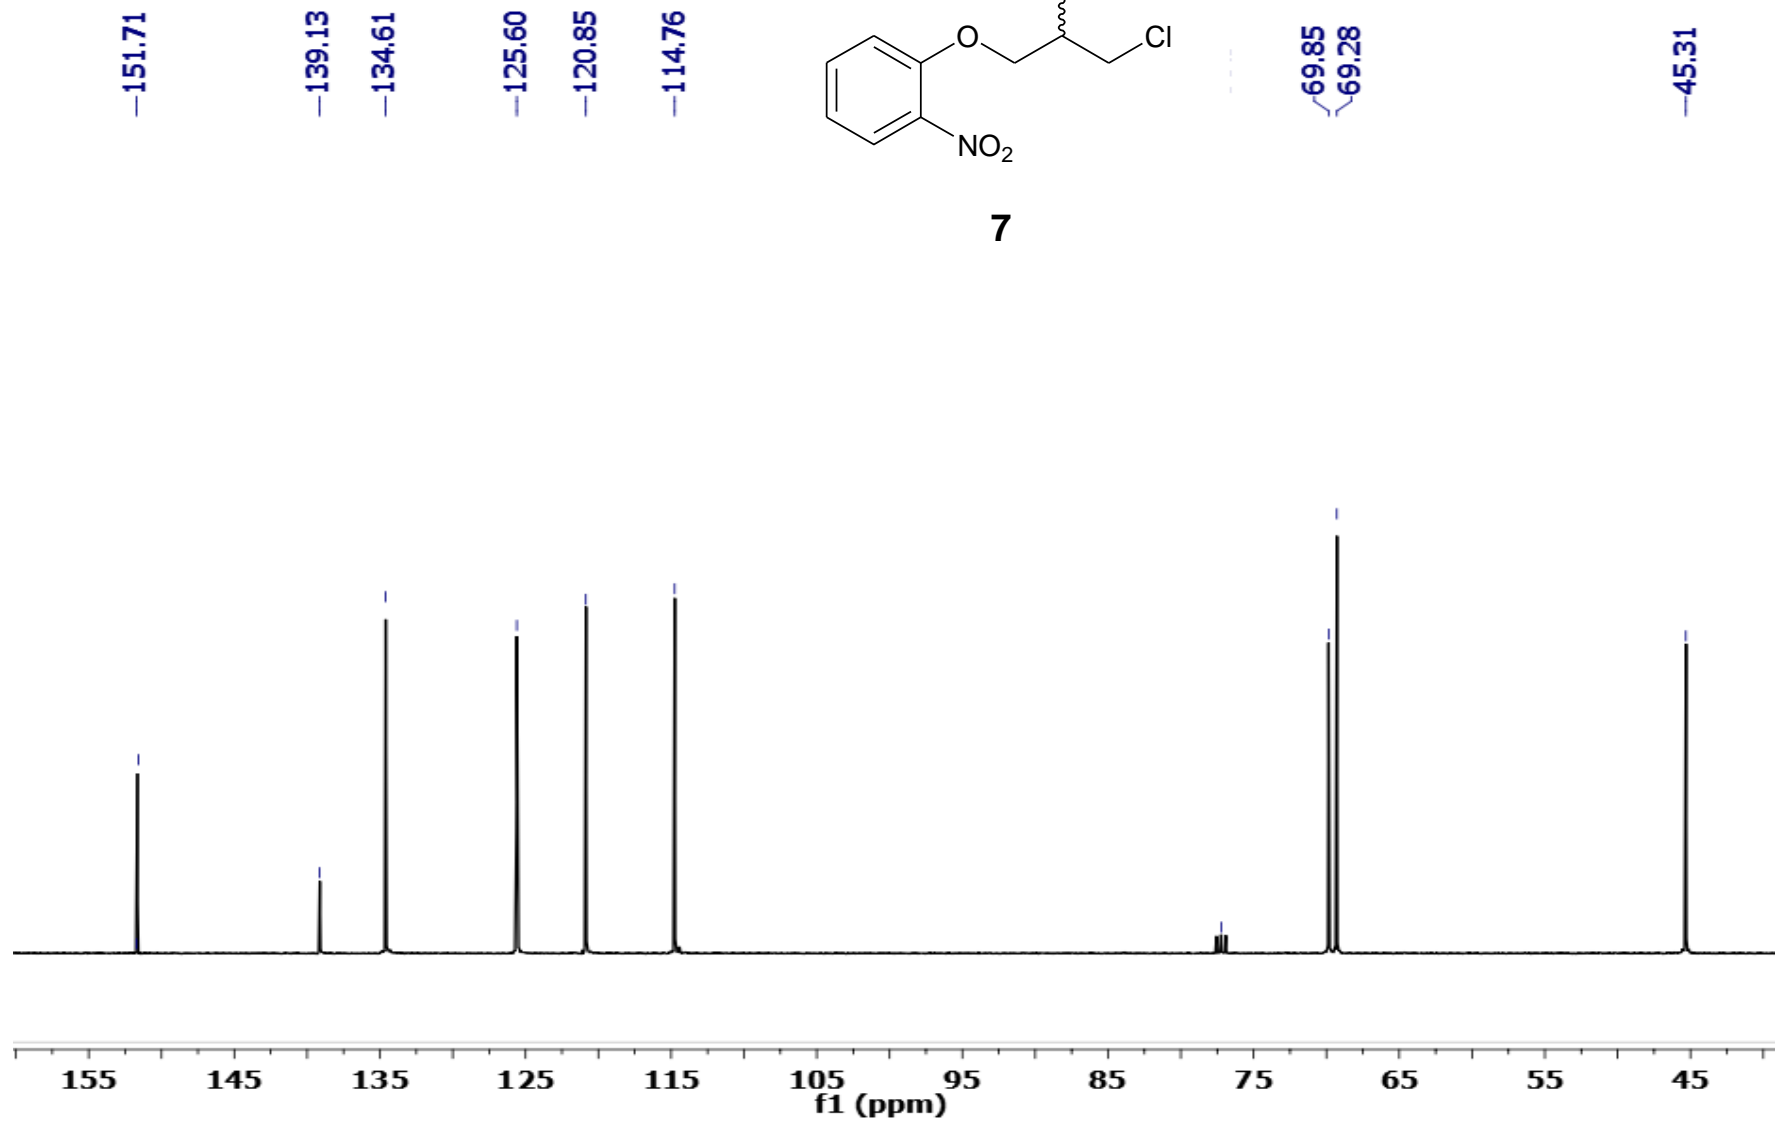

S 32

400 MHz, CDCl<sub>3</sub>

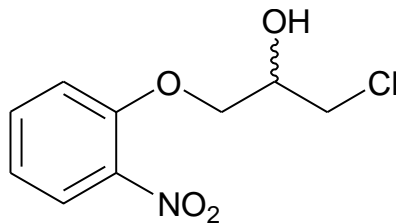

7

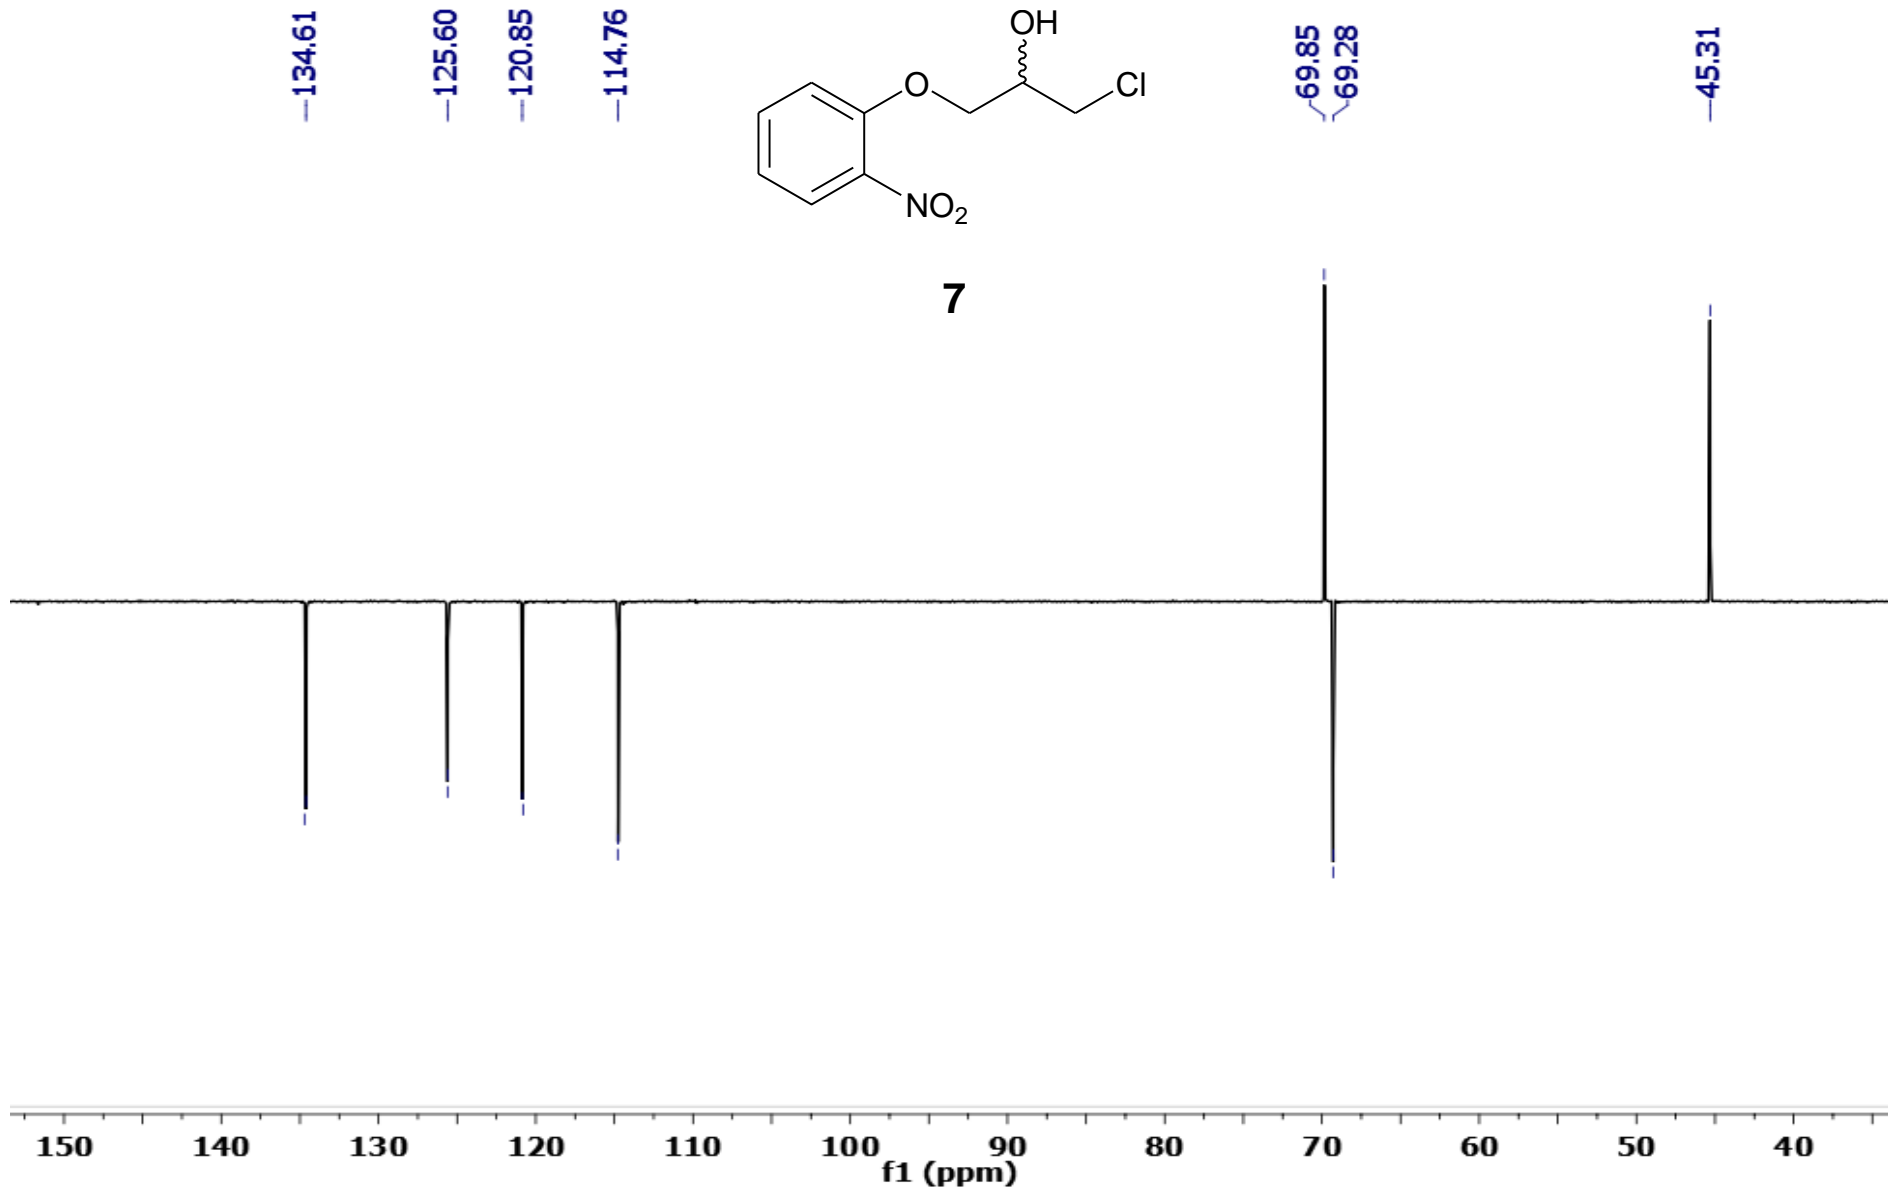



S 33

400 MHz, CDCl<sub>3</sub>

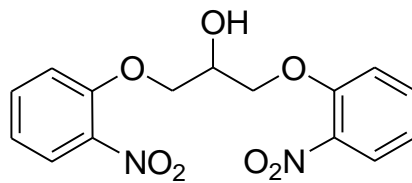

8

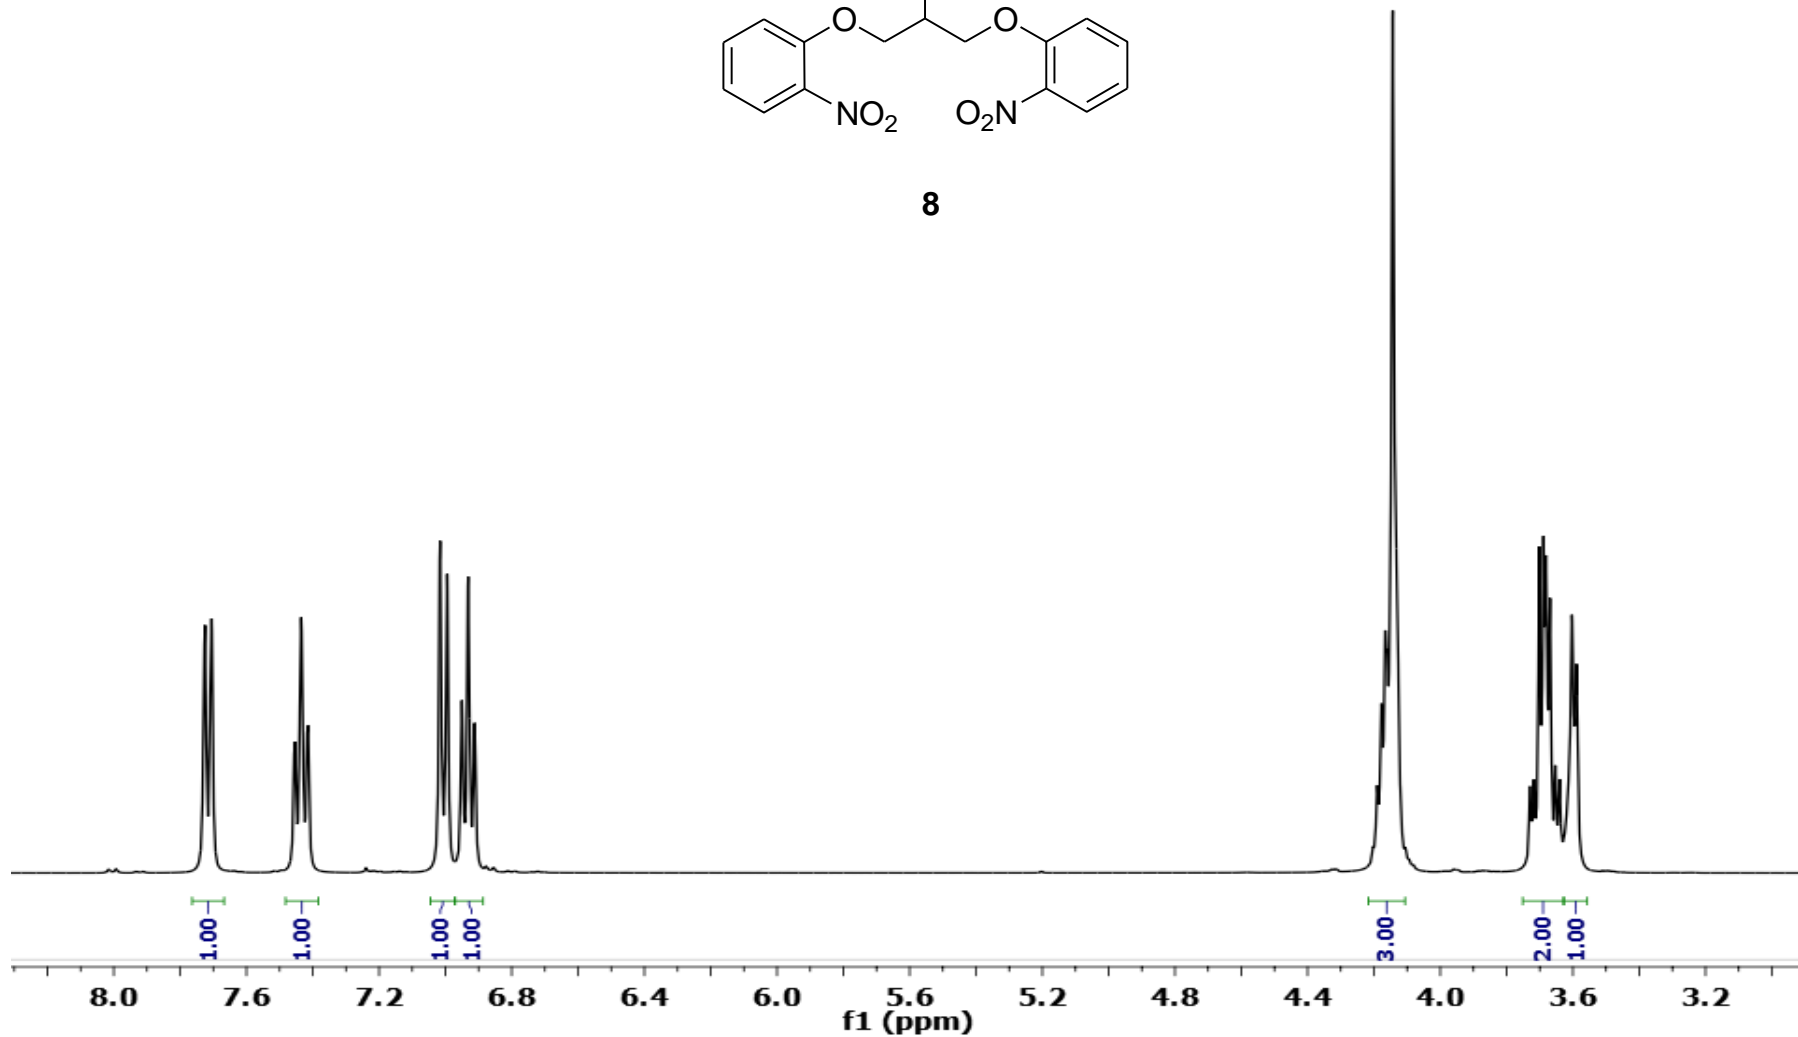

S 34

400 MHz, CDCl<sub>3</sub>

—152.34

—139.62

—134.85

—126.09

—121.07

—115.01

~71.26

~70.03

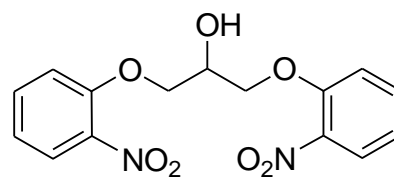

**8**

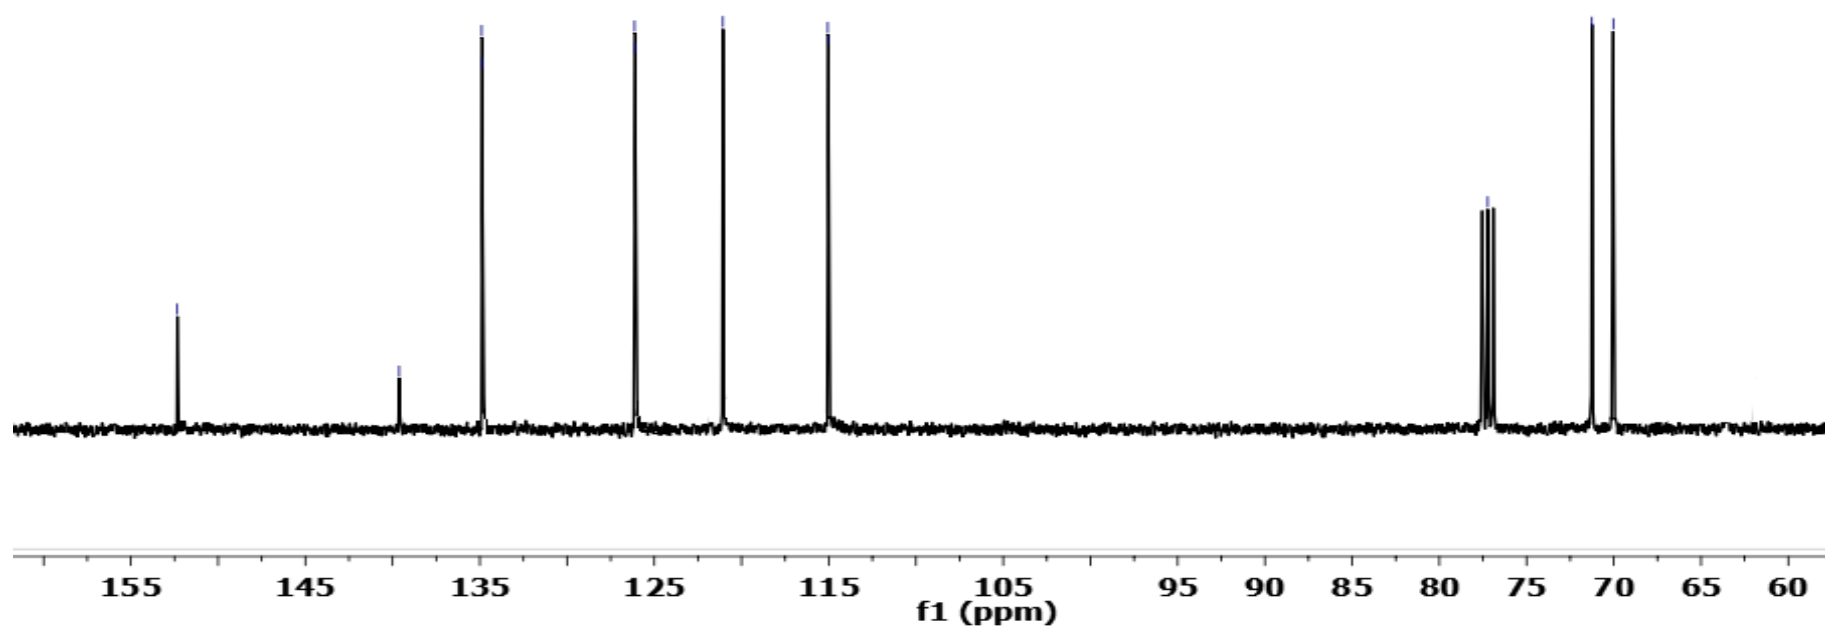

S 35

400 MHz, CDCl<sub>3</sub>

-134.85

-126.09

-121.07

-115.01

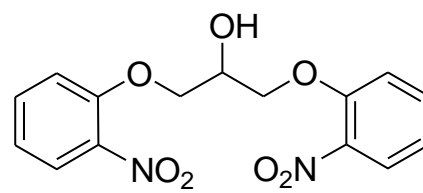

**8**

~71.26

~70.03

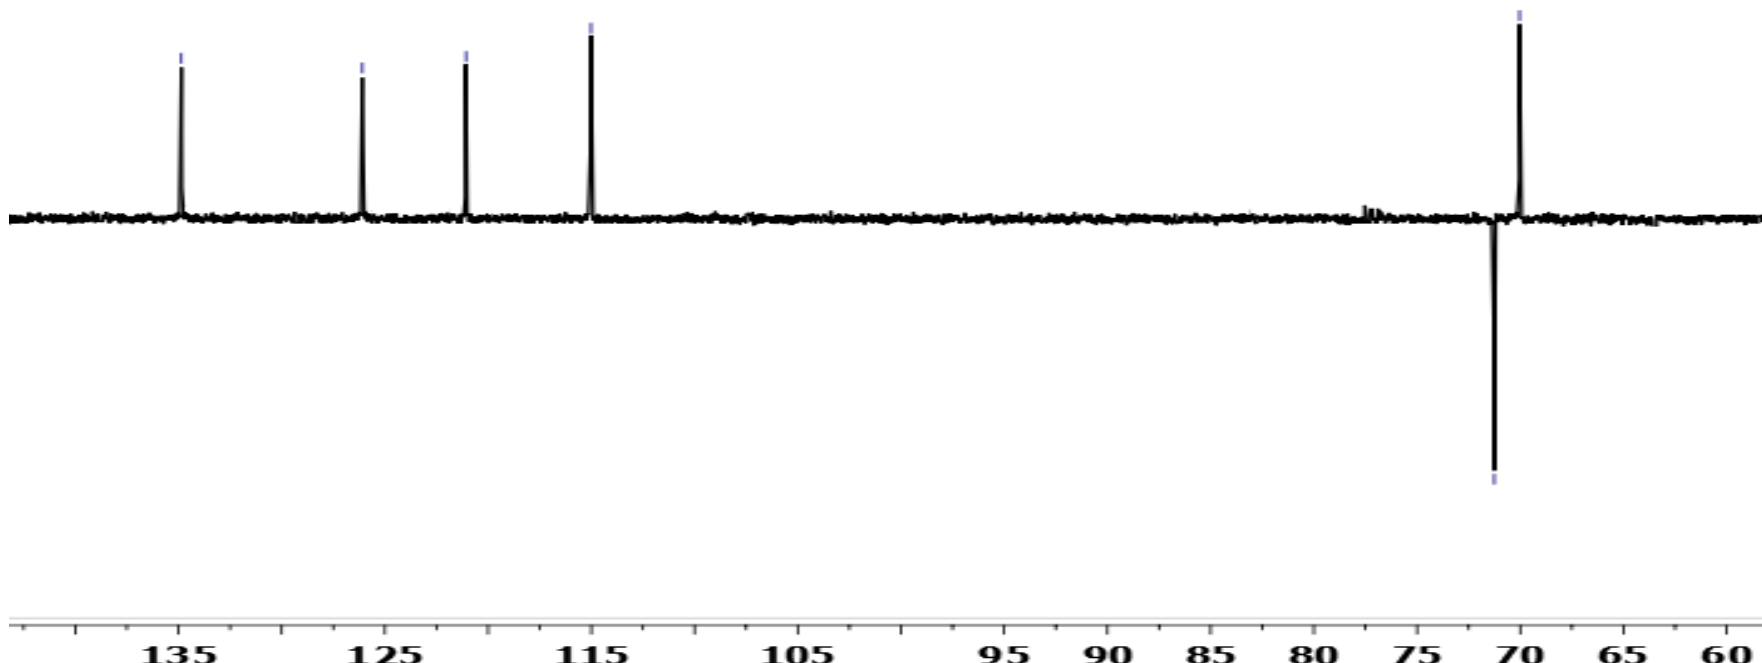

Supplement: c2ra21706f.pdf [file c2ra21706f.pdf]
